# Supplementary material for: Analysis of the effects of aryl hydrocarbon receptor expression on cancer cell invasionviathree-dimensional microfluidic invasion assays
Source: Royal Society of Chemistry journal article supplement (doi:10.1039/d1lc00854d), 2021-12-14
Supplement: d1lc00854d1.xlsx [file d1lc00854d1.xlsx]

## Sheet: Sheet1
	Gene Stable ID	Gene Name	logFoldChange	FDR
1	ENSG00000040608	RTN4R	-5.3345	0.00362
2	ENSG00000064300	NGFR	-5.21317	0.003991
3	ENSG00000064886	CHI3L2	4.96515	0.001186
4	ENSG00000069535	MAOB	-8.02696	0.003991
5	ENSG00000070404	FSTL3	-3.06147	0.035661
6	ENSG00000099960	SLC7A4	-7.56838	0.015989
7	ENSG00000102225	CDK16	-2.82965	0.04201
8	ENSG00000104818	CGB2	-4.21628	0.003991
9	ENSG00000104827	CGB3	-5.39713	0.001186
10	ENSG00000106541	AGR2	4.90032	0.016155
11	ENSG00000107954	NEURL1	-6.65624	0.04862
12	ENSG00000112210	RAB23	-2.65886	0.047244
13	ENSG00000112559	MDFI	-7.90584	0.003981
14	ENSG00000112561	TFEB	-3.16628	0.030035
15	ENSG00000114631	PODXL2	-3.61035	0.025442
16	ENSG00000115468	EFHD1	-3.99114	0.030035
17	ENSG00000115919	KYNU	3.75668	0.023076
18	ENSG00000118523	CCN2	-2.99168	0.027838
19	ENSG00000118777	ABCG2	-3.15078	0.029146
20	ENSG00000124107	SLPI	4.44459	0.002674
21	ENSG00000124731	TREM1	6.94442	0.038521
22	ENSG00000127324	TSPAN8	6.96348	0.000484
23	ENSG00000134061	CD180	-9.70869	0.000303
24	ENSG00000134339	SAA2	5.36686	0.00241
25	ENSG00000134363	FST	-3.34934	0.012923
26	ENSG00000135480	KRT7	-3.53757	0.027637
27	ENSG00000137273	FOXF2	-2.94633	0.030035
28	ENSG00000142765	SYTL1	-3.26156	0.04201
29	ENSG00000148346	LCN2	4.70225	0.021581
30	ENSG00000152518	ZFP36L2	-3.20023	0.015853
31	ENSG00000154274	C4orf19	-2.81159	0.04201
32	ENSG00000154930	ACSS1	-3.47989	0.033101
33	ENSG00000158246	TENT5B	-2.94277	0.039912
34	ENSG00000160862	AZGP1	7.43889	0.023076
35	ENSG00000161798	AQP5	-6.96956	0.000714
36	ENSG00000161904	LEMD2	-2.89793	0.035661
37	ENSG00000162366	PDZK1IP1	5.54714	0.00293
38	ENSG00000164125	GASK1B	-7.13895	0.030566
39	ENSG00000164400	CSF2	3.31976	0.023076
40	ENSG00000164692	COL1A2	-7.82771	0.009385
41	ENSG00000165272	AQP3	-4.04761	0.041833
42	ENSG00000166033	HTRA1	-3.64181	0.013588
43	ENSG00000167393	PPP2R3B	-2.85154	0.035517
44	ENSG00000167941	SOST	-4.68642	0.023076
45	ENSG00000170577	SIX2	-3.82994	0.038521
46	ENSG00000173432	SAA1	5.7664	0.001186
47	ENSG00000180233	ZNRF2	-3.22225	0.0169
48	ENSG00000183087	GAS6	-3.29043	0.035661
49	ENSG00000183876	ARSI	-5.30566	0.017995
50	ENSG00000188910	GJB3	-4.94522	0.035661
51	ENSG00000189052	CGB5	-4.70512	0.002674
52	ENSG00000196126	HLA-DRB1	3.89281	0.017995
53	ENSG00000196337	CGB7	-4.35289	0.00293
54	ENSG00000204397	CARD16	4.28887	0.035661
55	ENSG00000205809	KLRC2	4.13415	0.006793
56	ENSG00000213030	CGB8	-4.74534	0.002674
57	ENSG00000214049	UCA1	-3.87938	0.004897
58	ENSG00000228594	FNDC10	-3.0454	0.035661
59	ENSG00000237517	DGCR5	-4.7483	0.00362
60	ENSG00000253304	TMEM200B	-3.31418	0.030566
61	ENSG00000267631	CGB1	-4.46097	0.00293
62	ENSG00000269706	AC008687.6	-3.5265	0.04862
63	ENSG00000275896	PRSS2	9.13312	0.001186
64	ENSG00000277758	FO681492.1	-3.47382	0.038521
65	ENSG00000283646	LINC02009	-4.6123	0.01447
