# Supplementary material for: Analysis of the effects of aryl hydrocarbon receptor expression on cancer cell invasionviathree-dimensional microfluidic invasion assays
Source: Royal Society of Chemistry journal article supplement (doi:10.1039/d1lc00854d), 2021-12-14
Supplement: d1lc00854d2.xlsx [file d1lc00854d2.xlsx]

## Sheet: Sheet1
Groups	Go Term	GO ID	Ontology Source	# Genes	% Associated Genes	Term p-value	Associated Genes
1	TFAP2 (AP-2) family regulates transcription of growth factors and their receptors	R-HSA:8866910	REACTOME_Pathways_17.02.2020	3	20	1.11953e-05	[CGB3, CGB5, CGB8]
1	TFAP2A,TFAP2C homodimers stimulate CGB3 gene expression	R-HSA:8864431	REACTOME_Reactions_17.02.2020	3	60	2.51345e-07	[CGB3, CGB5, CGB8]
1	Transcriptional regulation by the AP-2 (TFAP2) family of transcription factors	R-HSA:8864260	REACTOME_Pathways_17.02.2020	3	7.89474	0.000197665	[CGB3, CGB5, CGB8]
1	CGA and CGB3 bind to form Human chorionic gonadotropin (hCG)	R-HSA:378978	REACTOME_Reactions_17.02.2020	3	75	1.00753e-07	[CGB3, CGB5, CGB8]
1	Peptide hormone biosynthesis	R-HSA:209952	REACTOME_Pathways_17.02.2020	3	21.4286	8.97531e-06	[CGB3, CGB5, CGB8]
1	Glycoprotein hormones	R-HSA:209822	REACTOME_Pathways_17.02.2020	3	25	5.44778e-06	[CGB3, CGB5, CGB8]
1	peptide hormone processing	GO:0016486	GO_BiologicalProcess-EBI-UniProt-GOA_17.02.2020_00h00	3	6.12245	0.000421737	[CGB3, CGB5, CGB8]
2	negative regulation of BMP signaling pathway	GO:0030514	GO_BiologicalProcess-EBI-UniProt-GOA_17.02.2020_00h00	4	6.34921	3.74058e-05	[FSTL3, HTRA1, LEMD2, SOST]
2	regulation of BMP signaling pathway	GO:0030510	GO_BiologicalProcess-EBI-UniProt-GOA_17.02.2020_00h00	6	5.35714	1.02605e-06	[FST, FSTL3, HTRA1, LEMD2, SLPI, SOST]
