# Supplementary material for: Analysis of the effects of aryl hydrocarbon receptor expression on cancer cell invasionviathree-dimensional microfluidic invasion assays
Source: Royal Society of Chemistry journal article supplement (doi:10.1039/d1lc00854d), 2021-12-14
Supplement: d1lc00854d3.xlsx [file d1lc00854d3.xlsx]

## Sheet: LRT_whole_DEGresults
	Gene Stable ID	Gene Name	logFoldChange	FDR
1	ENSG00000000971	CFH	3.0365	0.0175739
2	ENSG00000001617	SEMA3F	-3.57545	0.00904261
3	ENSG00000004897	CDC27	2.61757	0.0329202
4	ENSG00000005243	COPZ2	-3.01394	0.0173531
5	ENSG00000006118	TMEM132A	-2.88964	0.0210936
6	ENSG00000006453	BAIAP2L1	-2.40407	0.0446043
7	ENSG00000006459	KDM7A	-2.93344	0.0203014
8	ENSG00000006606	CCL26	7.57273	0.00106444
9	ENSG00000006638	TBXA2R	-2.36289	0.0491076
10	ENSG00000007520	TSR3	-2.35004	0.0480652
11	ENSG00000008130	NADK	-2.39135	0.0451414
12	ENSG00000010030	ETV7	3.21477	0.0495923
13	ENSG00000010810	FYN	-2.56272	0.0352103
14	ENSG00000011201	ANOS1	-2.63076	0.0337675
15	ENSG00000011260	UTP18	-2.32832	0.0495936
16	ENSG00000011295	TTC19	-2.52267	0.0371849
17	ENSG00000012048	BRCA1	2.5215	0.0383805
18	ENSG00000012171	SEMA3B	-3.4248	0.00984738
19	ENSG00000023318	ERP44	2.35816	0.0479168
20	ENSG00000023902	PLEKHO1	-2.55243	0.0361131
21	ENSG00000025708	TYMP	-2.90926	0.0204934
22	ENSG00000026751	SLAMF7	3.14102	0.0196507
23	ENSG00000029363	BCLAF1	2.46198	0.040729
24	ENSG00000031691	CENPQ	2.37358	0.0473818
25	ENSG00000033867	SLC4A7	-2.54283	0.0361131
26	ENSG00000035664	DAPK2	-2.72444	0.0283657
27	ENSG00000035862	TIMP2	2.45858	0.0416265
28	ENSG00000035928	RFC1	2.41591	0.0442844
29	ENSG00000037897	METTL1	2.60612	0.033886
30	ENSG00000038002	AGA	2.53178	0.0373956
31	ENSG00000038219	BOD1L1	-2.50746	0.0380328
32	ENSG00000038358	EDC4	-2.67225	0.029931
33	ENSG00000038427	VCAN	6.11165	0.00940294
34	ENSG00000040608	RTN4R	-2.98257	0.0219023
35	ENSG00000041802	LSG1	2.49988	0.0395365
36	ENSG00000047457	CP	4.84132	0.0366159
37	ENSG00000048740	CELF2	-2.61015	0.033288
38	ENSG00000049656	CLPTM1L	-2.90899	0.0204934
39	ENSG00000049769	PPP1R3F	-2.56638	0.0351974
40	ENSG00000050344	NFE2L3	-2.47741	0.0396772
41	ENSG00000050393	MCUR1	-2.57464	0.0345918
42	ENSG00000050730	TNIP3	2.61365	0.0384006
43	ENSG00000051128	HOMER3	-2.63068	0.0316504
44	ENSG00000051620	HEBP2	-2.77761	0.0255218
45	ENSG00000054118	THRAP3	2.7582	0.0263305
46	ENSG00000054148	PHPT1	2.33329	0.0493937
47	ENSG00000054277	OPN3	-3.53827	0.00904261
48	ENSG00000058453	CROCC	-2.60947	0.0334166
49	ENSG00000058866	DGKG	2.88583	0.0461903
50	ENSG00000059378	PARP12	-2.81593	0.024016
51	ENSG00000060138	YBX3	-2.89601	0.0207563
52	ENSG00000060140	STYK1	2.69255	0.0445225
53	ENSG00000060339	CCAR1	2.3952	0.0451414
54	ENSG00000060656	PTPRU	-2.91583	0.0219023
55	ENSG00000060971	ACAA1	-2.81263	0.024016
56	ENSG00000064726	BTBD1	-2.56088	0.0352103
57	ENSG00000064961	HMG20B	-3.03305	0.0168059
58	ENSG00000065328	MCM10	2.93519	0.0204341
59	ENSG00000065559	MAP2K4	-2.39191	0.0449878
60	ENSG00000068308	OTUD5	-2.49406	0.0388416
61	ENSG00000069011	PITX1	-3.51561	0.00904261
62	ENSG00000069399	BCL3	-3.96665	0.00425487
63	ENSG00000069509	FUNDC1	2.45019	0.0419987
64	ENSG00000070404	FSTL3	-3.47461	0.00923741
65	ENSG00000070423	RNF126	-2.58982	0.0337675
66	ENSG00000070831	CDC42	2.64793	0.0311702
67	ENSG00000071051	NCK2	-2.73317	0.0271537
68	ENSG00000071242	RPS6KA2	-3.34061	0.0113411
69	ENSG00000071859	FAM50A	-2.65632	0.0302346
70	ENSG00000072274	TFRC	2.47197	0.0402856
71	ENSG00000072518	MARK2	-2.83552	0.0234956
72	ENSG00000072858	SIDT1	-2.75176	0.033886
73	ENSG00000073169	SELENOO	-2.51259	0.0379726
74	ENSG00000073350	LLGL2	-2.48399	0.0396957
75	ENSG00000074181	NOTCH3	-3.23498	0.0225434
76	ENSG00000074527	NTN4	-2.99952	0.0184008
77	ENSG00000074964	ARHGEF10L	-2.52888	0.0373956
78	ENSG00000075131	TIPIN	2.6431	0.0314682
79	ENSG00000075290	WNT8B	-3.48379	0.0237971
80	ENSG00000075336	TIMM21	2.65555	0.0308598
81	ENSG00000076604	TRAF4	-2.9425	0.0197233
82	ENSG00000076826	CAMSAP3	-4.02319	0.00635157
83	ENSG00000077092	RARB	2.61987	0.0488723
84	ENSG00000077514	POLD3	2.55103	0.0361131
85	ENSG00000077585	GPR137B	-2.41796	0.0435603
86	ENSG00000078369	GNB1	-2.8096	0.0240856
87	ENSG00000078699	CBFA2T2	-3.02667	0.0170775
88	ENSG00000078808	SDF4	-3.03956	0.0166933
89	ENSG00000079263	SP140	3.23267	0.0170853
90	ENSG00000079308	TNS1	4.61749	0.00493249
91	ENSG00000079393	DUSP13	5.43615	0.0190761
92	ENSG00000081041	CXCL2	-2.34348	0.048372
93	ENSG00000081051	AFP	2.74719	0.040729
94	ENSG00000082014	SMARCD3	-3.05228	0.0164791
95	ENSG00000082126	MPP4	3.01189	0.0192682
96	ENSG00000082497	SERTAD4	-2.57214	0.0346579
97	ENSG00000082781	ITGB5	-3.14007	0.0145254
98	ENSG00000083290	ULK2	-2.43467	0.0433285
99	ENSG00000083457	ITGAE	2.49823	0.0386311
100	ENSG00000084710	EFR3B	5.4847	0.0182043
101	ENSG00000085741	WNT11	-4.38054	0.0027149
102	ENSG00000085760	MTIF2	2.42169	0.0435603
103	ENSG00000086544	ITPKC	-2.48939	0.0395365
104	ENSG00000088256	GNA11	-2.77309	0.0256093
105	ENSG00000088726	TMEM40	2.7606	0.0309061
106	ENSG00000088766	CRLS1	-3.05215	0.016298
107	ENSG00000088986	DYNLL1	2.50402	0.038251
108	ENSG00000089127	OAS1	4.03896	0.0175739
109	ENSG00000089163	SIRT4	2.51984	0.0491076
110	ENSG00000089234	BRAP	-2.71003	0.0280881
111	ENSG00000089351	GRAMD1A	-2.56211	0.0353404
112	ENSG00000089847	ANKRD24	-2.78026	0.0314462
113	ENSG00000089876	DHX32	-2.51735	0.0375399
114	ENSG00000090006	LTBP4	-2.95909	0.018903
115	ENSG00000090061	CCNK	3.21192	0.0201103
116	ENSG00000090238	YPEL3	-2.65197	0.0306677
117	ENSG00000090266	NDUFB2	2.33345	0.0493937
118	ENSG00000090372	STRN4	-2.42609	0.0428644
119	ENSG00000090889	KIF4A	2.7772	0.0260117
120	ENSG00000090975	PITPNM2	-2.4537	0.0433931
121	ENSG00000091128	LAMB4	3.60559	0.0465743
122	ENSG00000091732	ZC3HC1	2.43168	0.0433487
123	ENSG00000092098	RNF31	-2.81826	0.024016
124	ENSG00000092200	RPGRIP1	6.32721	0.00763767
125	ENSG00000092621	PHGDH	2.6575	0.0433931
126	ENSG00000092853	CLSPN	3.60979	0.00838524
127	ENSG00000095203	EPB41L4B	-2.59553	0.0336631
128	ENSG00000095739	BAMBI	-2.83694	0.0230938
129	ENSG00000096063	SRPK1	2.42549	0.0431278
130	ENSG00000096092	TMEM14A	2.354	0.0479285
131	ENSG00000096401	CDC5L	2.48253	0.0396957
132	ENSG00000097096	SYDE2	-2.88398	0.022139
133	ENSG00000099331	MYO9B	-2.35221	0.0480828
134	ENSG00000099385	BCL7C	-2.65542	0.0303389
135	ENSG00000099625	CBARP	-3.06423	0.0186124
136	ENSG00000099785	MARCHF2	-2.64835	0.0309061
137	ENSG00000099804	CDC34	-2.94659	0.0192682
138	ENSG00000099866	MADCAM1	-2.65032	0.0463952
139	ENSG00000099953	MMP11	-2.42544	0.0435268
140	ENSG00000100027	YPEL1	-2.53572	0.0379732
141	ENSG00000100028	SNRPD3	2.35454	0.047927
142	ENSG00000100038	TOP3B	5.03276	0.029931
143	ENSG00000100058	CRYBB2P1	2.43113	0.0437181
144	ENSG00000100075	SLC25A1	-2.61087	0.0329202
145	ENSG00000100106	TRIOBP	-2.462	0.04042
146	ENSG00000100162	CENPM	2.34876	0.0482304
147	ENSG00000100234	TIMP3	-2.84638	0.0226373
148	ENSG00000100242	SUN2	-3.57178	0.00865076
149	ENSG00000100276	RASL10A	-2.66809	0.0351484
150	ENSG00000100387	RBX1	2.40142	0.0445225
151	ENSG00000100399	CHADL	-2.66675	0.0345947
152	ENSG00000100479	POLE2	2.57856	0.0346579
153	ENSG00000100592	DAAM1	2.94734	0.0207954
154	ENSG00000100911	PSME2	2.45045	0.0411229
155	ENSG00000100997	ABHD12	-2.91435	0.0203014
156	ENSG00000101057	MYBL2	-2.7265	0.0272501
157	ENSG00000101210	EEF1A2	-2.76001	0.0273464
158	ENSG00000101222	SPEF1	-3.54552	0.0109873
159	ENSG00000101400	SNTA1	-2.60491	0.0332584
160	ENSG00000101412	E2F1	-2.60258	0.0333163
161	ENSG00000101439	CST3	-2.53633	0.0364654
162	ENSG00000101441	CST4	2.43469	0.0425798
163	ENSG00000101460	MAP1LC3A	-2.62752	0.0322772
164	ENSG00000101489	CELF4	-2.85153	0.0380328
165	ENSG00000101868	POLA1	2.7364	0.0314462
166	ENSG00000102103	PQBP1	2.33575	0.0494687
167	ENSG00000102109	PCSK1N	-3.27161	0.0127078
168	ENSG00000102225	CDK16	-3.14806	0.0143166
169	ENSG00000102362	SYTL4	2.94265	0.0263144
170	ENSG00000102384	CENPI	2.9082	0.0219462
171	ENSG00000102547	CAB39L	2.55818	0.0384064
172	ENSG00000102760	RGCC	-3.84751	0.00530861
173	ENSG00000102871	TRADD	-2.345	0.0483401
174	ENSG00000102879	CORO1A	2.79627	0.0302346
175	ENSG00000103035	PSMD7	2.55161	0.0358466
176	ENSG00000103089	FA2H	-3.01685	0.0240856
177	ENSG00000103150	MLYCD	-2.36973	0.0470245
178	ENSG00000103249	CLCN7	-2.44447	0.0419075
179	ENSG00000103260	METRN	-2.69812	0.0283657
180	ENSG00000103266	STUB1	-2.49797	0.0386311
181	ENSG00000103316	CRYM	3.58661	0.0311431
182	ENSG00000104140	RHOV	-3.50679	0.00924488
183	ENSG00000104341	LAPTM4B	-2.67672	0.0292755
184	ENSG00000104356	POP1	2.95627	0.020444
185	ENSG00000104856	RELB	-2.58408	0.0341769
186	ENSG00000104892	KLC3	-2.7331	0.0283327
187	ENSG00000104899	AMH	-2.98024	0.0186525
188	ENSG00000104903	LYL1	-3.3047	0.0123084
189	ENSG00000104960	PTOV1	-2.88373	0.0212012
190	ENSG00000104964	TLE5	-2.62588	0.0319957
191	ENSG00000104983	CCDC61	-3.23238	0.0128667
192	ENSG00000105063	PPP6R1	-2.5474	0.0361131
193	ENSG00000105173	CCNE1	-2.68203	0.0291645
194	ENSG00000105204	DYRK1B	-2.41841	0.0449264
195	ENSG00000105289	TJP3	-2.96171	0.0207563
196	ENSG00000105329	TGFB1	-2.86681	0.0219547
197	ENSG00000105373	NOP53	-2.64068	0.031292
198	ENSG00000105376	ICAM5	-2.90205	0.0216634
199	ENSG00000105419	MEIS3	-2.99966	0.0203014
200	ENSG00000105467	SYNGR4	6.14525	0.00904261
201	ENSG00000105472	CLEC11A	-4.27721	0.00337082
202	ENSG00000105516	DBP	-2.78759	0.0255218
203	ENSG00000105643	ARRDC2	-2.72037	0.027644
204	ENSG00000105699	LSR	-2.49667	0.0386311
205	ENSG00000105711	SCN1B	-3.17749	0.0143166
206	ENSG00000105717	PBX4	-2.88596	0.021616
207	ENSG00000105726	ATP13A1	-2.45607	0.0407794
208	ENSG00000105894	PTN	2.89897	0.0265934
209	ENSG00000105929	ATP6V0A4	3.69807	0.0271537
210	ENSG00000105983	LMBR1	-2.62066	0.0322796
211	ENSG00000106003	LFNG	-3.63147	0.00828504
212	ENSG00000106013	ANKRD7	2.45376	0.0486713
213	ENSG00000106070	GRB10	-2.54428	0.0361131
214	ENSG00000106263	EIF3B	-2.64676	0.0309061
215	ENSG00000106541	AGR2	4.83499	0.00113104
216	ENSG00000106588	PSMA2	2.36201	0.0482631
217	ENSG00000106609	TMEM248	-2.78888	0.0248688
218	ENSG00000106714	CNTNAP3	-2.39207	0.0455594
219	ENSG00000106803	SEC61B	2.46608	0.0402856
220	ENSG00000106823	ECM2	3.11656	0.0446906
221	ENSG00000107130	NCS1	-2.67527	0.0294879
222	ENSG00000107140	TESK1	-2.38166	0.0473818
223	ENSG00000107281	NPDC1	-2.36693	0.0471548
224	ENSG00000107338	SHB	-2.57179	0.0348495
225	ENSG00000107372	ZFAND5	-2.72677	0.0272501
226	ENSG00000107816	LZTS2	-2.64936	0.0309061
227	ENSG00000107859	PITX3	-2.84849	0.0373956
228	ENSG00000108055	SMC3	2.66015	0.0302323
229	ENSG00000108219	TSPAN14	-2.33221	0.0493937
230	ENSG00000108262	GIT1	-2.47965	0.0396474
231	ENSG00000108306	FBXL20	-2.37975	0.0465913
232	ENSG00000108551	RASD1	-3.42761	0.00998109
233	ENSG00000108590	MED31	2.44019	0.0423037
234	ENSG00000108604	SMARCD2	-2.39798	0.0446906
235	ENSG00000108784	NAGLU	-3.18448	0.0134909
236	ENSG00000108826	MRPL27	2.73107	0.0271537
237	ENSG00000108984	MAP2K6	6.2119	0.00904261
238	ENSG00000109163	GNRHR	4.70346	0.0416454
239	ENSG00000109265	CRACD	-2.52713	0.03987
240	ENSG00000109466	KLHL2	-2.69793	0.0284055
241	ENSG00000109472	CPE	-3.91759	0.00479589
242	ENSG00000109511	ANXA10	4.56051	0.00904261
243	ENSG00000109610	SOD3	-2.64521	0.0313559
244	ENSG00000109787	KLF3	-2.69922	0.0283657
245	ENSG00000109805	NCAPG	2.40618	0.0446906
246	ENSG00000109943	CRTAM	3.13445	0.0271537
247	ENSG00000110057	UNC93B1	-2.48733	0.0391339
248	ENSG00000110195	FOLR1	2.82899	0.0379732
249	ENSG00000110318	CEP126	2.49209	0.0456581
250	ENSG00000110700	RPS13	2.37118	0.0465743
251	ENSG00000110721	CHKA	-2.89971	0.0207563
252	ENSG00000110852	CLEC2B	3.41581	0.0125364
253	ENSG00000110987	BCL7A	-2.41122	0.0442844
254	ENSG00000111196	MAGOHB	2.39165	0.0451414
255	ENSG00000111247	RAD51AP1	2.43458	0.0425798
256	ENSG00000111328	CDK2AP1	-2.74247	0.0268438
257	ENSG00000111341	MGP	3.88824	0.00904261
258	ENSG00000111412	C12orf49	-2.43706	0.0421654
259	ENSG00000111665	CDCA3	2.86086	0.0222916
260	ENSG00000111666	CHPT1	-2.60837	0.0329234
261	ENSG00000111678	C12orf57	2.73026	0.0274774
262	ENSG00000111679	PTPN6	2.66644	0.0411166
263	ENSG00000111786	SRSF9	-2.67703	0.0292755
264	ENSG00000111845	PAK1IP1	2.32768	0.0498809
265	ENSG00000111885	MAN1A1	-2.34892	0.0491076
266	ENSG00000112299	VNN1	4.07906	0.0113531
267	ENSG00000112303	VNN2	4.83188	0.00635157
268	ENSG00000112312	GMNN	2.91802	0.0203014
269	ENSG00000112539	C6orf118	5.99468	0.0110497
270	ENSG00000112561	TFEB	-2.75718	0.0268438
271	ENSG00000112576	CCND3	-2.40053	0.0445225
272	ENSG00000112699	GMDS	-2.44028	0.041953
273	ENSG00000112773	TENT5A	-2.58353	0.0341769
274	ENSG00000113083	LOX	-3.67686	0.00704314
275	ENSG00000113194	FAF2	2.33344	0.049858
276	ENSG00000113384	GOLPH3	-2.80702	0.0242463
277	ENSG00000113578	FGF1	2.45618	0.0433931
278	ENSG00000113657	DPYSL3	4.55307	0.0481911
279	ENSG00000113966	ARL6	3.11921	0.0170775
280	ENSG00000114315	HES1	-2.38014	0.0461903
281	ENSG00000114353	GNAI2	-2.80376	0.0243024
282	ENSG00000114529	C3orf52	3.29607	0.0147994
283	ENSG00000114541	FRMD4B	2.63039	0.047927
284	ENSG00000114631	PODXL2	-3.48025	0.00922682
285	ENSG00000114646	CSPG5	-3.66144	0.00867397
286	ENSG00000114812	VIPR1	-3.49102	0.0147371
287	ENSG00000115009	CCL20	4.8868	0.00113104
288	ENSG00000115041	KCNIP3	-2.78655	0.0256318
289	ENSG00000115112	TFCP2L1	2.61265	0.0445225
290	ENSG00000115226	FNDC4	-3.71852	0.00670857
291	ENSG00000115275	MOGS	-2.82134	0.0237971
292	ENSG00000115457	IGFBP2	-3.6458	0.00904261
293	ENSG00000115539	PDCL3	2.41532	0.0438843
294	ENSG00000115738	ID2	3.23548	0.0147371
295	ENSG00000115756	HPCAL1	-2.36715	0.0469516
296	ENSG00000115758	ODC1	-2.76064	0.0261102
297	ENSG00000115884	SDC1	-2.39955	0.0446906
298	ENSG00000116039	ATP6V1B1	-3.31855	0.0141481
299	ENSG00000116106	EPHA4	3.43039	0.0168059
300	ENSG00000116299	KIAA1324	6.0626	0.000744787
301	ENSG00000116514	RNF19B	-2.82709	0.0237971
302	ENSG00000116604	MEF2D	-2.41188	0.0442844
303	ENSG00000116649	SRM	-2.86193	0.0219547
304	ENSG00000116661	FBXO2	-2.99443	0.0182726
305	ENSG00000116685	KIAA2013	-3.15037	0.0143166
306	ENSG00000116701	NCF2	2.64631	0.0380187
307	ENSG00000116741	RGS2	2.46415	0.0422539
308	ENSG00000116752	BCAS2	2.35052	0.0480996
309	ENSG00000116785	CFHR3	4.65227	0.0435603
310	ENSG00000116819	TFAP2E	-2.65717	0.0329234
311	ENSG00000116990	MYCL	-3.57863	0.0147994
312	ENSG00000117000	RLF	2.34707	0.0498809
313	ENSG00000117069	ST6GALNAC5	3.3245	0.0158226
314	ENSG00000117385	P3H1	-2.40617	0.0442733
315	ENSG00000117411	B4GALT2	-2.344	0.0486713
316	ENSG00000117691	NENF	-2.79286	0.024798
317	ENSG00000117697	NSL1	2.44654	0.0419195
318	ENSG00000117724	CENPF	2.80129	0.0245044
319	ENSG00000117791	43892	-2.35315	0.0481911
320	ENSG00000117868	ESYT2	-2.44112	0.0419384
321	ENSG00000117906	RCN2	-2.65792	0.0302323
322	ENSG00000118046	STK11	-3.07987	0.0156183
323	ENSG00000118412	CASP8AP2	2.9494	0.0201076
324	ENSG00000118507	AKAP7	-2.46843	0.040729
325	ENSG00000118523	CCN2	-2.89942	0.0207563
326	ENSG00000118579	MED28	2.40594	0.0446906
327	ENSG00000118898	PPL	-2.67689	0.0329202
328	ENSG00000119013	NDUFB3	2.39711	0.0446906
329	ENSG00000119227	PIGZ	-2.43931	0.0441249
330	ENSG00000119242	CCDC92	-2.35915	0.0475719
331	ENSG00000119408	NEK6	-2.43097	0.0424632
332	ENSG00000119514	GALNT12	-3.55419	0.00904261
333	ENSG00000119523	ALG2	-2.53293	0.0367611
334	ENSG00000119630	PGF	-2.76819	0.0258576
335	ENSG00000119698	PPP4R4	-2.563	0.038155
336	ENSG00000119707	RBM25	2.52462	0.037324
337	ENSG00000119725	ZNF410	2.78846	0.0442844
338	ENSG00000119820	YIPF4	-2.69935	0.0283657
339	ENSG00000119900	OGFRL1	-2.69852	0.0283657
340	ENSG00000119950	MXI1	-3.0021	0.0176407
341	ENSG00000120051	CFAP58	2.81199	0.0442844
342	ENSG00000120129	DUSP1	-3.58208	0.00859435
343	ENSG00000120333	MRPS14	2.34388	0.0485761
344	ENSG00000120533	ENY2	2.36108	0.0473818
345	ENSG00000121152	NCAPH	2.36152	0.047927
346	ENSG00000121316	PLBD1	-2.74793	0.0265934
347	ENSG00000121390	PSPC1	-2.66933	0.029755
348	ENSG00000121577	POPDC2	4.24291	0.0212713
349	ENSG00000121797	CCRL2	3.01883	0.0186525
350	ENSG00000121858	TNFSF10	2.59261	0.0410164
351	ENSG00000122490	SLC66A2	-2.42003	0.0435268
352	ENSG00000122952	ZWINT	2.36053	0.0473818
353	ENSG00000123143	PKN1	-3.12307	0.0147371
354	ENSG00000123159	GIPC1	-2.4805	0.0395386
355	ENSG00000123179	EBPL	-2.80467	0.0243024
356	ENSG00000123201	GUCY1B2	3.52583	0.033886
357	ENSG00000123219	CENPK	2.40972	0.0442844
358	ENSG00000123297	TSFM	2.50144	0.0388721
359	ENSG00000123353	ORMDL2	2.55547	0.0361131
360	ENSG00000123411	IKZF4	2.92723	0.0403809
361	ENSG00000123843	C4BPB	3.14921	0.0174199
362	ENSG00000123892	RAB38	3.04259	0.0180217
363	ENSG00000123933	MXD4	-2.708	0.0281237
364	ENSG00000124107	SLPI	2.73038	0.0284055
365	ENSG00000124191	TOX2	-2.53395	0.0367919
366	ENSG00000124466	LYPD3	2.5875	0.0473818
367	ENSG00000124535	WRNIP1	-2.60479	0.033203
368	ENSG00000124541	RRP36	-2.78587	0.0250987
369	ENSG00000124562	SNRPC	2.48837	0.039096
370	ENSG00000124587	PEX6	-2.35095	0.0481911
371	ENSG00000124596	OARD1	2.46996	0.0402856
372	ENSG00000124635	H2BC11	2.93853	0.0433931
373	ENSG00000124659	TBCC	-2.69856	0.0283657
374	ENSG00000124772	CPNE5	3.12712	0.0225434
375	ENSG00000125170	DOK4	-3.23079	0.0130457
376	ENSG00000125657	TNFSF9	-2.46763	0.0402348
377	ENSG00000125798	FOXA2	-2.4994	0.0386311
378	ENSG00000125804	FAM182A	-3.84244	0.0158947
379	ENSG00000125968	ID1	-2.94714	0.0192682
380	ENSG00000125970	RALY	-2.538	0.0363606
381	ENSG00000126460	PRRG2	5.83336	0.0127078
382	ENSG00000126749	EMG1	2.60236	0.0340669
383	ENSG00000126785	RHOJ	4.39959	0.0113411
384	ENSG00000126821	SGPP1	-2.80574	0.024326
385	ENSG00000126895	AVPR2	2.94549	0.0470245
386	ENSG00000126903	SLC10A3	-2.60452	0.0332584
387	ENSG00000126934	MAP2K2	-2.63714	0.0314462
388	ENSG00000127324	TSPAN8	5.73927	9.33891e-05
389	ENSG00000127415	IDUA	-3.43974	0.00977188
390	ENSG00000127507	ADGRE2	-2.52508	0.0380328
391	ENSG00000127528	KLF2	-3.02603	0.0172826
392	ENSG00000127561	SYNGR3	-3.8904	0.00562842
393	ENSG00000127578	WFIKKN1	-3.90336	0.0158871
394	ENSG00000128011	LRFN1	-2.85251	0.0383805
395	ENSG00000128383	APOBEC3A	2.9697	0.024798
396	ENSG00000128408	RIBC2	2.86957	0.0242532
397	ENSG00000128422	KRT17	-4.5788	0.00113104
398	ENSG00000128482	RNF112	5.84072	0.0126488
399	ENSG00000128564	VGF	-2.86045	0.0256093
400	ENSG00000128617	OPN1SW	5.72407	0.0139834
401	ENSG00000128645	HOXD1	-2.7077	0.0314462
402	ENSG00000128656	CHN1	-2.52813	0.0371849
403	ENSG00000129038	LOXL1	-2.97086	0.0186525
404	ENSG00000129235	TXNDC17	2.42025	0.0433285
405	ENSG00000129255	MPDU1	2.35529	0.0479793
406	ENSG00000129317	PUS7L	2.44054	0.0425798
407	ENSG00000129473	BCL2L2	2.45492	0.0498809
408	ENSG00000129535	NRL	-3.72858	0.0072065
409	ENSG00000129562	DAD1	2.35723	0.047612
410	ENSG00000129757	CDKN1C	-2.43495	0.0425798
411	ENSG00000129810	SGO1	2.50213	0.0386311
412	ENSG00000129925	PGAP6	-2.44411	0.041877
413	ENSG00000130024	PHF10	-3.01961	0.0171047
414	ENSG00000130150	MOSPD2	2.65197	0.0336277
415	ENSG00000130203	APOE	-4.40771	0.00130335
416	ENSG00000130208	APOC1	2.74692	0.0404508
417	ENSG00000130303	BST2	2.96581	0.0205585
418	ENSG00000130347	RTN4IP1	2.41578	0.0451497
419	ENSG00000130511	SSBP4	-3.26646	0.0125602
420	ENSG00000130513	GDF15	-3.16202	0.0141481
421	ENSG00000130522	JUND	-3.43623	0.00977188
422	ENSG00000130643	CALY	-2.67262	0.0444645
423	ENSG00000130734	ATG4D	-2.73526	0.0271537
424	ENSG00000130748	TMEM160	-2.55965	0.0352242
425	ENSG00000130812	ANGPTL6	-2.50517	0.0446906
426	ENSG00000130881	LRP3	-3.04514	0.0169399
427	ENSG00000130956	HABP4	-3.25122	0.0127078
428	ENSG00000130958	SLC35D2	-3.35322	0.0113411
429	ENSG00000131037	EPS8L1	-2.37375	0.04719
430	ENSG00000131094	C1QL1	-2.88112	0.0228265
431	ENSG00000131096	PYY	-3.11415	0.0158226
432	ENSG00000131188	PRR7	-2.62348	0.0321466
433	ENSG00000131435	PDLIM4	-2.32712	0.0496909
434	ENSG00000131470	PSMC3IP	2.99597	0.0186525
435	ENSG00000131584	ACAP3	-3.21193	0.0131887
436	ENSG00000131650	KREMEN2	-2.77604	0.0269187
437	ENSG00000131747	TOP2A	2.60986	0.0330348
438	ENSG00000131773	KHDRBS3	-2.73369	0.0271537
439	ENSG00000131781	FMO5	2.88721	0.040073
440	ENSG00000132326	PER2	-2.43115	0.0446906
441	ENSG00000132386	SERPINF1	3.04681	0.0254046
442	ENSG00000132436	FIGNL1	2.89542	0.0245044
443	ENSG00000132530	XAF1	4.76805	0.0120015
444	ENSG00000132563	REEP2	-2.56424	0.035474
445	ENSG00000132581	SDF2	2.54711	0.0361131
446	ENSG00000132613	MTSS2	-3.39012	0.0122498
447	ENSG00000132622	HSPA12B	-4.19806	0.00865076
448	ENSG00000132646	PCNA	2.43102	0.0425798
449	ENSG00000132664	POLR3F	2.42699	0.0449849
450	ENSG00000132670	PTPRA	-2.82065	0.0237971
451	ENSG00000132746	ALDH3B2	-3.97513	0.0117538
452	ENSG00000132780	NASP	2.43462	0.04237
453	ENSG00000132819	RBM38	-2.54665	0.0361131
454	ENSG00000132846	ZBED3	-3.16722	0.0139834
455	ENSG00000133111	RFXAP	-2.87549	0.02196
456	ENSG00000133131	MORC4	-2.67861	0.0292096
457	ENSG00000133243	BTBD2	-2.92382	0.0201513
458	ENSG00000133250	ZNF414	-2.3735	0.046949
459	ENSG00000133275	CSNK1G2	-2.43796	0.0420613
460	ENSG00000133302	SLF1	2.57261	0.0353232
461	ENSG00000133315	MACROD1	-2.88606	0.0211847
462	ENSG00000133321	PLAAT4	3.6131	0.00904261
463	ENSG00000133597	ADCK2	-2.43799	0.0422958
464	ENSG00000133627	ACTR3B	-2.54309	0.0361569
465	ENSG00000133639	BTG1	-2.71045	0.0280626
466	ENSG00000133740	E2F5	-2.81054	0.0242463
467	ENSG00000133794	ARNTL	-2.4562	0.0411229
468	ENSG00000133812	SBF2	-2.37607	0.0464144
469	ENSG00000133818	RRAS2	-2.4637	0.0403809
470	ENSG00000133985	TTC9	-2.85112	0.0236739
471	ENSG00000134278	SPIRE1	-2.54776	0.0361131
472	ENSG00000134339	SAA2	2.44582	0.041877
473	ENSG00000134363	FST	-3.2925	0.012246
474	ENSG00000134452	FBH1	-2.81437	0.024016
475	ENSG00000134461	ANKRD16	-2.85688	0.0225434
476	ENSG00000134463	ECHDC3	-3.18477	0.0134909
477	ENSG00000134545	KLRC1	2.65078	0.0380328
478	ENSG00000134686	PHC2	-2.94688	0.0192682
479	ENSG00000134827	TCN1	2.60961	0.041953
480	ENSG00000134851	TMEM165	-3.18134	0.0134909
481	ENSG00000135045	C9orf40	-2.49708	0.0386311
482	ENSG00000135272	MDFIC	-2.70186	0.0283657
483	ENSG00000135298	ADGRB3	6.58145	0.00538606
484	ENSG00000135373	EHF	3.62908	0.00940641
485	ENSG00000135480	KRT7	-2.95969	0.0188621
486	ENSG00000135517	MIP	4.04539	0.0276365
487	ENSG00000135577	NMBR	5.96334	0.0113411
488	ENSG00000135722	FBXL8	-2.74713	0.0280626
489	ENSG00000135736	CCDC102A	-2.63181	0.0319275
490	ENSG00000135925	WNT10A	-3.31582	0.0127078
491	ENSG00000135956	TMEM127	-2.62812	0.0318796
492	ENSG00000135999	EPC2	2.52553	0.0482271
493	ENSG00000136156	ITM2B	-2.57129	0.0345947
494	ENSG00000136158	SPRY2	-3.11522	0.0147371
495	ENSG00000136160	EDNRB	2.98388	0.0226135
496	ENSG00000136235	GPNMB	5.94725	0.0113531
497	ENSG00000136237	RAPGEF5	-3.93964	0.00530861
498	ENSG00000136238	RAC1	-2.92092	0.0201103
499	ENSG00000136240	KDELR2	-2.79576	0.0246808
500	ENSG00000136295	TTYH3	-2.47969	0.0398052
501	ENSG00000136379	ABHD17C	-3.08155	0.0156006
502	ENSG00000136542	GALNT5	2.68605	0.0329202
503	ENSG00000136720	HS6ST1	-2.39491	0.04523
504	ENSG00000136732	GYPC	-2.60881	0.0352103
505	ENSG00000136770	DNAJC1	-2.39756	0.0446906
506	ENSG00000136824	SMC2	3.03919	0.0168059
507	ENSG00000136868	SLC31A1	2.44212	0.0423037
508	ENSG00000136930	PSMB7	2.41543	0.0435268
509	ENSG00000136932	TRMO	2.69616	0.0298458
510	ENSG00000136943	CTSV	2.36565	0.0481911
511	ENSG00000136999	CCN3	-2.47618	0.0396957
512	ENSG00000137166	FOXP4	-2.80567	0.0245044
513	ENSG00000137177	KIF13A	-2.94518	0.0193897
514	ENSG00000137198	GMPR	-2.48378	0.0394968
515	ENSG00000137218	FRS3	-2.68913	0.029698
516	ENSG00000137225	CAPN11	4.56621	0.00704314
517	ENSG00000137273	FOXF2	-2.61645	0.0329202
518	ENSG00000137309	HMGA1	-2.70072	0.0283657
519	ENSG00000137393	RNF144B	2.64656	0.0380061
520	ENSG00000137404	NRM	2.65366	0.0315812
521	ENSG00000137502	RAB30	2.51724	0.0493937
522	ENSG00000137601	NEK1	2.4305	0.0446906
523	ENSG00000137692	DCUN1D5	-2.47521	0.0396957
524	ENSG00000137714	FDX1	-2.36254	0.0473638
525	ENSG00000137752	CASP1	3.64282	0.0113411
526	ENSG00000137760	ALKBH8	2.47955	0.0429967
527	ENSG00000137812	KNL1	2.54297	0.0389521
528	ENSG00000137825	ITPKA	-2.54929	0.0368494
529	ENSG00000137834	SMAD6	-2.62004	0.0336277
530	ENSG00000137959	IFI44L	3.36354	0.041953
531	ENSG00000138073	PREB	-2.58608	0.0339431
532	ENSG00000138080	EMILIN1	-2.54115	0.0383805
533	ENSG00000138083	SIX3	-2.72266	0.0423037
534	ENSG00000138092	CENPO	2.3844	0.0487581
535	ENSG00000138135	CH25H	3.01834	0.039096
536	ENSG00000138182	KIF20B	2.69949	0.0284055
537	ENSG00000138271	GPR87	3.52619	0.0166483
538	ENSG00000138316	ADAMTS14	-2.44162	0.0422932
539	ENSG00000138347	MYPN	3.77922	0.0242463
540	ENSG00000138381	ASNSD1	2.37375	0.0469617
541	ENSG00000138398	PPIG	2.37078	0.0469516
542	ENSG00000138463	SLC49A4	-2.57638	0.0345947
543	ENSG00000138495	COX17	2.40112	0.0446906
544	ENSG00000138593	SECISBP2L	2.85103	0.0264548
545	ENSG00000138606	SHF	-3.45177	0.0212893
546	ENSG00000138658	ZGRF1	2.56627	0.040729
547	ENSG00000138778	CENPE	2.8925	0.0212893
548	ENSG00000139289	PHLDA1	-2.68745	0.028865
549	ENSG00000139292	LGR5	-3.08076	0.0283657
550	ENSG00000139370	SLC15A4	-2.88179	0.0212713
551	ENSG00000139597	N4BP2L1	-3.89074	0.00530861
552	ENSG00000139618	BRCA2	2.56179	0.0361131
553	ENSG00000139668	WDFY2	-2.43532	0.0422827
554	ENSG00000139737	SLAIN1	-2.43706	0.0423037
555	ENSG00000139880	CDH24	-2.62559	0.0332584
556	ENSG00000139899	CBLN3	4.66101	0.0433931
557	ENSG00000140022	STON2	3.07919	0.0330348
558	ENSG00000140280	LYSMD2	-3.01627	0.0172468
559	ENSG00000140365	COMMD4	2.54761	0.0361131
560	ENSG00000140367	UBE2Q2	-2.47308	0.03987
561	ENSG00000140545	MFGE8	-2.45638	0.0409888
562	ENSG00000140564	FURIN	-2.50929	0.0381539
563	ENSG00000140650	PMM2	3.6067	0.00904261
564	ENSG00000140830	TXNL4B	2.41919	0.0462602
565	ENSG00000140848	CPNE2	-2.97014	0.0186525
566	ENSG00000140931	CMTM3	-2.5034	0.0383805
567	ENSG00000141378	PTRH2	2.35395	0.0479786
568	ENSG00000141429	GALNT1	-2.6385	0.0313798
569	ENSG00000141448	GATA6	-2.71463	0.0281916
570	ENSG00000141452	RMC1	-2.59653	0.0335455
571	ENSG00000141499	WRAP53	2.34088	0.0491076
572	ENSG00000141569	TRIM65	-2.49433	0.0388463
573	ENSG00000141753	IGFBP4	-3.53804	0.00904261
574	ENSG00000141933	TPGS1	-2.8313	0.0234307
575	ENSG00000142208	AKT1	-2.56173	0.0351484
576	ENSG00000142233	NTN5	-4.72884	0.00309822
577	ENSG00000142252	GEMIN7	2.47618	0.0402784
578	ENSG00000142279	WTIP	-2.49072	0.0428644
579	ENSG00000142396	ERVK3-1	2.80553	0.0260508
580	ENSG00000142453	CARM1	-2.93724	0.0197233
581	ENSG00000142507	PSMB6	2.3694	0.0467313
582	ENSG00000142544	CTU1	-2.84036	0.0229112
583	ENSG00000142731	PLK4	2.73816	0.0287522
584	ENSG00000142765	SYTL1	-2.6488	0.031292
585	ENSG00000142794	NBPF3	-2.4792	0.0396957
586	ENSG00000142798	HSPG2	-2.42638	0.0437735
587	ENSG00000143093	STRIP1	-2.42483	0.0432335
588	ENSG00000143162	CREG1	-2.58343	0.0340953
589	ENSG00000143194	MAEL	-2.58589	0.0342531
590	ENSG00000143387	CTSK	2.88094	0.0427914
591	ENSG00000143401	ANP32E	2.50672	0.0383805
592	ENSG00000143622	RIT1	2.46507	0.0409888
593	ENSG00000143631	FLG	7.57422	0.00106444
594	ENSG00000143768	LEFTY2	-4.03975	0.00635157
595	ENSG00000143845	ETNK2	-2.57995	0.0345947
596	ENSG00000143862	ARL8A	-2.96334	0.018903
597	ENSG00000143882	ATP6V1C2	-2.58264	0.0371849
598	ENSG00000143942	CHAC2	2.63224	0.0326793
599	ENSG00000144034	TPRKB	2.35021	0.0480996
600	ENSG00000144158	AL078621.1	2.45254	0.0432621
601	ENSG00000144230	GPR17	3.75276	0.0106685
602	ENSG00000144278	GALNT13	-2.85032	0.0228466
603	ENSG00000144395	CCDC150	2.62261	0.0363986
604	ENSG00000144481	TRPM8	5.04976	0.0292096
605	ENSG00000144677	CTDSPL	-2.88493	0.0211904
606	ENSG00000145014	TMEM44	-2.59772	0.0336631
607	ENSG00000145040	UCN2	3.42196	0.0109873
608	ENSG00000145088	EAF2	2.48894	0.041953
609	ENSG00000145331	TRMT10A	3.23741	0.0162123
610	ENSG00000145703	IQGAP2	-2.71003	0.0283657
611	ENSG00000145833	DDX46	2.54152	0.0364654
612	ENSG00000145860	RNF145	-2.50902	0.0380187
613	ENSG00000146066	HIGD2A	2.32885	0.0499018
614	ENSG00000146242	TPBG	-2.62345	0.0320547
615	ENSG00000146278	PNRC1	-2.57207	0.0345947
616	ENSG00000146374	RSPO3	-3.11141	0.0254371
617	ENSG00000146386	ABRACL	2.38526	0.0459236
618	ENSG00000146411	SLC2A12	2.86202	0.0402348
619	ENSG00000146535	GNA12	-2.63364	0.0314682
620	ENSG00000146666	LINC00525	5.18745	0.0256093
621	ENSG00000146674	IGFBP3	-3.65685	0.00709897
622	ENSG00000146678	IGFBP1	-2.33179	0.0493937
623	ENSG00000146729	NIPSNAP2	-2.38909	0.0451414
624	ENSG00000146858	ZC3HAV1L	-2.33393	0.0496909
625	ENSG00000147119	CHST7	-2.70751	0.0283327
626	ENSG00000147475	ERLIN2	2.37733	0.0497258
627	ENSG00000147676	MAL2	-2.96668	0.0186525
628	ENSG00000148120	AOPEP	-2.72637	0.0272501
629	ENSG00000148341	SH3GLB2	-2.7603	0.0261678
630	ENSG00000148450	MSRB2	-2.61259	0.0329119
631	ENSG00000148655	LRMDA	-2.74333	0.0269203
632	ENSG00000148677	ANKRD1	4.31032	0.0027149
633	ENSG00000148926	ADM	-2.727	0.0272501
634	ENSG00000149177	PTPRJ	-2.68371	0.0291377
635	ENSG00000149231	CCDC82	2.79839	0.0248688
636	ENSG00000149243	KLHL35	-2.46756	0.0463616
637	ENSG00000149346	SLX4IP	2.78909	0.0265642
638	ENSG00000149548	CCDC15	2.42162	0.0473818
639	ENSG00000149573	MPZL2	3.26494	0.0263418
640	ENSG00000149806	FAU	2.47144	0.03987
641	ENSG00000149968	MMP3	2.96599	0.0473818
642	ENSG00000150281	CTF1	-3.26547	0.0125602
643	ENSG00000150722	PPP1R1C	5.15325	0.00362202
644	ENSG00000150756	ATPSCKMT	3.03588	0.0182726
645	ENSG00000150773	PIH1D2	2.817	0.0283657
646	ENSG00000150779	TIMM8B	2.51984	0.0374838
647	ENSG00000150782	IL18	3.15145	0.0147994
648	ENSG00000150995	ITPR1	2.40365	0.0488723
649	ENSG00000151353	TMEM18	2.36698	0.0472483
650	ENSG00000151461	UPF2	2.65398	0.0317531
651	ENSG00000151468	CCDC3	-3.10812	0.0150774
652	ENSG00000151693	ASAP2	-2.6349	0.0314462
653	ENSG00000151748	SAV1	-2.49729	0.0386311
654	ENSG00000152076	CCDC74B	-2.54142	0.0367919
655	ENSG00000152128	TMEM163	-3.35301	0.0113411
656	ENSG00000152253	SPC25	2.90135	0.0207563
657	ENSG00000152518	ZFP36L2	-3.20026	0.0132787
658	ENSG00000152620	NADK2	-2.69867	0.0283657
659	ENSG00000152932	RAB3C	5.81053	0.0128652
660	ENSG00000153044	CENPH	-2.47406	0.0398052
661	ENSG00000153233	PTPRR	3.0791	0.0205585
662	ENSG00000153237	CCDC148	4.07849	0.00909125
663	ENSG00000153684	GOLGA8F	3.20887	0.0346114
664	ENSG00000153714	LURAP1L	-3.12549	0.0147371
665	ENSG00000153976	HS3ST3A1	-2.70587	0.0371099
666	ENSG00000154065	ANKRD29	-2.36206	0.0473818
667	ENSG00000154102	C16orf74	-2.38729	0.0452397
668	ENSG00000154124	OTULIN	-2.48284	0.039514
669	ENSG00000154188	ANGPT1	3.22279	0.0276602
670	ENSG00000154263	ABCA10	3.19817	0.0260508
671	ENSG00000154274	C4orf19	-2.5706	0.0350646
672	ENSG00000154451	GBP5	3.70281	0.020444
673	ENSG00000154856	APCDD1	-3.65605	0.0143166
674	ENSG00000154930	ACSS1	-3.61193	0.00828504
675	ENSG00000155367	PPM1J	-2.76417	0.0280881
676	ENSG00000155368	DBI	2.54382	0.0361131
677	ENSG00000155380	SLC16A1	2.85487	0.0358458
678	ENSG00000155754	C2CD6	2.9327	0.0386311
679	ENSG00000155970	MICU3	-2.8404	0.0236739
680	ENSG00000156026	MCU	-2.58601	0.0340669
681	ENSG00000156042	CFAP70	3.43158	0.0216634
682	ENSG00000156381	ANKRD9	-2.82227	0.0237971
683	ENSG00000156453	PCDH1	-2.48883	0.041877
684	ENSG00000156804	FBXO32	-3.1036	0.0147994
685	ENSG00000156876	SASS6	2.43817	0.0433285
686	ENSG00000157168	NRG1	-2.62699	0.0318796
687	ENSG00000157350	ST3GAL2	-2.51145	0.0380737
688	ENSG00000157557	ETS2	-2.68845	0.0289841
689	ENSG00000157613	CREB3L1	-2.77388	0.025668
690	ENSG00000157680	DGKI	5.68302	0.0146902
691	ENSG00000157833	GAREM2	-2.9862	0.0230516
692	ENSG00000157954	WIPI2	-2.84519	0.0227002
693	ENSG00000158050	DUSP2	-3.06602	0.0167162
694	ENSG00000158122	PRXL2C	-2.9975	0.0177737
695	ENSG00000158234	FAIM	2.39275	0.0459236
696	ENSG00000158246	TENT5B	-2.82253	0.0240856
697	ENSG00000158292	GPR153	-2.38455	0.0473818
698	ENSG00000158458	NRG2	-2.77442	0.0337675
699	ENSG00000158717	RNF166	-2.37634	0.0462888
700	ENSG00000158825	CDA	3.14859	0.0147994
701	ENSG00000158828	PINK1	-3.5059	0.00904261
702	ENSG00000159128	IFNGR2	-2.47125	0.03987
703	ENSG00000159314	ARHGAP27	-2.66493	0.0301868
704	ENSG00000159363	ATP13A2	-2.56874	0.0347988
705	ENSG00000159377	PSMB4	2.45732	0.040827
706	ENSG00000159461	AMFR	-2.68306	0.0291645
707	ENSG00000159692	CTBP1	-2.89453	0.0207962
708	ENSG00000159714	ZDHHC1	-3.14053	0.0145544
709	ENSG00000159733	ZFYVE28	-2.94171	0.0194753
710	ENSG00000160072	ATAD3B	-2.47984	0.0396474
711	ENSG00000160075	SSU72	-2.46438	0.0402856
712	ENSG00000160097	FNDC5	-3.25176	0.0170775
713	ENSG00000160113	NR2F6	-2.66534	0.0300489
714	ENSG00000160124	CCDC58	2.88584	0.0271537
715	ENSG00000160161	CILP2	-3.17373	0.0201103
716	ENSG00000160180	TFF3	2.69792	0.0353553
717	ENSG00000160209	PDXK	-2.81892	0.0237971
718	ENSG00000160229	ZNF66	2.74631	0.0435268
719	ENSG00000160271	RALGDS	-3.4319	0.00981138
720	ENSG00000160345	C9orf116	2.55655	0.0379732
721	ENSG00000160360	GPSM1	-2.75009	0.0268438
722	ENSG00000160813	PPP1R35	-3.10563	0.0147994
723	ENSG00000160818	GPATCH4	2.60509	0.0333726
724	ENSG00000160961	ZNF333	-2.33543	0.0493937
725	ENSG00000160999	SH2B2	-3.34071	0.0116278
726	ENSG00000161013	MGAT4B	-2.94197	0.0193897
727	ENSG00000161091	MFSD12	-3.06896	0.0157667
728	ENSG00000161103	AC008132.1	3.16774	0.0367611
729	ENSG00000161798	AQP5	-3.0718	0.0205209
730	ENSG00000161813	LARP4	2.64497	0.0319894
731	ENSG00000161904	LEMD2	-3.25019	0.0127078
732	ENSG00000161914	ZNF653	-2.52432	0.0386311
733	ENSG00000161980	POLR3K	2.42293	0.0433931
734	ENSG00000162073	PAQR4	-2.71605	0.0280626
735	ENSG00000162337	LRP5	-3.50924	0.00904261
736	ENSG00000162366	PDZK1IP1	2.96811	0.0196199
737	ENSG00000162377	COA7	2.44441	0.0422827
738	ENSG00000162520	SYNC	-3.75333	0.00704314
739	ENSG00000162576	MXRA8	-3.2991	0.0121719
740	ENSG00000162591	MEGF6	-2.80365	0.0283657
741	ENSG00000162694	EXTL2	2.49338	0.0395365
742	ENSG00000162779	AXDND1	3.22774	0.048372
743	ENSG00000162783	IER5	-2.76519	0.0259625
744	ENSG00000162804	SNED1	-2.8001	0.0257833
745	ENSG00000163026	WDCP	2.84112	0.0290296
746	ENSG00000163032	VSNL1	2.87102	0.0296169
747	ENSG00000163162	RNF149	-2.61555	0.0326522
748	ENSG00000163312	HELQ	2.50624	0.0402117
749	ENSG00000163319	MRPS18C	2.44042	0.0421375
750	ENSG00000163453	IGFBP7	-2.75721	0.0263132
751	ENSG00000163467	TSACC	2.42592	0.0489081
752	ENSG00000163491	NEK10	4.26293	0.0131887
753	ENSG00000163507	CIP2A	2.47745	0.0403809
754	ENSG00000163535	SGO2	2.47096	0.0404119
755	ENSG00000163607	GTPBP8	2.47731	0.040729
756	ENSG00000163631	ALB	4.69116	0.0420613
757	ENSG00000163661	PTX3	-2.53393	0.0366864
758	ENSG00000163719	MTMR14	-3.12076	0.0147371
759	ENSG00000163785	RYK	-2.4312	0.0425798
760	ENSG00000163794	UCN	-3.14178	0.0147371
761	ENSG00000163870	TPRA1	-2.63933	0.0313922
762	ENSG00000163888	CAMK2N2	-2.73558	0.0442597
763	ENSG00000163898	LIPH	2.64975	0.0366159
764	ENSG00000163918	RFC4	2.39466	0.0450806
765	ENSG00000163932	PRKCD	-2.61256	0.0329202
766	ENSG00000163950	SLBP	-2.52333	0.0371849
767	ENSG00000163964	PIGX	-2.48926	0.0390469
768	ENSG00000163993	S100P	4.21494	0.00423392
769	ENSG00000164032	H2AZ1	2.58376	0.0340669
770	ENSG00000164105	SAP30	-2.68076	0.0291645
771	ENSG00000164171	ITGA2	2.36179	0.0473818
772	ENSG00000164379	FOXQ1	-3.49318	0.00904261
773	ENSG00000164400	CSF2	2.37968	0.0461021
774	ENSG00000164403	SHROOM1	-2.52826	0.0371849
775	ENSG00000164442	CITED2	-3.33969	0.0113531
776	ENSG00000164465	DCBLD1	-2.51117	0.0379732
777	ENSG00000164512	ANKRD55	6.21749	0.00904261
778	ENSG00000164543	STK17A	-2.96109	0.0188012
779	ENSG00000164611	PTTG1	2.3301	0.0494723
780	ENSG00000164638	SLC29A4	-3.33871	0.0125602
781	ENSG00000164746	C7orf57	5.30817	0.0220359
782	ENSG00000164778	EN2	-3.87806	0.00596459
783	ENSG00000164849	GPR146	-2.96655	0.021234
784	ENSG00000164983	TMEM65	-2.7705	0.0258837
785	ENSG00000164989	CCDC171	3.22062	0.0227955
786	ENSG00000165030	NFIL3	-3.12788	0.0147371
787	ENSG00000165102	HGSNAT	-2.66512	0.0302109
788	ENSG00000165312	OTUD1	-2.93592	0.0197233
789	ENSG00000165516	KLHDC2	-2.85767	0.0221512
790	ENSG00000165527	ARF6	-2.33418	0.0491243
791	ENSG00000165568	AKR1E2	-2.4445	0.0424289
792	ENSG00000165716	DIPK1B	-3.23697	0.0131887
793	ENSG00000165724	ZMYND19	-2.81953	0.0237971
794	ENSG00000165752	STK32C	-2.72257	0.0275108
795	ENSG00000165802	NSMF	-2.87487	0.0216634
796	ENSG00000165813	CCDC186	2.68188	0.031292
797	ENSG00000165949	IFI27	3.57845	0.00904261
798	ENSG00000166004	CEP295	2.61325	0.0335455
799	ENSG00000166033	HTRA1	-3.23875	0.0128652
800	ENSG00000166086	JAM3	3.51428	0.0349401
801	ENSG00000166126	AMN	-4.2823	0.00305797
802	ENSG00000166145	SPINT1	-3.12496	0.0147371
803	ENSG00000166250	CLMP	-2.42947	0.0427365
804	ENSG00000166337	TAF10	-2.92376	0.0200395
805	ENSG00000166343	MSS51	5.82215	0.0128652
806	ENSG00000166582	CENPV	-2.70054	0.0283657
807	ENSG00000166592	RRAD	-3.99885	0.0039419
808	ENSG00000166685	COG1	-2.7316	0.0271537
809	ENSG00000166741	NNMT	2.43557	0.0433285
810	ENSG00000166801	FAM111A	2.46034	0.0413632
811	ENSG00000166803	PCLAF	2.60425	0.0334662
812	ENSG00000166819	PLIN1	-3.03813	0.0290278
813	ENSG00000166848	TERF2IP	-2.65799	0.0302323
814	ENSG00000167011	NAT16	-3.35455	0.0128667
815	ENSG00000167077	MEI1	2.85802	0.0294879
816	ENSG00000167136	ENDOG	-3.04389	0.0166483
817	ENSG00000167186	COQ7	-2.36274	0.0473818
818	ENSG00000167258	CDK12	2.50628	0.0407794
819	ENSG00000167272	POP5	2.57777	0.0345947
820	ENSG00000167393	PPP2R3B	-3.28227	0.0125065
821	ENSG00000167476	JSRP1	-3.24251	0.0238063
822	ENSG00000167536	DHRS13	-2.50333	0.0386311
823	ENSG00000167543	TP53I13	-2.77444	0.0256093
824	ENSG00000167615	LENG8	-2.4305	0.0437758
825	ENSG00000167617	CDC42EP5	-3.60888	0.0156625
826	ENSG00000167693	NXN	-2.60713	0.0333163
827	ENSG00000167702	KIFC2	-3.02939	0.0172468
828	ENSG00000167703	SLC43A2	-2.54821	0.0361131
829	ENSG00000167733	HSD11B1L	-2.55304	0.0361131
830	ENSG00000167799	NUDT8	-2.407	0.0443291
831	ENSG00000167900	TK1	2.65544	0.0303659
832	ENSG00000167920	TMEM99	2.42678	0.0433285
833	ENSG00000167962	ZNF598	-2.71879	0.0280626
834	ENSG00000167969	ECI1	-2.94697	0.0192682
835	ENSG00000167994	RAB3IL1	-2.57593	0.0361131
836	ENSG00000167995	BEST1	-2.65434	0.048372
837	ENSG00000167996	FTH1	-3.10436	0.0147994
838	ENSG00000168040	FADD	-2.39457	0.0448705
839	ENSG00000168056	LTBP3	-2.94093	0.0196199
840	ENSG00000168061	SAC3D1	-2.3739	0.0464144
841	ENSG00000168077	SCARA3	-2.45207	0.0413632
842	ENSG00000168140	VASN	-2.93337	0.0197233
843	ENSG00000168159	RNF187	-2.79369	0.024798
844	ENSG00000168234	TTC39C	-2.75535	0.0264548
845	ENSG00000168286	THAP11	-2.39619	0.0447578
846	ENSG00000168306	ACOX2	2.61434	0.0330223
847	ENSG00000168487	BMP1	-2.46728	0.0403809
848	ENSG00000168496	FEN1	2.54783	0.0361131
849	ENSG00000168528	SERINC2	-2.63574	0.0314462
850	ENSG00000168676	KCTD19	-3.40853	0.0367919
851	ENSG00000168702	LRP1B	-2.5521	0.0388345
852	ENSG00000168763	CNNM3	-2.5053	0.0384425
853	ENSG00000168802	CHTF8	-2.34105	0.0486713
854	ENSG00000168874	ATOH8	-3.38209	0.0114871
855	ENSG00000168918	INPP5D	3.45084	0.0380187
856	ENSG00000168936	TMEM129	-3.26093	0.0125602
857	ENSG00000169026	SLC49A3	-2.68334	0.0292793
858	ENSG00000169085	VXN	3.62829	0.0146902
859	ENSG00000169122	FAM110B	-2.53582	0.0395013
860	ENSG00000169155	ZBTB43	2.37818	0.0479593
861	ENSG00000169213	RAB3B	-3.03877	0.0227002
862	ENSG00000169245	CXCL10	5.6895	0.00113104
863	ENSG00000169248	CXCL11	3.43022	0.0379726
864	ENSG00000169379	ARL13B	2.41974	0.0442844
865	ENSG00000169583	CLIC3	-2.61083	0.0329202
866	ENSG00000169607	CKAP2L	2.74239	0.0271537
867	ENSG00000169641	LUZP1	2.45836	0.0411866
868	ENSG00000169660	HEXD	-2.87515	0.021807
869	ENSG00000169682	SPNS1	-3.11693	0.0192682
870	ENSG00000169684	CHRNA5	-2.48993	0.0391792
871	ENSG00000169718	DUS1L	-3.14416	0.0143166
872	ENSG00000169762	TAPT1	-2.85323	0.0226135
873	ENSG00000169857	AVEN	-2.77506	0.0256093
874	ENSG00000169989	TIGD4	5.56357	0.0165014
875	ENSG00000170166	HOXD4	3.72351	0.0268438
876	ENSG00000170275	CRTAP	-2.35526	0.0477883
877	ENSG00000170293	CMTM8	-2.56145	0.0353553
878	ENSG00000170364	SETMAR	-2.39815	0.0448705
879	ENSG00000170373	CST1	2.59392	0.0337638
880	ENSG00000170385	SLC30A1	-2.32782	0.0498045
881	ENSG00000170439	METTL7B	4.0763	0.00709897
882	ENSG00000170465	KRT6C	-2.98964	0.0387571
883	ENSG00000170468	RIOX1	-2.57532	0.0345947
884	ENSG00000170485	NPAS2	-2.51619	0.0377123
885	ENSG00000170577	SIX2	-3.22525	0.0131887
886	ENSG00000170632	ARMC10	-3.22781	0.0128667
887	ENSG00000170801	HTRA3	-3.52237	0.00904261
888	ENSG00000170846	AC093323.1	-2.52752	0.0371849
889	ENSG00000170909	OSCAR	-2.79909	0.0271537
890	ENSG00000171033	PKIA	-2.37802	0.0461903
891	ENSG00000171119	NRTN	-2.42091	0.0448705
892	ENSG00000171206	TRIM8	-2.37969	0.0461021
893	ENSG00000171223	JUNB	-2.42895	0.0425798
894	ENSG00000171310	CHST11	-2.3653	0.0471548
895	ENSG00000171311	EXOSC1	2.36977	0.0469617
896	ENSG00000171320	ESCO2	2.51987	0.0386311
897	ENSG00000171388	APLN	-3.00909	0.0229086
898	ENSG00000171428	NAT1	3.70531	0.00904261
899	ENSG00000171450	CDK5R2	-3.06815	0.0183714
900	ENSG00000171612	SLC25A33	-2.74571	0.0266955
901	ENSG00000171621	SPSB1	-2.66001	0.0302323
902	ENSG00000171703	TCEA2	-2.55507	0.0353619
903	ENSG00000171729	TMEM51	-2.33537	0.0493937
904	ENSG00000171840	NINJ2	3.00871	0.0185666
905	ENSG00000171860	C3AR1	3.10552	0.024397
906	ENSG00000171984	SHLD1	2.65823	0.0345947
907	ENSG00000172006	ZNF554	-2.43228	0.0441249
908	ENSG00000172123	SLFN12	2.6608	0.0346119
909	ENSG00000172183	ISG20	2.36834	0.0474703
910	ENSG00000172201	ID4	-3.45268	0.00977188
911	ENSG00000172216	CEBPB	-3.50079	0.00904261
912	ENSG00000172244	C5orf34	2.43213	0.0461903
913	ENSG00000172292	CERS6	-2.36493	0.0473818
914	ENSG00000172296	SPTLC3	4.25652	0.00562842
915	ENSG00000172301	COPRS	-2.53005	0.0368842
916	ENSG00000172345	STARD5	2.89827	0.041877
917	ENSG00000172382	PRSS27	-2.47171	0.0480652
918	ENSG00000172425	TTC36	-2.8989	0.0264548
919	ENSG00000172466	ZNF24	2.76827	0.0265934
920	ENSG00000172586	CHCHD1	2.5044	0.0383805
921	ENSG00000172602	RND1	5.60553	0.0156625
922	ENSG00000172717	FAM71D	6.54334	0.00562842
923	ENSG00000172748	ZNF596	2.56949	0.0480652
924	ENSG00000172809	RPL38	2.50496	0.0381623
925	ENSG00000172971	UNC93B3	-3.20343	0.0151259
926	ENSG00000172986	GXYLT2	-3.35202	0.0113411
927	ENSG00000173020	GRK2	-2.6855	0.0290296
928	ENSG00000173153	ESRRA	-2.93822	0.0196199
929	ENSG00000173156	RHOD	-2.63049	0.0316847
930	ENSG00000173227	SYT12	-3.22707	0.0156006
931	ENSG00000173401	GLIPR1L1	-2.5722	0.0456119
932	ENSG00000173432	SAA1	2.70307	0.0283384
933	ENSG00000173442	EHBP1L1	-3.12434	0.0147371
934	ENSG00000173457	PPP1R14B	-2.53723	0.0363986
935	ENSG00000173598	NUDT4	-2.47553	0.0396957
936	ENSG00000173621	LRFN4	-2.46923	0.0404205
937	ENSG00000173681	BCLAF3	-2.44711	0.0420613
938	ENSG00000173727	AP000769.1	2.53276	0.0379726
939	ENSG00000173744	AGFG1	-2.36636	0.0470245
940	ENSG00000173846	PLK3	-3.07874	0.0156203
941	ENSG00000173905	GOLIM4	-2.47808	0.03987
942	ENSG00000173918	C1QTNF1	-2.69561	0.0314462
943	ENSG00000173966	AC095040.1	4.70636	0.0414889
944	ENSG00000174080	CTSF	-3.40471	0.0103663
945	ENSG00000174173	TRMT10C	2.33358	0.0495257
946	ENSG00000174238	PITPNA	-2.48046	0.0395365
947	ENSG00000174307	PHLDA3	-2.63683	0.0314462
948	ENSG00000174428	GTF2IRD2B	-2.98468	0.0182726
949	ENSG00000174521	TTC9B	-3.70069	0.0134909
950	ENSG00000174721	FGFBP3	-2.47722	0.0407124
951	ENSG00000175183	CSRP2	2.53386	0.0370378
952	ENSG00000175274	TP53I11	-2.40884	0.0447578
953	ENSG00000175305	CCNE2	2.43768	0.0435603
954	ENSG00000175315	CST6	-2.5125	0.0379732
955	ENSG00000175470	PPP2R2D	-2.63687	0.0314462
956	ENSG00000175538	KCNE3	-2.82743	0.0449264
957	ENSG00000175573	C11orf68	-2.67379	0.029486
958	ENSG00000175592	FOSL1	-2.41721	0.0433931
959	ENSG00000175595	ERCC4	2.69358	0.0314462
960	ENSG00000175602	CCDC85B	-2.3299	0.0494687
961	ENSG00000175643	RMI2	-2.82664	0.0236605
962	ENSG00000175820	CCDC168	4.69124	0.0420613
963	ENSG00000175874	CREG2	-2.83176	0.0284055
964	ENSG00000176022	B3GALT6	-2.70943	0.0281134
965	ENSG00000176046	NUPR1	3.48642	0.0116621
966	ENSG00000176208	ATAD5	2.6585	0.0319275
967	ENSG00000176396	EID2	-2.73126	0.0271537
968	ENSG00000176788	BASP1	-3.11903	0.0147371
969	ENSG00000176894	PXMP2	-2.4723	0.03987
970	ENSG00000176903	PNMA1	-2.7635	0.0260117
971	ENSG00000176973	FAM89B	-2.66908	0.0300489
972	ENSG00000177030	DEAF1	-2.54169	0.0361131
973	ENSG00000177138	FAM9B	3.82161	0.0361131
974	ENSG00000177144	NUDT4B	-3.17087	0.0139092
975	ENSG00000177374	HIC1	-3.36313	0.0125364
976	ENSG00000177666	PNPLA2	-2.46826	0.0402348
977	ENSG00000177679	SRRM3	-2.67448	0.032094
978	ENSG00000177989	ODF3B	-2.86945	0.0219023
979	ENSG00000178026	LRRC75B	-3.87418	0.00530861
980	ENSG00000178177	LCORL	-3.29228	0.012246
981	ENSG00000178199	ZC3H12D	-2.75577	0.0353619
982	ENSG00000178445	GLDC	5.54878	0.0168059
983	ENSG00000178449	COX14	2.5072	0.0383805
984	ENSG00000178467	P4HTM	-2.3498	0.0480758
985	ENSG00000178585	CTNNBIP1	-2.648	0.030945
986	ENSG00000178605	GTPBP6	-2.89146	0.0209857
987	ENSG00000178660	ARMC10P1	-3.17007	0.0139092
988	ENSG00000178752	ERFE	-2.48364	0.0396961
989	ENSG00000178982	EIF3K	2.60821	0.0330182
990	ENSG00000179044	EXOC3L1	-3.08573	0.0186525
991	ENSG00000179083	FAM133A	4.23804	0.0132037
992	ENSG00000179242	CDH4	-2.37252	0.0467135
993	ENSG00000179364	PACS2	-2.32713	0.0499018
994	ENSG00000179403	VWA1	-3.58212	0.00859435
995	ENSG00000179431	FJX1	-2.71893	0.027644
996	ENSG00000179476	C14orf28	-2.84387	0.0229112
997	ENSG00000179632	MAF1	-2.49639	0.0386311
998	ENSG00000179674	ARL14	5.74813	0.0134909
999	ENSG00000179750	APOBEC3B	2.48618	0.0395365
1000	ENSG00000179862	CITED4	-3.82677	0.00562842
1001	ENSG00000179935	LINC00652	5.59804	0.0157321
1002	ENSG00000179965	ZNF771	-2.76886	0.0258293
1003	ENSG00000179967	PPP1R14BP3	-2.51811	0.0373956
1004	ENSG00000180190	TDRP	-2.70257	0.0283968
1005	ENSG00000180233	ZNRF2	-3.13283	0.0147371
1006	ENSG00000180354	MTURN	-2.48117	0.0396957
1007	ENSG00000180573	H2AC6	2.39958	0.0456581
1008	ENSG00000180596	H2BC4	2.94277	0.0256093
1009	ENSG00000181274	FRAT2	-2.7362	0.0271537
1010	ENSG00000181355	OFCC1	5.2931	0.0225434
1011	ENSG00000181409	AATK	-3.14002	0.0388416
1012	ENSG00000181444	ZNF467	-3.12826	0.0164838
1013	ENSG00000181544	FANCB	3.50413	0.0101991
1014	ENSG00000181741	FDX1P1	-2.73274	0.0287074
1015	ENSG00000181819	KCTD9P2	5.95429	0.0113411
1016	ENSG00000181982	CCDC149	-2.60442	0.0335455
1017	ENSG00000182087	TMEM259	-3.52246	0.00904261
1018	ENSG00000182118	FAM89A	-2.42509	0.0429687
1019	ENSG00000182272	B4GALNT4	-2.68256	0.0314462
1020	ENSG00000182287	AP1S2	-3.10907	0.0147994
1021	ENSG00000182325	FBXL6	-2.5784	0.0344389
1022	ENSG00000182512	GLRX5	-2.44968	0.0411229
1023	ENSG00000182534	MXRA7	-3.10844	0.0147994
1024	ENSG00000182557	SPNS3	2.8434	0.0373207
1025	ENSG00000182580	EPHB3	-2.66549	0.0345477
1026	ENSG00000182584	ACTL10	-2.64207	0.0333701
1027	ENSG00000182600	SNORC	-2.40975	0.0482304
1028	ENSG00000182628	SKA2	2.34252	0.0488723
1029	ENSG00000182871	COL18A1	-2.47967	0.0396957
1030	ENSG00000182890	GLUD2	-2.87599	0.0217892
1031	ENSG00000183032	SLC25A21	2.87724	0.035474
1032	ENSG00000183087	GAS6	-3.67207	0.00705292
1033	ENSG00000183150	GPR19	3.873	0.00977188
1034	ENSG00000183155	RABIF	2.70558	0.0283657
1035	ENSG00000183248	PRR36	-3.47704	0.013742
1036	ENSG00000183439	TRIM61	3.26049	0.0182726
1037	ENSG00000183578	TNFAIP8L3	-2.67198	0.0335523
1038	ENSG00000183617	MRPL54	2.35926	0.047848
1039	ENSG00000183625	CCR3	5.24749	0.0237971
1040	ENSG00000183629	GOLGA8G	3.95484	0.0190761
1041	ENSG00000183684	ALYREF	-2.5525	0.0355375
1042	ENSG00000183780	SLC35F3	-2.64803	0.0309462
1043	ENSG00000183978	COA3	2.42266	0.0432665
1044	ENSG00000184007	PTP4A2	-2.72189	0.0274774
1045	ENSG00000184058	TBX1	-3.87789	0.00530861
1046	ENSG00000184226	PCDH9	2.92107	0.0314462
1047	ENSG00000184232	OAF	-2.83415	0.0231422
1048	ENSG00000184292	TACSTD2	-2.54173	0.0361569
1049	ENSG00000184363	PKP3	-2.48794	0.0392767
1050	ENSG00000184371	CSF1	-3.48793	0.00904261
1051	ENSG00000184451	CCR10	-2.61043	0.0341769
1052	ENSG00000184545	DUSP8	-3.92135	0.00572891
1053	ENSG00000184588	PDE4B	2.72832	0.0344389
1054	ENSG00000184599	TAFA3	-3.78613	0.0132591
1055	ENSG00000184602	SNN	-3.02679	0.0172468
1056	ENSG00000184709	LRRC26	-2.49912	0.0402006
1057	ENSG00000184795	UNC93B5	-2.95045	0.0290278
1058	ENSG00000184887	BTBD6	-2.37378	0.0464746
1059	ENSG00000184897	H1-10	-2.79135	0.0248688
1060	ENSG00000184916	JAG2	-2.69716	0.0311702
1061	ENSG00000184937	WT1	3.69601	0.0170775
1062	ENSG00000184983	NDUFA6	2.57093	0.0346579
1063	ENSG00000184985	SORCS2	-2.78623	0.0256093
1064	ENSG00000184986	TMEM121	-3.21806	0.0147371
1065	ENSG00000185000	DGAT1	-2.77381	0.0256093
1066	ENSG00000185022	MAFF	-2.71518	0.0279584
1067	ENSG00000185069	KRT76	-2.68849	0.0440816
1068	ENSG00000185104	FAF1	-2.52146	0.0372916
1069	ENSG00000185112	FAM43A	-3.31536	0.0121847
1070	ENSG00000185163	DDX51	-2.58465	0.0341769
1071	ENSG00000185250	PPIL6	-2.7375	0.0272569
1072	ENSG00000185261	KIAA0825	3.31519	0.0290366
1073	ENSG00000185272	RBM11	3.87774	0.0210486
1074	ENSG00000185338	SOCS1	-4.52236	0.00113104
1075	ENSG00000185479	KRT6B	-3.08865	0.0334799
1076	ENSG00000185483	ROR1	-3.26733	0.0125602
1077	ENSG00000185515	BRCC3	2.35791	0.0481911
1078	ENSG00000185519	FAM131C	-2.6676	0.0333579
1079	ENSG00000185522	LMNTD2	-2.78242	0.0260812
1080	ENSG00000185523	SPATA45	4.54982	0.0146693
1081	ENSG00000185669	SNAI3	5.7841	0.0131887
1082	ENSG00000185681	MORN5	5.25464	0.0237971
1083	ENSG00000185745	IFIT1	2.7923	0.0256093
1084	ENSG00000185753	CXorf38	-2.44113	0.0419484
1085	ENSG00000185800	DMWD	-2.53587	0.0368842
1086	ENSG00000185860	CCDC190	3.53003	0.0126483
1087	ENSG00000186187	ZNRF1	-2.37992	0.0461472
1088	ENSG00000186222	BLOC1S4	-3.23236	0.0128652
1089	ENSG00000186280	KDM4D	3.48425	0.0146902
1090	ENSG00000186376	ZNF75D	3.3544	0.0205266
1091	ENSG00000186395	KRT10	-2.62905	0.0316505
1092	ENSG00000186496	ZNF396	3.07287	0.0302109
1093	ENSG00000186564	FOXD2	-2.54929	0.0395365
1094	ENSG00000186654	PRR5	-2.74387	0.0433285
1095	ENSG00000186665	C17orf58	-2.36742	0.0469617
1096	ENSG00000186666	BCDIN3D	2.85752	0.0343866
1097	ENSG00000186907	RTN4RL2	-3.31363	0.0128652
1098	ENSG00000187017	ESPN	-2.77825	0.029931
1099	ENSG00000187147	RNF220	-2.59055	0.0337675
1100	ENSG00000187229	AC100800.1	6.06325	0.00987978
1101	ENSG00000187479	C11orf96	-3.20724	0.0209857
1102	ENSG00000187522	HSPA14	2.49136	0.0394484
1103	ENSG00000187796	CARD9	-3.05399	0.0198802
1104	ENSG00000187837	H1-2	3.40917	0.0113411
1105	ENSG00000187952	HS6ST1P1	-3.96246	0.0048396
1106	ENSG00000187954	CYHR1	-2.33409	0.0492095
1107	ENSG00000187961	KLHL17	-2.84081	0.02308
1108	ENSG00000188002	AC026412.1	-2.51223	0.0380328
1109	ENSG00000188015	S100A3	2.69654	0.0292755
1110	ENSG00000188026	RILPL1	-3.0315	0.0170775
1111	ENSG00000188042	ARL4C	-2.34753	0.0481911
1112	ENSG00000188060	RAB42	-2.56764	0.0361131
1113	ENSG00000188064	WNT7B	-2.36781	0.0496909
1114	ENSG00000188290	HES4	-3.10938	0.0147994
1115	ENSG00000188365	AC092171.1	-3.66716	0.0273464
1116	ENSG00000188483	IER5L	-3.03907	0.0168059
1117	ENSG00000188596	CFAP54	3.58124	0.024016
1118	ENSG00000188613	NANOS1	-2.9144	0.0207563
1119	ENSG00000188672	RHCE	-3.14758	0.0147371
1120	ENSG00000188747	NOXA1	-2.36076	0.0477018
1121	ENSG00000188820	CALHM6	-2.45753	0.0418604
1122	ENSG00000188981	MSANTD1	-2.8289	0.0491076
1123	ENSG00000188985	DHFRP1	2.80475	0.0251654
1124	ENSG00000188986	NELFB	-2.55067	0.0360494
1125	ENSG00000188994	ZNF292	2.35555	0.0488723
1126	ENSG00000189057	FAM111B	5.02643	0.000744787
1127	ENSG00000189337	KAZN	-2.85244	0.0226135
1128	ENSG00000196141	SPATS2L	-2.45576	0.040729
1129	ENSG00000196154	S100A4	2.72486	0.0273464
1130	ENSG00000196188	CTSE	3.38273	0.0271537
1131	ENSG00000196196	HRCT1	4.53439	0.0489732
1132	ENSG00000196275	GTF2IRD2	-2.99349	0.0180217
1133	ENSG00000196312	MFSD14C	-3.12248	0.0147371
1134	ENSG00000196335	STK31	3.36682	0.041649
1135	ENSG00000196358	NTNG2	-3.7205	0.00709897
1136	ENSG00000196420	S100A5	3.04112	0.0256093
1137	ENSG00000196421	C20orf204	-3.03936	0.028865
1138	ENSG00000196449	YRDC	-2.8911	0.0209814
1139	ENSG00000196453	ZNF777	-3.30119	0.012246
1140	ENSG00000196456	ZNF775	-3.27975	0.0125602
1141	ENSG00000196547	MAN2A2	-2.74838	0.0271537
1142	ENSG00000196611	MMP1	2.44513	0.046949
1143	ENSG00000196781	TLE1	-2.5595	0.0353232
1144	ENSG00000196812	ZSCAN16	3.22782	0.0156006
1145	ENSG00000196951	SCOC-AS1	2.94018	0.0271537
1146	ENSG00000196972	SMIM10L2B	-2.76946	0.0377129
1147	ENSG00000197061	H4C3	3.91724	0.00479589
1148	ENSG00000197063	MAFG	-2.79798	0.0246099
1149	ENSG00000197119	SLC25A29	-2.61385	0.0329202
1150	ENSG00000197124	ZNF682	2.80189	0.0289841
1151	ENSG00000197245	FAM110D	-3.28602	0.0139092
1152	ENSG00000197279	ZNF165	2.66217	0.0435306
1153	ENSG00000197332	AC008543.1	5.63257	0.0150557
1154	ENSG00000197355	UAP1L1	-2.68673	0.0291645
1155	ENSG00000197451	HNRNPAB	-2.63045	0.0315812
1156	ENSG00000197467	COL13A1	-2.36707	0.0469617
1157	ENSG00000197530	MIB2	-2.81032	0.0242463
1158	ENSG00000197536	IRF1-AS1	-2.67464	0.0300489
1159	ENSG00000197562	RAB40C	-2.51385	0.0379732
1160	ENSG00000197771	MCMBP	-2.59138	0.0337675
1161	ENSG00000197782	ZNF780A	2.5367	0.0448705
1162	ENSG00000197785	ATAD3A	-2.39749	0.0446906
1163	ENSG00000197815	AC122129.1	-4.20932	0.00317717
1164	ENSG00000197816	CCDC180	4.57792	0.0470245
1165	ENSG00000197837	H4-16	3.42034	0.0388416
1166	ENSG00000198055	GRK6	-2.81888	0.0237971
1167	ENSG00000198074	AKR1B10	3.11407	0.0177737
1168	ENSG00000198218	QRICH1	-2.48794	0.039096
1169	ENSG00000198355	PIM3	-2.74766	0.0265934
1170	ENSG00000198416	ZNF658B	3.69758	0.0132787
1171	ENSG00000198435	NRARP	-3.62255	0.00904261
1172	ENSG00000198520	ARMH1	-2.64996	0.0321706
1173	ENSG00000198574	SH2D1B	4.24954	0.0131887
1174	ENSG00000198598	MMP17	-2.64935	0.0396474
1175	ENSG00000198680	TUSC1	-2.82003	0.0238063
1176	ENSG00000198719	DLL1	-3.61789	0.0109007
1177	ENSG00000198728	LDB1	-2.55598	0.0355375
1178	ENSG00000198752	CDC42BPB	-2.39142	0.04523
1179	ENSG00000198863	RUNDC1	-2.33858	0.0488723
1180	ENSG00000198892	SHISA4	-2.33036	0.0497258
1181	ENSG00000198932	GPRASP1	3.87787	0.0209689
1182	ENSG00000198963	RORB	6.04618	0.0102167
1183	ENSG00000199179	MIRLET7I	-2.78598	0.0314462
1184	ENSG00000200488	RN7SKP203	4.89465	0.0345947
1185	ENSG00000201098	RNY1	4.7302	0.0404803
1186	ENSG00000201573	AL118556.1	-3.88789	0.0185666
1187	ENSG00000202415	RN7SKP269	5.05677	0.0290296
1188	ENSG00000203760	CENPW	2.54369	0.0362489
1189	ENSG00000204060	FOXO6	-4.53198	0.00483651
1190	ENSG00000204086	RPA4	5.48418	0.0182043
1191	ENSG00000204103	MAFB	-2.68529	0.0353352
1192	ENSG00000204257	HLA-DMA	2.62044	0.0338203
1193	ENSG00000204315	FKBPL	2.53436	0.0389521
1194	ENSG00000204397	CARD16	4.49169	0.00317618
1195	ENSG00000204574	ABCF1	2.37554	0.0464746
1196	ENSG00000204767	INSYN2B	3.7417	0.03987
1197	ENSG00000204792	LINC01291	3.04218	0.0196748
1198	ENSG00000204991	SPIRE2	-2.85411	0.0226337
1199	ENSG00000205089	CCNI2	-2.92289	0.0371849
1200	ENSG00000205105	COX17P1	2.84216	0.0256093
1201	ENSG00000205181	LINC00654	3.57283	0.0481911
1202	ENSG00000205277	MUC12	5.91448	0.0118446
1203	ENSG00000205309	NT5M	-2.61386	0.0336631
1204	ENSG00000205323	SARNP	-2.75201	0.0396957
1205	ENSG00000205413	SAMD9	2.75778	0.0280881
1206	ENSG00000205436	EXOC3L4	-3.45483	0.0153128
1207	ENSG00000205809	KLRC2	2.69103	0.0302346
1208	ENSG00000205810	KLRC3	2.51769	0.0482201
1209	ENSG00000205930	C21orf62-AS1	2.57074	0.0479593
1210	ENSG00000206147	RPL23AP57	3.54727	0.0329202
1211	ENSG00000206190	ATP10A	-3.09734	0.0236739
1212	ENSG00000206418	RAB12	-2.57664	0.0366864
1213	ENSG00000206530	CFAP44	2.51361	0.0473638
1214	ENSG00000206535	LNP1	3.08168	0.0392572
1215	ENSG00000206588	RNU1-28P	5.78159	0.0131887
1216	ENSG00000206596	RNU1-27P	5.78159	0.0131887
1217	ENSG00000206652	RNU1-1	5.12825	0.0271537
1218	ENSG00000206737	RNVU1-18	4.71241	0.0411229
1219	ENSG00000206828	RNVU1-30	3.88151	0.0156183
1220	ENSG00000211459	MT-RNR1	2.75545	0.0263714
1221	ENSG00000212124	TAS2R19	4.82764	0.0369386
1222	ENSG00000212232	SNORD17	3.5472	0.0219023
1223	ENSG00000212464	SNORA12	4.53549	0.0491974
1224	ENSG00000213015	ZNF580	-2.52168	0.0373956
1225	ENSG00000213025	COX20P1	2.69717	0.0332271
1226	ENSG00000213030	CGB8	3.0079	0.0205209
1227	ENSG00000213082	PPP1R14BP2	-2.49439	0.039287
1228	ENSG00000213089	PDCL3P5	2.96985	0.024016
1229	ENSG00000213183	RPS7P8	2.91398	0.0489687
1230	ENSG00000213221	DNLZ	-2.91379	0.0404119
1231	ENSG00000213315	AL122020.1	2.88396	0.0271537
1232	ENSG00000213362	FTH1P12	-3.15842	0.0141481
1233	ENSG00000213445	SIPA1	-2.48621	0.0392572
1234	ENSG00000213448	RPS23P2	5.63748	0.015031
1235	ENSG00000213453	FTH1P3	-2.97568	0.0185666
1236	ENSG00000213478	CFL1P2	3.27517	0.0462888
1237	ENSG00000213551	DNAJC9	2.68294	0.0293119
1238	ENSG00000213563	C8orf82	-2.88225	0.0212713
1239	ENSG00000213650	AC092447.2	5.44297	0.0190761
1240	ENSG00000213889	PPM1N	2.81348	0.0386311
1241	ENSG00000213903	LTB4R	-2.65481	0.0310269
1242	ENSG00000213976	AC010615.1	3.58072	0.047927
1243	ENSG00000213979	RPL7AP14	3.86126	0.0350646
1244	ENSG00000214049	UCA1	2.64723	0.037324
1245	ENSG00000214050	FBXO16	2.40749	0.0479285
1246	ENSG00000214106	PAXIP1-AS2	2.91095	0.0321706
1247	ENSG00000214185	XPOTP1	-3.29953	0.0164838
1248	ENSG00000214226	C17orf67	-2.70465	0.0283657
1249	ENSG00000214273	AGGF1P1	-2.79395	0.0379732
1250	ENSG00000214366	EIF4EP5	3.75161	0.0262747
1251	ENSG00000214530	STARD10	-3.17823	0.0136455
1252	ENSG00000214544	GTF2IRD2P1	-3.16104	0.0143166
1253	ENSG00000214646	COMMD4P1	3.91476	0.0205601
1254	ENSG00000214708	AC116407.1	-4.79706	0.00113104
1255	ENSG00000214796	AC098934.1	5.91576	0.00169995
1256	ENSG00000214894	LINC00243	4.49187	0.0153184
1257	ENSG00000215007	DNAJA1P3	5.95391	0.0113411
1258	ENSG00000215156	AC138409.1	5.74925	0.0134909
1259	ENSG00000215190	LINC00680	2.98061	0.0211904
1260	ENSG00000215302	AC127502.1	-2.72836	0.027644
1261	ENSG00000215559	ANKRD20A11P	4.56265	0.0476934
1262	ENSG00000215845	TSTD1	2.74984	0.0271537
1263	ENSG00000215915	ATAD3C	-2.5416	0.0371849
1264	ENSG00000218014	KRT19P1	-2.6741	0.0371849
1265	ENSG00000218069	RSL24D1P1	4.91944	0.0337694
1266	ENSG00000218305	CDC14C	-3.62388	0.0147371
1267	ENSG00000218502	H2AZP3	2.9069	0.0283079
1268	ENSG00000219201	AC138392.1	2.52413	0.0477883
1269	ENSG00000219392	ZNF602P	5.21102	0.0248688
1270	ENSG00000219507	FTH1P8	-2.99861	0.017755
1271	ENSG00000219607	PPP1R3G	-2.45313	0.0446906
1272	ENSG00000220130	AL079342.1	2.70779	0.0395398
1273	ENSG00000220744	RPL5P18	5.04355	0.0294879
1274	ENSG00000220868	MRPL35P1	4.65763	0.0434834
1275	ENSG00000221164	SNORA11F	3.14845	0.0361131
1276	ENSG00000221539	SNORD99	4.62724	0.0446906
1277	ENSG00000221869	CEBPD	-3.70138	0.00674747
1278	ENSG00000221949	LINC01465	-3.06451	0.0170853
1279	ENSG00000221968	FADS3	-3.03436	0.0168059
1280	ENSG00000221978	CCNL2	-2.34122	0.0486713
1281	ENSG00000222724	RNU2-63P	4.8327	0.0367919
1282	ENSG00000223361	FTH1P10	-3.12922	0.014706
1283	ENSG00000223382	LINC01778	5.96983	0.0113411
1284	ENSG00000223478	AL441992.2	2.71956	0.0283657
1285	ENSG00000223485	LINC01615	2.4027	0.0480996
1286	ENSG00000223496	EXOSC6	-3.28691	0.0123047
1287	ENSG00000223509	AC135983.3	-2.78982	0.0254046
1288	ENSG00000223552	CCR5AS	3.85198	0.00709897
1289	ENSG00000223612	AC241585.1	-2.89682	0.0218183
1290	ENSG00000223723	BX842568.2	-3.45129	0.0200395
1291	ENSG00000223803	RPS20P14	2.51645	0.0473818
1292	ENSG00000223935	LGALSL-DT	-2.95339	0.0383805
1293	ENSG00000224004	ATP5F1CP1	2.82837	0.040073
1294	ENSG00000224016	AC092681.1	-4.21248	0.0106685
1295	ENSG00000224184	MIR3681HG	4.26391	0.00479589
1296	ENSG00000224531	SMIM13	-2.33981	0.0488543
1297	ENSG00000224848	AL589843.1	3.30295	0.0302346
1298	ENSG00000224877	NDUFAF8	-2.56291	0.0350646
1299	ENSG00000224897	POT1-AS1	3.26426	0.0323954
1300	ENSG00000224908	TIMM8BP2	2.74379	0.0373956
1301	ENSG00000224945	AL353150.1	-2.61222	0.0342069
1302	ENSG00000225177	AL590617.2	-2.89182	0.0212893
1303	ENSG00000225224	RPS27AP12	3.50564	0.022872
1304	ENSG00000225535	LINC01393	-3.10825	0.0276602
1305	ENSG00000225556	C2CD4D	-2.60883	0.0350646
1306	ENSG00000225643	AL606491.1	-2.46532	0.0496909
1307	ENSG00000225721	AL592166.1	4.57584	0.0471692
1308	ENSG00000225828	FAM229A	-2.94501	0.0248688
1309	ENSG00000225971	AC003071.1	3.47135	0.0361131
1310	ENSG00000225984	HMGB1P26	2.90059	0.0498809
1311	ENSG00000226174	TEX22	-2.94336	0.0303389
1312	ENSG00000226268	AC135977.1	-2.81741	0.024016
1313	ENSG00000226479	TMEM185B	-2.99601	0.0179066
1314	ENSG00000226532	AL022718.1	3.45282	0.0369386
1315	ENSG00000226564	FTH1P20	-3.11614	0.0147371
1316	ENSG00000226806	LCT-AS1	3.5685	0.0201103
1317	ENSG00000226963	AC078883.2	-3.12421	0.0156203
1318	ENSG00000227001	NBPF2P	-3.35535	0.0193897
1319	ENSG00000227014	AC007285.1	-2.43343	0.0488543
1320	ENSG00000227199	ST7-AS1	-3.82545	0.00635157
1321	ENSG00000227220	AL133346.1	-2.85427	0.0462888
1322	ENSG00000227234	SPANXB1	2.88166	0.0255218
1323	ENSG00000227339	THRAP3P1	5.73873	0.013742
1324	ENSG00000227375	DLG1-AS1	5.44682	0.018903
1325	ENSG00000227376	FTH1P16	-2.61463	0.0327939
1326	ENSG00000227496	AC099066.2	5.82021	0.0128652
1327	ENSG00000227507	LTB	-2.86427	0.0227822
1328	ENSG00000227586	RPS26P39	2.63993	0.0462602
1329	ENSG00000227590	ATP5MC1P5	4.57279	0.0473818
1330	ENSG00000227640	SOX21-AS1	-2.79736	0.0280626
1331	ENSG00000227694	RPL23AP74	2.72374	0.038646
1332	ENSG00000227706	AL713998.1	3.37188	0.0113411
1333	ENSG00000227855	DPY19L2P3	-2.49102	0.0402643
1334	ENSG00000227857	AL358075.2	3.23644	0.0480652
1335	ENSG00000227941	UQCRBP2	3.2476	0.0372916
1336	ENSG00000227959	AL451042.2	5.13957	0.0268512
1337	ENSG00000228158	TLE1P1	-2.65649	0.0347878
1338	ENSG00000228175	GEMIN8P4	7.35121	0.00113104
1339	ENSG00000228407	AL139156.2	-2.61376	0.0371849
1340	ENSG00000228594	FNDC10	-3.48167	0.00922168
1341	ENSG00000228929	RPS13P2	2.70419	0.0292096
1342	ENSG00000228986	AC234781.3	-3.54793	0.00977188
1343	ENSG00000229127	KANSL1L-AS1	5.15053	0.0264548
1344	ENSG00000229413	AC018638.1	-2.97285	0.0445116
1345	ENSG00000229422	AL512625.2	-2.93868	0.0388463
1346	ENSG00000229487	ALG13-AS1	-4.36249	0.00635157
1347	ENSG00000229587	AL158825.2	-2.64772	0.0394484
1348	ENSG00000229598	PRDX3P1	3.51625	0.0348673
1349	ENSG00000229604	MTATP8P2	5.59953	0.0157667
1350	ENSG00000229820	CR391992.1	-3.80865	0.00924488
1351	ENSG00000229833	PET100	2.42495	0.0433931
1352	ENSG00000229840	ISCA1P2	-2.93771	0.0425327
1353	ENSG00000229919	ELOCP3	5.646	0.0147994
1354	ENSG00000229956	ZRANB2-AS2	2.99808	0.0319275
1355	ENSG00000230204	FTH1P5	-3.02147	0.0170853
1356	ENSG00000230262	LINC02603	-3.20648	0.018564
1357	ENSG00000230626	AC011005.1	-2.76835	0.0263714
1358	ENSG00000230648	AL138831.1	3.41188	0.0386311
1359	ENSG00000230712	GGTLC4P	-3.99658	0.0128652
1360	ENSG00000230823	CBX1P1	4.60355	0.0461903
1361	ENSG00000230832	AC241584.1	4.09687	0.0265642
1362	ENSG00000231023	LINC00326	3.27701	0.0452397
1363	ENSG00000231057	AC096637.3	2.88719	0.0413275
1364	ENSG00000231120	BTF3P10	4.76258	0.011749
1365	ENSG00000231156	AC093702.1	-2.98963	0.0248622
1366	ENSG00000231177	LINC00852	4.61363	0.04523
1367	ENSG00000231259	AC125232.1	-2.39925	0.0447107
1368	ENSG00000231445	TIMM8AP1	3.36281	0.0411166
1369	ENSG00000231579	RPL7P21	2.56391	0.0361131
1370	ENSG00000231704	AC004895.1	-3.11281	0.0321466
1371	ENSG00000231769	AL035701.1	4.80825	0.0377123
1372	ENSG00000231770	TMEM44-AS1	3.43949	0.0114871
1373	ENSG00000231856	AL162377.1	-2.43298	0.0452977
1374	ENSG00000231871	IPO9-AS1	-3.00503	0.0302123
1375	ENSG00000231903	AC079354.2	5.1213	0.0271537
1376	ENSG00000231992	AC092802.4	-2.59955	0.0402117
1377	ENSG00000232187	FTH1P7	-3.22347	0.0128667
1378	ENSG00000232273	FTH1P1	-3.01989	0.0172468
1379	ENSG00000232295	AL589935.1	-3.35839	0.0271537
1380	ENSG00000232320	AC009299.2	-3.35872	0.0113411
1381	ENSG00000232393	RPL5P6	4.95217	0.0329202
1382	ENSG00000232431	AC055876.1	-2.7817	0.0464144
1383	ENSG00000232456	AL355994.2	-3.77987	0.0113531
1384	ENSG00000232485	AC098820.2	3.8071	0.0172755
1385	ENSG00000232648	AC107214.1	-2.41585	0.0461039
1386	ENSG00000232702	AL158050.1	-2.60606	0.0337675
1387	ENSG00000232774	AL355916.1	3.30469	0.0134901
1388	ENSG00000232949	AC002480.2	4.74813	0.0119644
1389	ENSG00000233155	HMGA1P8	-3.16807	0.0158974
1390	ENSG00000233287	AC009362.1	5.18182	0.0258293
1391	ENSG00000233337	UBE2FP3	4.81397	0.037324
1392	ENSG00000233493	TMEM238	-3.27633	0.0125364
1393	ENSG00000233654	AC108047.1	-2.41121	0.0482201
1394	ENSG00000233673	ANAPC1P1	-3.49464	0.0132787
1395	ENSG00000233695	GAS6-AS1	-2.96771	0.0446906
1396	ENSG00000233901	LINC01503	3.218	0.0166483
1397	ENSG00000233952	FTLP15	3.83259	0.0226388
1398	ENSG00000234062	AL390879.1	2.88089	0.0376644
1399	ENSG00000234323	LINC01505	2.86057	0.0386311
1400	ENSG00000234371	RPSAP31	4.76264	0.0391792
1401	ENSG00000234476	LINC02765	2.87079	0.0376644
1402	ENSG00000234513	AC073072.1	2.81489	0.0408441
1403	ENSG00000234520	AC018464.1	4.77672	0.0386311
1404	ENSG00000234869	AL021392.1	6.35745	0.00709897
1405	ENSG00000234917	AC098484.2	4.74107	0.0398398
1406	ENSG00000234975	FTH1P2	-3.17739	0.0136405
1407	ENSG00000235036	AL035456.1	2.52079	0.0396474
1408	ENSG00000235098	ANKRD65	-3.19084	0.0141481
1409	ENSG00000235105	AL356968.2	-2.53793	0.0368842
1410	ENSG00000235173	HGH1	-2.55938	0.0353404
1411	ENSG00000235272	RAMACL	2.58565	0.0350646
1412	ENSG00000235316	DUSP8P5	-3.19938	0.0173388
1413	ENSG00000235319	AC012360.1	-2.76292	0.028519
1414	ENSG00000235358	AC093151.2	-3.08514	0.0463932
1415	ENSG00000235486	AC114755.5	-3.27278	0.0473818
1416	ENSG00000235530	AC087294.1	5.52349	0.0172468
1417	ENSG00000235586	AC011247.1	-3.41991	0.0267726
1418	ENSG00000235916	AC233279.1	3.05863	0.0479285
1419	ENSG00000236058	RPL17P36	2.74107	0.029486
1420	ENSG00000236104	ZBTB22	-2.39264	0.0461021
1421	ENSG00000236137	AL445231.1	3.43806	0.0301868
1422	ENSG00000236166	AL021408.1	-3.92383	0.0162123
1423	ENSG00000236189	RPL18AP15	6.02546	0.0106685
1424	ENSG00000236242	MYO16-AS1	4.13206	0.0248688
1425	ENSG00000236360	AL445183.3	-2.46293	0.0481911
1426	ENSG00000236654	AC079780.1	-3.80301	0.0147994
1427	ENSG00000236761	CTAGE9	4.9094	0.0341383
1428	ENSG00000236778	INTS6-AS1	-2.75994	0.0271537
1429	ENSG00000236809	SNX25P1	-2.6435	0.0353553
1430	ENSG00000236824	BCYRN1	3.20808	0.0134909
1431	ENSG00000236871	LINC00106	-3.33534	0.0371849
1432	ENSG00000236872	PPIAP36	3.97792	0.018564
1433	ENSG00000236993	GAPDHP21	3.09019	0.0329202
1434	ENSG00000237077	AC105399.1	4.80398	0.0380135
1435	ENSG00000237154	MCFD2P1	5.18287	0.0256988
1436	ENSG00000237166	LINC01792	3.50432	0.0345947
1437	ENSG00000237172	B3GNT9	-2.62885	0.0331124
1438	ENSG00000237254	TRBV30	3.76853	0.0157667
1439	ENSG00000237264	FTH1P11	-3.19572	0.0132787
1440	ENSG00000237298	TTN-AS1	3.68659	0.0156006
1441	ENSG00000237350	CDC42P6	2.95855	0.0210486
1442	ENSG00000237436	CAMTA1-DT	-3.59187	0.0106988
1443	ENSG00000237514	PTP4A1P7	-3.33038	0.0255218
1444	ENSG00000237594	AP000251.1	-3.15033	0.0165664
1445	ENSG00000237666	AC097527.1	-3.20004	0.0207563
1446	ENSG00000237804	HNRNPA1P39	5.06668	0.0287074
1447	ENSG00000237813	AC002066.1	3.567	0.0128652
1448	ENSG00000237854	LINC00674	-3.10392	0.0148301
1449	ENSG00000237870	AC073130.1	3.87169	0.00641324
1450	ENSG00000237917	PARP4P1	4.99898	0.0310513
1451	ENSG00000237945	LINC00649	5.45341	0.0187898
1452	ENSG00000237976	AL391069.2	3.64824	0.0448705
1453	ENSG00000238021	ARMC4P1	3.07731	0.0409888
1454	ENSG00000238160	LINC02863	6.56121	0.00562842
1455	ENSG00000238227	TMEM250	-2.60117	0.0334166
1456	ENSG00000238754	SCARNA18B	4.61374	0.04523
1457	ENSG00000239264	TXNDC5	-3.42793	0.00984738
1458	ENSG00000239382	ALKBH6	-2.68888	0.0290296
1459	ENSG00000239473	RPL7P38	5.75855	0.0134909
1460	ENSG00000239521	CASTOR3	-3.25287	0.0128652
1461	ENSG00000239605	STPG4	3.51992	0.0345947
1462	ENSG00000239857	GET4	-2.6792	0.0294879
1463	ENSG00000240065	PSMB9	2.56463	0.0353619
1464	ENSG00000240108	NCOR1P1	-2.63323	0.0443178
1465	ENSG00000240476	LINC00973	2.6276	0.0341769
1466	ENSG00000240602	AADACP1	4.05111	0.0131887
1467	ENSG00000240747	KRBOX1	2.43926	0.0435603
1468	ENSG00000240857	RDH14	-2.82957	0.0235044
1469	ENSG00000241014	AC114490.1	-2.50955	0.0445116
1470	ENSG00000241058	NSUN6	2.42659	0.0446906
1471	ENSG00000241127	YAE1	2.4024	0.0451497
1472	ENSG00000241280	AC106712.2	3.75313	0.0156625
1473	ENSG00000241316	SUCLG2-AS1	2.66479	0.0342562
1474	ENSG00000241360	PDXP	-2.96968	0.0186525
1475	ENSG00000241666	AL031733.2	-2.48109	0.0404205
1476	ENSG00000242265	PEG10	2.54754	0.0388416
1477	ENSG00000242337	INHCAP	4.92971	0.0334662
1478	ENSG00000242474	AC093627.5	3.241	0.0219547
1479	ENSG00000242574	HLA-DMB	4.29111	0.00596459
1480	ENSG00000242667	AC087385.2	3.63055	0.0302109
1481	ENSG00000242697	RPL5P12	2.85916	0.0489081
1482	ENSG00000242915	SNRPGP7	5.41682	0.0196199
1483	ENSG00000242951	AC007182.2	5.9743	0.0113411
1484	ENSG00000242960	FTH1P23	-3.28339	0.0123084
1485	ENSG00000242992	FTH1P4	-2.72419	0.0276129
1486	ENSG00000243147	MRPL33	2.38292	0.0459236
1487	ENSG00000243243	AC073130.2	2.96388	0.0460818
1488	ENSG00000243406	MRPS31P5	3.54802	0.0329234
1489	ENSG00000243504	RPS23P1	5.67549	0.0147371
1490	ENSG00000243709	LEFTY1	-3.79869	0.00635157
1491	ENSG00000243797	AC004917.1	4.98243	0.0315646
1492	ENSG00000243960	AL390195.2	5.15174	0.0265642
1493	ENSG00000243978	RTL9	5.01665	0.0302123
1494	ENSG00000244045	TMEM199	2.52288	0.0396957
1495	ENSG00000244119	PDCL3P4	3.07954	0.0263418
1496	ENSG00000244198	ARHGEF35-AS1	-2.40136	0.0449264
1497	ENSG00000244256	RN7SL130P	4.91861	0.0337675
1498	ENSG00000244257	PKD1P1	-2.36522	0.0495923
1499	ENSG00000244486	SCARF2	-3.25766	0.0128652
1500	ENSG00000244604	AC025518.1	2.61939	0.0439388
1501	ENSG00000244621	RPS17P11	4.67701	0.0428644
1502	ENSG00000244682	FCGR2C	5.08813	0.0282287
1503	ENSG00000244722	RPSAP29	5.44935	0.0188753
1504	ENSG00000244952	AC123768.2	4.67392	0.0425798
1505	ENSG00000245213	AC105285.1	-2.43612	0.0463952
1506	ENSG00000245534	RORA-AS1	4.05507	0.0271537
1507	ENSG00000245648	AC022075.1	2.8232	0.0371099
1508	ENSG00000245694	CRNDE	-2.49462	0.0386311
1509	ENSG00000246090	AP002026.1	2.78638	0.0371849
1510	ENSG00000246596	AC139795.1	-2.56456	0.038155
1511	ENSG00000246982	Z84485.1	-2.4724	0.0494617
1512	ENSG00000247077	PGAM5	-2.59071	0.0337675
1513	ENSG00000248155	CR545473.1	-3.8505	0.0169122
1514	ENSG00000248240	AC114956.1	4.87054	0.035474
1515	ENSG00000248641	HMGA1P2	-3.34787	0.0131887
1516	ENSG00000248698	LINC01085	4.20433	0.0141803
1517	ENSG00000248795	AC098859.1	3.67541	0.0433285
1518	ENSG00000248923	MTND5P11	6.00649	0.0109007
1519	ENSG00000248966	BCLAF1P1	6.18289	0.00904261
1520	ENSG00000248988	AC093700.2	2.95213	0.033886
1521	ENSG00000249013	FTH1P21	-2.7868	0.0342083
1522	ENSG00000249272	UNC93B8	-3.45934	0.0128652
1523	ENSG00000249306	LINC01411	3.65533	0.0183955
1524	ENSG00000249307	LINC01088	2.51597	0.0401959
1525	ENSG00000249413	AC116049.2	2.98781	0.0362489
1526	ENSG00000249602	AL589765.4	-3.66924	0.0192682
1527	ENSG00000249741	AC093890.1	-3.17766	0.0143166
1528	ENSG00000249784	SCARNA22	3.04057	0.0258293
1529	ENSG00000249936	RAC1P2	-3.05419	0.0162123
1530	ENSG00000249992	TMEM158	-3.48709	0.00904261
1531	ENSG00000250072	SH3TC2-DT	2.63343	0.0404205
1532	ENSG00000250412	KLHL2P1	-2.57428	0.040729
1533	ENSG00000250548	LINC01303	2.56399	0.0425798
1534	ENSG00000250571	GLI4	-2.47295	0.0402856
1535	ENSG00000250699	AP000892.1	3.29952	0.0449684
1536	ENSG00000250853	RNF138P1	4.86598	0.0353619
1537	ENSG00000250892	AC108475.1	6.0177	0.0106685
1538	ENSG00000250938	AC073475.1	3.16236	0.0353404
1539	ENSG00000251169	LINC01843	2.77712	0.0396474
1540	ENSG00000251281	AC034223.2	3.11306	0.0256093
1541	ENSG00000251333	RTN3P1	-2.67522	0.0307362
1542	ENSG00000251442	LINC01094	4.42497	0.00865076
1543	ENSG00000251615	AC104825.1	3.37684	0.0402856
1544	ENSG00000251624	UNC93B7	-2.47626	0.0461021
1545	ENSG00000252128	AL158032.1	4.64398	0.0440646
1546	ENSG00000253173	H2AZP2	3.11055	0.0353553
1547	ENSG00000253251	SHLD3	2.8593	0.0265934
1548	ENSG00000253304	TMEM200B	-3.40477	0.0106685
1549	ENSG00000253305	PCDHGB6	-3.61672	0.0147994
1550	ENSG00000253320	AZIN1-AS1	-2.80402	0.0247133
1551	ENSG00000253368	TRNP1	-3.0293	0.0180217
1552	ENSG00000253374	AC023644.1	-2.62836	0.04237
1553	ENSG00000253414	AC124067.2	2.99713	0.0283327
1554	ENSG00000253512	AC008562.1	3.59206	0.0473818
1555	ENSG00000253522	MIR3142HG	3.5191	0.0131887
1556	ENSG00000253598	SLC10A5	4.7959	0.0380369
1557	ENSG00000253603	CERNA3	5.39562	0.0201076
1558	ENSG00000253669	GASAL1	2.7058	0.029931
1559	ENSG00000253710	ALG11	2.84671	0.0244952
1560	ENSG00000253802	SIRLNT	4.56332	0.00904261
1561	ENSG00000253944	AC027117.2	-4.66876	0.00212789
1562	ENSG00000253958	CLDN23	-2.35047	0.048336
1563	ENSG00000254602	AP000662.1	-3.20863	0.028213
1564	ENSG00000254634	SMG1P6	6.06849	0.00984738
1565	ENSG00000254639	AC116021.1	-3.08379	0.0170745
1566	ENSG00000254812	AC067930.2	-3.57643	0.040718
1567	ENSG00000254827	SLC22A18AS	5.21426	0.00113104
1568	ENSG00000254876	SUGT1P4-STRA6LP	5.57877	0.01604
1569	ENSG00000255074	AC018523.1	5.21753	0.0248036
1570	ENSG00000255185	PDXDC2P	3.74912	0.0393121
1571	ENSG00000255277	ABCC6P2	2.82643	0.0371849
1572	ENSG00000255874	LINC00346	3.19203	0.034672
1573	ENSG00000256001	AC079949.1	-2.89051	0.0435262
1574	ENSG00000256060	TRAPPC2B	2.39904	0.0451414
1575	ENSG00000256210	AC005255.1	2.94302	0.0279584
1576	ENSG00000256238	SUPT16HP1	3.39828	0.0265642
1577	ENSG00000256616	AP002414.2	-2.89362	0.0242463
1578	ENSG00000256751	PLBD1-AS1	-2.93268	0.0411915
1579	ENSG00000256951	AC055876.3	-3.92865	0.0168183
1580	ENSG00000257267	ZNF271P	2.41647	0.0443178
1581	ENSG00000257453	AC011611.3	-3.5563	0.0395398
1582	ENSG00000257497	AC121761.1	-3.01971	0.0186525
1583	ENSG00000257594	GALNT4	5.07453	0.0283657
1584	ENSG00000257704	INAFM1	-2.85587	0.0226337
1585	ENSG00000257718	CPNE8-AS1	3.27395	0.0459236
1586	ENSG00000257732	AC089983.1	2.61322	0.0447107
1587	ENSG00000258011	HMGA1P3	-3.03524	0.0210486
1588	ENSG00000258072	AC126177.6	-3.10359	0.0276129
1589	ENSG00000258088	AC078820.2	3.88126	0.0337675
1590	ENSG00000258102	MAP1LC3B2	-2.47137	0.03987
1591	ENSG00000258199	AC073896.4	3.97087	0.0302323
1592	ENSG00000258303	AC012464.2	5.45421	0.0186947
1593	ENSG00000258359	PCNPP1	-2.91998	0.0266527
1594	ENSG00000258397	BCAR1P1	-2.80488	0.0486713
1595	ENSG00000258401	AL512361.1	-2.66485	0.0420613
1596	ENSG00000258655	ARHGAP5-AS1	2.69584	0.0403809
1597	ENSG00000258738	AL121603.2	-2.5138	0.0407124
1598	ENSG00000258741	H2AZ2P1	-2.58392	0.0345918
1599	ENSG00000258771	BCAR1P2	-3.08839	0.0383805
1600	ENSG00000258884	LINC02321	3.03153	0.0419484
1601	ENSG00000258919	AL049836.1	-3.43396	0.0125602
1602	ENSG00000258920	FOXN3-AS1	-2.74464	0.0271537
1603	ENSG00000259032	ENSAP2	2.88607	0.0345918
1604	ENSG00000259051	HNRNPUP1	4.64949	0.0440161
1605	ENSG00000259065	AC005520.4	-2.88875	0.0219023
1606	ENSG00000259086	AL136298.3	2.73685	0.0311702
1607	ENSG00000259146	AC005476.2	2.59757	0.0407057
1608	ENSG00000259250	AC018904.1	5.3118	0.0219547
1609	ENSG00000259448	LINC02352	-2.79699	0.0290278
1610	ENSG00000259592	PRELID1P4	-3.17122	0.0194753
1611	ENSG00000259727	AC103740.2	6.26757	0.00859435
1612	ENSG00000259751	AC018868.2	3.06639	0.0411915
1613	ENSG00000259803	SLC22A31	-3.90691	0.00952919
1614	ENSG00000259863	SH3RF3-AS1	-2.47422	0.0437758
1615	ENSG00000259895	AC106820.2	-3.07358	0.0445116
1616	ENSG00000259924	AC011939.1	5.46183	0.0186525
1617	ENSG00000259974	LINC00261	-2.49412	0.0461903
1618	ENSG00000260001	TGFBR3L	-2.36301	0.0474703
1619	ENSG00000260088	DDX59-AS1	-2.63913	0.0411166
1620	ENSG00000260121	AC138028.4	-4.31702	0.00362202
1621	ENSG00000260253	AC084262.1	3.26314	0.0379897
1622	ENSG00000260257	AL035071.1	3.61966	0.0125223
1623	ENSG00000260273	AL359711.2	5.86786	0.0125364
1624	ENSG00000260405	AC109446.1	4.66741	0.0433285
1625	ENSG00000260500	AC010336.2	-3.09208	0.0404205
1626	ENSG00000260563	AC132872.1	-2.81452	0.0308206
1627	ENSG00000260641	AC114811.2	3.38869	0.0265934
1628	ENSG00000260651	AF213884.3	-3.42458	0.014286
1629	ENSG00000260793	AC003102.1	-2.82708	0.0482631
1630	ENSG00000260853	AC109460.2	-3.02853	0.0361131
1631	ENSG00000261040	WFDC21P	3.92586	0.0205601
1632	ENSG00000261150	EPPK1	-3.47335	0.0131219
1633	ENSG00000261243	AC022165.1	2.99633	0.0437758
1634	ENSG00000261335	AC005837.1	3.25871	0.046949
1635	ENSG00000261371	PECAM1	2.69806	0.0347329
1636	ENSG00000261431	AL023803.1	3.77249	0.0254483
1637	ENSG00000261455	LINC01003	-2.80517	0.0243946
1638	ENSG00000261468	AC096921.2	5.35931	0.0207563
1639	ENSG00000261490	AC005674.2	4.62315	0.0449241
1640	ENSG00000261614	YBX3P1	-2.83094	0.0265642
1641	ENSG00000261737	AL049597.2	-2.48934	0.0419075
1642	ENSG00000261798	AL033527.3	-3.63542	0.00926127
1643	ENSG00000261819	AC138932.4	-3.23138	0.0128667
1644	ENSG00000261886	AC005670.1	5.20125	0.0254046
1645	ENSG00000262402	MCUR1P1	-3.45673	0.0218183
1646	ENSG00000262412	AL160291.1	3.12081	0.0346579
1647	ENSG00000262481	TMEM256-PLSCR3	-3.0526	0.0240519
1648	ENSG00000263327	TAPT1-AS1	-2.76617	0.0286343
1649	ENSG00000263627	PPP4R1-AS1	-3.20734	0.0283657
1650	ENSG00000263823	AC009831.1	5.87931	0.0124704
1651	ENSG00000264229	RNU4ATAC	5.63717	0.0149451
1652	ENSG00000264268	MIR4767	-3.62636	0.0128652
1653	ENSG00000264278	ZNF236-DT	-2.46716	0.0423037
1654	ENSG00000264548	AC132872.2	-3.89347	0.0113411
1655	ENSG00000264964	AP001033.3	2.71823	0.0437519
1656	ENSG00000265630	BX547991.2	-3.4052	0.0173531
1657	ENSG00000265666	RARA-AS1	-2.99107	0.0186525
1658	ENSG00000265692	LINC01970	-2.8441	0.0353265
1659	ENSG00000265982	AC103810.3	-3.03586	0.0279584
1660	ENSG00000266010	GATA6-AS1	-2.52727	0.0451497
1661	ENSG00000266208	AC080112.2	-3.71019	0.00838524
1662	ENSG00000266265	KLF14	-3.93622	0.0097473
1663	ENSG00000266278	LINC01910	2.87793	0.0491467
1664	ENSG00000266931	AC092651.2	-3.52724	0.00940294
1665	ENSG00000267023	LRRC37A16P	-2.94697	0.0194753
1666	ENSG00000267058	AC006213.2	3.54737	0.0207563
1667	ENSG00000267185	PTP4A2P1	-2.82797	0.0246808
1668	ENSG00000267197	AC011461.1	-2.7663	0.0489081
1669	ENSG00000267500	ZNF887P	3.17886	0.0420613
1670	ENSG00000267533	AP002414.4	-3.30908	0.0205601
1671	ENSG00000267631	CGB1	2.49334	0.0451414
1672	ENSG00000267745	AC060766.7	4.54714	0.048372
1673	ENSG00000267751	AC009005.1	2.43593	0.0488086
1674	ENSG00000268583	AC011466.1	4.55991	0.0479786
1675	ENSG00000268592	AL355312.3	-3.56808	0.00904261
1676	ENSG00000269289	AC011503.1	4.65763	0.0434834
1677	ENSG00000269374	AC011497.2	-3.15569	0.0147371
1678	ENSG00000269388	AC018755.3	-3.31953	0.0126483
1679	ENSG00000269688	AC008982.2	-2.99536	0.0198802
1680	ENSG00000269696	AC005498.3	4.38009	0.00904261
1681	ENSG00000269706	AC008687.6	7.53709	0.00106444
1682	ENSG00000269904	MAP2K4P1	-2.5253	0.0435268
1683	ENSG00000269918	AF131215.6	3.62286	0.0460836
1684	ENSG00000270127	AC027020.2	5.51504	0.0173531
1685	ENSG00000270157	AC004918.5	-2.65384	0.0377129
1686	ENSG00000270419	CAHM	-3.42772	0.0116096
1687	ENSG00000270482	AC026367.1	-3.11524	0.0314462
1688	ENSG00000270659	AC079610.1	-3.05473	0.0248688
1689	ENSG00000270975	MAGOH3P	7.23649	0.00130335
1690	ENSG00000270996	AC005034.5	-3.19026	0.0143166
1691	ENSG00000271121	NUDT4P2	-3.31533	0.0117538
1692	ENSG00000271127	AP000526.1	3.14887	0.0292755
1693	ENSG00000271155	AL161729.1	-4.69927	0.00317717
1694	ENSG00000271266	LAPTM4BP2	-3.00537	0.0218183
1695	ENSG00000271303	SRXN1	-3.22017	0.0132037
1696	ENSG00000271334	LINC02104	3.26055	0.0218183
1697	ENSG00000271380	AL451085.3	-3.37295	0.0128652
1698	ENSG00000271550	BNIP3P11	5.01205	0.0305151
1699	ENSG00000271654	AC025062.2	-2.49197	0.048372
1700	ENSG00000271662	AC233280.2	-3.70822	0.0134909
1701	ENSG00000271707	ATP1B3P1	-2.5053	0.0481911
1702	ENSG00000271781	AC026740.1	5.57123	0.0163957
1703	ENSG00000271789	AL080317.1	5.40704	0.0197233
1704	ENSG00000271857	AL096865.1	-3.73827	0.00904261
1705	ENSG00000271888	AL136162.1	-2.46372	0.0480652
1706	ENSG00000271943	AC098614.3	-2.7972	0.0329234
1707	ENSG00000271966	AC021321.1	-2.90074	0.0228466
1708	ENSG00000271976	AC012467.2	2.90262	0.0495936
1709	ENSG00000271993	AC126118.1	5.42085	0.0193897
1710	ENSG00000272010	AC100814.2	5.02846	0.029931
1711	ENSG00000272077	AC124045.1	3.328	0.0427914
1712	ENSG00000272092	AC087623.2	-2.61993	0.0344389
1713	ENSG00000272097	AL024498.1	3.95496	0.0193897
1714	ENSG00000272142	AL359643.3	2.84937	0.0271537
1715	ENSG00000272282	LINC02084	3.0871	0.0292096
1716	ENSG00000272447	AL135925.1	-2.72667	0.0283079
1717	ENSG00000272543	MIR4787	-2.65402	0.0396957
1718	ENSG00000272663	AC093635.1	3.05103	0.0407212
1719	ENSG00000272667	AC012306.2	-2.75216	0.0270881
1720	ENSG00000272677	AC124016.2	-2.90749	0.0207563
1721	ENSG00000272767	JMJD1C-AS1	-2.85623	0.025668
1722	ENSG00000272768	AC004854.2	-2.70919	0.0337675
1723	ENSG00000272777	AC019131.2	4.01042	0.0175853
1724	ENSG00000272888	LINC01578	-2.96335	0.0188012
1725	ENSG00000272892	AL133551.1	3.31063	0.0347988
1726	ENSG00000272914	AL359532.1	5.57474	0.0162123
1727	ENSG00000272933	AL391121.1	-3.03039	0.0170853
1728	ENSG00000273038	AL365203.2	3.06186	0.0345918
1729	ENSG00000273066	AL355987.4	-2.66414	0.0344927
1730	ENSG00000273117	AC144652.1	-2.38462	0.0473818
1731	ENSG00000273139	AC007663.3	-3.09441	0.0447985
1732	ENSG00000273143	AL355512.1	2.88995	0.0237971
1733	ENSG00000273210	AP001437.1	-2.83727	0.0418228
1734	ENSG00000273218	AC005776.2	-3.00303	0.0345947
1735	ENSG00000273270	AC090114.2	-2.70349	0.0313559
1736	ENSG00000273289	AL121672.3	3.57189	0.0482304
1737	ENSG00000273306	AC018690.1	4.59702	0.0461903
1738	ENSG00000273345	AC104109.4	-3.07948	0.0172527
1739	ENSG00000273367	AL355472.3	4.72266	0.040729
1740	ENSG00000273415	LINC02725	2.67131	0.0448705
1741	ENSG00000273768	RNVU1-29	4.71241	0.0411229
1742	ENSG00000274012	RN7SL2	2.66922	0.0335417
1743	ENSG00000274070	CASTOR2	-2.44939	0.0451497
1744	ENSG00000274523	RCC1L	-2.42974	0.0425798
1745	ENSG00000274712	AC005332.4	-2.40345	0.0497258
1746	ENSG00000274791	F8A2	-2.97497	0.0186071
1747	ENSG00000274825	AL023803.2	5.04131	0.0295023
1748	ENSG00000274964	AC026356.1	5.24883	0.0238063
1749	ENSG00000274976	AC087588.2	4.818	0.0371849
1750	ENSG00000274997	H2AC12	3.33807	0.0279584
1751	ENSG00000275180	AC048341.2	-2.59982	0.0341769
1752	ENSG00000275183	LENG9	-2.94412	0.0314759
1753	ENSG00000275202	AL161421.1	-2.56397	0.0361076
1754	ENSG00000275405	AC213203.2	5.36106	0.0207563
1755	ENSG00000275494	AC133552.5	-2.43195	0.0442844
1756	ENSG00000275601	AC011330.2	4.57073	0.0473818
1757	ENSG00000275896	PRSS2	2.81527	0.0271537
1758	ENSG00000276248	AL442125.1	5.62362	0.0152916
1759	ENSG00000276386	CNTNAP3P2	-2.36684	0.0480652
1760	ENSG00000276390	AC004241.3	3.24582	0.0279584
1761	ENSG00000276410	H2BC3	6.45137	0.00635157
1762	ENSG00000276744	AC105137.2	4.9137	0.0339921
1763	ENSG00000276759	AL353753.1	5.70614	0.0143166
1764	ENSG00000276851	AC002401.4	5.68225	0.0146902
1765	ENSG00000276953	TRBV12-4	3.04097	0.048339
1766	ENSG00000277150	F8A3	-2.63423	0.0314462
1767	ENSG00000277156	AL589743.6	-2.48228	0.04237
1768	ENSG00000277203	F8A1	-2.59822	0.0334662
1769	ENSG00000277462	ZNF670	2.54398	0.0386311
1770	ENSG00000277672	AC011603.5	-2.964	0.0188012
1771	ENSG00000277791	PSMB3	2.60116	0.0333323
1772	ENSG00000277867	AC138649.4	-3.22415	0.0143166
1773	ENSG00000278048	AC024051.10	3.58892	0.0479786
1774	ENSG00000278156	TSC22D1-AS1	-2.63009	0.0435268
1775	ENSG00000278771	RN7SL3	2.49477	0.0493937
1776	ENSG00000278828	H3C10	3.59279	0.0125602
1777	ENSG00000278879	AP000560.1	4.82323	0.0371849
1778	ENSG00000278987	AL031009.1	4.83298	0.0368849
1779	ENSG00000279078	SND1-IT1	3.80072	0.0236605
1780	ENSG00000279217	Z95114.1	-3.77625	0.0226163
1781	ENSG00000279259	AC087741.3	-2.53633	0.0419484
1782	ENSG00000279331	RBM12B-AS1	5.68392	0.0146902
1783	ENSG00000279432	AC015799.1	4.76854	0.039096
1784	ENSG00000279461	AC005480.2	3.18091	0.0409888
1785	ENSG00000279561	AL845472.2	-2.6742	0.0361569
1786	ENSG00000279673	AC092919.3	3.26225	0.0464746
1787	ENSG00000279692	AC110285.6	-2.49136	0.0405475
1788	ENSG00000279766	AC067931.1	-3.43787	0.0125602
1789	ENSG00000279800	BCLAF1P2	2.62692	0.0332271
1790	ENSG00000279822	AC016397.2	5.48502	0.0181444
1791	ENSG00000279894	Z73965.1	4.81613	0.0372622
1792	ENSG00000279901	AC092117.2	-2.69957	0.0305151
1793	ENSG00000280010	AP001350.2	5.06981	0.0284055
1794	ENSG00000280046	AC104581.4	-2.80689	0.0446124
1795	ENSG00000280060	AL512506.2	4.77573	0.0386311
1796	ENSG00000280079	AC011447.7	2.9188	0.0302323
1797	ENSG00000280120	AC073857.1	2.69591	0.0444987
1798	ENSG00000280128	AL662795.2	2.43957	0.0488723
1799	ENSG00000280852	AC025048.6	-3.18755	0.0134909
1800	ENSG00000281332	LINC00997	4.74767	0.0396961
1801	ENSG00000281903	LINC02246	-2.63064	0.047848
1802	ENSG00000282051	AC010507.1	-3.24317	0.0204341
1803	ENSG00000282386	AL358472.4	4.45114	0.0106685
1804	ENSG00000283154	IQCJ-SCHIP1	-2.50952	0.0386311
1805	ENSG00000283390	AC068631.4	2.78475	0.0263305
1806	ENSG00000283453	AC244258.1	3.31195	0.0435603
1807	ENSG00000283541	BX005040.4	-2.75204	0.0335628
1808	ENSG00000283839	AC096667.1	-2.61443	0.0371849
1809	ENSG00000284128	AP000356.3	5.98656	0.0111711
