# Supplementary material for: Analysis of the effects of aryl hydrocarbon receptor expression on cancer cell invasionviathree-dimensional microfluidic invasion assays
Source: Royal Society of Chemistry journal article supplement (doi:10.1039/d1lc00854d), 2021-12-14
Supplement: d1lc00854d4.xlsx [file d1lc00854d4.xlsx]

## Sheet: Sheet1
Groups	Go Term	GO ID	Ontology Source	# Genes	% Associated Genes	Term p-value	Associated Genes
1	Retinoblastoma Gene in Cancer	WP:2446	WikiPathways_08.05.2020	18	20.4545	0.0072801	[CCND3, CCNE1, CCNE2, E2F1, FAF1, H2AZ1, KIF4A, PCNA, PLK4, POLA1, POLD3, POLE2, RABIF, RFC4, SAP30, SMC2, SMC3, TOP2A]
2	Activation of Matrix Metalloproteinases	R-HSA:1592389	REACTOME_Pathways_08.05.2020	10	30.303	0.0281222	[COL18A1, CTSK, CTSV, FURIN, MMP1, MMP11, MMP17, MMP3, PRSS2, TIMP2]
3	Cell Cycle	R-HSA:1640170	REACTOME_Pathways_08.05.2020	78	11.5899	3.76633e-05	[AKT1, BRCA1, BRCA2, BRCC3, CCND3, CCNE1, CCNE2, CDC27, CDKN1C, CENPE, CENPF, CENPH, CENPI, CENPK, CENPM, CENPO, CENPQ, CENPW, CHTF8, CLSPN, DYNLL1, E2F1, E2F5, ESCO2, FEN1, FKBPL, GMNN, H2AC6, H2AZ1, H2BC11, H2BC3, H2BC4, H3C10, H4-16, H4C3, KNL1, LEMD2, MCM10, MYBL2, NCAPG, NCAPH, NEK6, NSL1, PCNA, PHLDA1, PLK4, POLA1, POLD3, POLE2, PPP2R2D, PPP2R3B, PSMA2, PSMB3, PSMB4, PSMB6, PSMB7, PSMB9, PS…
3	Cell Cycle, Mitotic	R-HSA:69278	REACTOME_Pathways_08.05.2020	67	11.9643	0.000116405	[AKT1, CCND3, CCNE1, CCNE2, CDC27, CDKN1C, CENPE, CENPF, CENPH, CENPI, CENPK, CENPM, CENPO, CENPQ, DYNLL1, E2F1, E2F5, ESCO2, FEN1, FKBPL, GMNN, H2AC6, H2AZ1, H2BC11, H2BC3, H2BC4, H3C10, H4-16, H4C3, KNL1, LEMD2, MCM10, MYBL2, NCAPG, NCAPH, NEK6, NSL1, PCNA, PHLDA1, PLK4, POLA1, POLD3, POLE2, PPP2R2D, PPP2R3B, PSMA2, PSMB3, PSMB4, PSMB6, PSMB7, PSMB9, PSMD7, PSME2, PTTG1, RBX1, RFC1, RFC4, RPA4,…
3	Cell Cycle Checkpoints	R-HSA:69620	REACTOME_Pathways_08.05.2020	38	12.9693	0.0160517	[BRCA1, BRCC3, CCNE1, CCNE2, CDC27, CENPE, CENPF, CENPH, CENPI, CENPK, CENPM, CENPO, CENPQ, CLSPN, DYNLL1, H2BC11, H2BC3, H2BC4, H4-16, H4C3, KNL1, MCM10, NSL1, PSMA2, PSMB3, PSMB4, PSMB6, PSMB7, PSMB9, PSMD7, PSME2, RFC4, RMI2, SGO1, SGO2, SKA2, SPC25, ZWINT]
3	Mitotic G1 phase and G1/S transition	R-HSA:453279	REACTOME_Pathways_08.05.2020	25	16.7785	0.00508431	[AKT1, CCND3, CCNE1, CCNE2, CDKN1C, E2F1, E2F5, GMNN, MCM10, MYBL2, PCNA, POLA1, POLE2, PPP2R3B, PSMA2, PSMB3, PSMB4, PSMB6, PSMB7, PSMB9, PSMD7, PSME2, RPA4, TK1, TOP2A]
3	Chromosome Maintenance	R-HSA:73886	REACTOME_Pathways_08.05.2020	24	20.339	0.00021052	[CENPH, CENPI, CENPK, CENPM, CENPO, CENPQ, CENPW, CHTF8, FEN1, H2AC6, H2AZ1, H2BC11, H2BC3, H2BC4, H4-16, H4C3, KNL1, PCNA, POLA1, POLD3, RFC1, RFC4, TERF2IP, WRAP53]
3	New CENPA-containing nucleosomes are deposited at the centromere	R-HSA:606289	REACTOME_Reactions_08.05.2020	15	20.8333	0.0361098	[CENPH, CENPI, CENPK, CENPM, CENPO, CENPQ, CENPW, H2AC6, H2AZ1, H2BC11, H2BC3, H2BC4, H4-16, H4C3, KNL1]
3	centromere complex assembly	GO:0034508	GO_BiologicalProcess-EBI-UniProt-GOA-ACAP-ARAP_08.05.2020_00h00	14	23.3333	0.0173533	[CENPE, CENPF, CENPH, CENPI, CENPK, CENPM, CENPO, CENPQ, CENPV, CENPW, H4-16, H4C3, KNL1, NASP]
3	Mis18 complex binds the centromere	R-HSA:606349	REACTOME_Reactions_08.05.2020	8	38.0952	0.0307414	[CENPH, CENPI, CENPK, CENPM, CENPO, CENPQ, CENPW, KNL1]
3	DNA Replication	R-HSA:69306	REACTOME_Pathways_08.05.2020	23	18.1102	0.00329246	[CCNE1, CCNE2, CDC27, E2F1, FEN1, GMNN, MCM10, PCNA, POLA1, POLD3, POLE2, PSMA2, PSMB3, PSMB4, PSMB6, PSMB7, PSMB9, PSMD7, PSME2, RBX1, RFC1, RFC4, RPA4]
