# Supplementary material for: Analysis of the effects of aryl hydrocarbon receptor expression on cancer cell invasionviathree-dimensional microfluidic invasion assays
Source: Royal Society of Chemistry journal article supplement (doi:10.1039/d1lc00854d), 2021-12-14
Supplement: d1lc00854d5.xlsx [file d1lc00854d5.xlsx]

## Sheet: Sheet1
Groups	Go Term	GO ID	Ontology Source	# Genes	% Associated Genes	Term p-value	Associated Genes
1	NGF-stimulated transcription	R-HSA:9031628	REACTOME_Pathways_08.05.2020	11	28.2051	1.2018e-05	[CDK5R2, FOSL1, ID1, ID2, ID4, JUNB, JUND, LYL1, MEF2D, RRAD, VGF]
2	regulation of developmental process	GO:0050793	GO_BiologicalProcess-EBI-UniProt-GOA-ACAP-ARAP_08.05.2020_00h00	220	7.83755	1.79549e-05	[ACAP3, ADGRB3, ADM, AGR2, AKT1, AMH, ANKRD1, APCDD1, APOE, ARF6, ARNTL, ATAD5, ATOH8, ATP10A, BAMBI, BASP1, BMP1, BRCA1, BRCA2, BTG1, C3AR1, CARM1, CBFA2T2, CCDC3, CCDC85B, CCN2, CCN3, CCR3, CDC42, CDC42EP5, CDH4, CDK12, CEBPB, CEBPD, CELF4, CENPF, CHADL, CHN1, CITED2, CORO1A, CPNE5, CREB3L1, CRTAM, CSF1, CSF2, CSPG5, CST3, CTNNBIP1, CTSK, CTSV, CXCL10, DAAM1, DEAF1, DLL1, DPYSL3, DYNLL1, E2F1, …
3	molecular function regulator	GO:0098772	GO_BiologicalProcess-EBI-UniProt-GOA-ACAP-ARAP_08.05.2020_00h00	170	8.51703	1.75239e-06	[ACAP3, ADGRB3, ADM, AGFG1, AKR1B10, AKT1, AMH, ANOS1, ANP32E, APLN, APOC1, APOE, ARHGAP27, ARHGEF10L, ASAP2, BMP1, BOD1L1, BRCC3, BST2, C1QTNF1, CAB39L, CAMK2N2, CARD16, CASP1, CASP8AP2, CCL20, CCL26, CCN2, CCN3, CCND3, CCNE1, CCNE2, CCNI2, CCNK, CCNL2, CDK5R2, CDKN1C, CGB1, CHN1, CLEC11A, CMTM3, CMTM8, CPNE2, CSF1, CSF2, CSPG5, CST1, CST3, CST4, CST6, CTF1, CXCL10, CXCL11, CXCL2, DAD1, DGKI, DN…
3	receptor ligand activity	GO:0048018	GO_BiologicalProcess-EBI-UniProt-GOA-ACAP-ARAP_08.05.2020_00h00	57	10.7143	2.49138e-05	[ADM, AMH, APLN, BMP1, C1QTNF1, CCL20, CCL26, CCN2, CCN3, CGB1, CLEC11A, CMTM3, CMTM8, CSF1, CSF2, CSPG5, CTF1, CXCL10, CXCL11, CXCL2, ERFE, FGF1, FNDC5, GAS6, GDF15, GNAI2, GPNMB, IL18, JAG2, LEFTY1, LEFTY2, LTB, METRN, NENF, NRG1, NRG2, NRTN, PGF, PTN, PTRH2, PYY, SAA1, SAA2, SEMA3B, SEMA3F, TAFA3, TGFB1, TNFSF10, TNFSF9, TYMP, UCN, UCN2, VGF, WNT10A, WNT11, WNT7B, WNT8B]
4	Wnt signaling pathway	GO:0016055	GO_BiologicalProcess-EBI-UniProt-GOA-ACAP-ARAP_08.05.2020_00h00	59	10.7861	1.39063e-05	[AMFR, APCDD1, APOE, ARL6, ARNTL, ATP6V1C2, BAMBI, CCNE1, CDC42, CPE, CSNK1G2, CTNNBIP1, DAAM1, FOLR1, FRAT2, GNB1, GRB10, GRK6, HIC1, IGFBP1, IGFBP2, IGFBP4, KREMEN2, LGR5, LRP5, LZTS2, MARK2, MDFIC, NRARP, NXN, OTULIN, PPM1N, PSMA2, PSMB3, PSMB4, PSMB6, PSMB7, PSMB9, PSMD7, PSME2, PTPRU, RAC1, RBX1, RNF220, ROR1, RSPO3, RYK, SDC1, SIX3, SPNS1, STK11, TGFB1, TLE1, TLE5, WNT10A, WNT11, WNT7B, WNT…
4	cell-cell signaling by wnt	GO:0198738	GO_BiologicalProcess-EBI-UniProt-GOA-ACAP-ARAP_08.05.2020_00h00	59	10.7468	1.44949e-05	[AMFR, APCDD1, APOE, ARL6, ARNTL, ATP6V1C2, BAMBI, CCNE1, CDC42, CPE, CSNK1G2, CTNNBIP1, DAAM1, FOLR1, FRAT2, GNB1, GRB10, GRK6, HIC1, IGFBP1, IGFBP2, IGFBP4, KREMEN2, LGR5, LRP5, LZTS2, MARK2, MDFIC, NRARP, NXN, OTULIN, PPM1N, PSMA2, PSMB3, PSMB4, PSMB6, PSMB7, PSMB9, PSMD7, PSME2, PTPRU, RAC1, RBX1, RNF220, ROR1, RSPO3, RYK, SDC1, SIX3, SPNS1, STK11, TGFB1, TLE1, TLE5, WNT10A, WNT11, WNT7B, WNT…
5	macromolecule modification	GO:0043412	GO_BiologicalProcess-EBI-UniProt-GOA-ACAP-ARAP_08.05.2020_00h00	342	7.43155	5.22908e-06	[AATK, ABHD12, ABHD17C, ADCK2, AFP, AGA, AKT1, ALB, ALG11, ALG2, ALKBH8, AMFR, AMH, ANGPT1, ANKRD16, ANKRD9, APOBEC3A, APOBEC3B, APOE, ARNTL, ATP13A2, ATPSCKMT, AVPR2, B3GALT6, B3GNT9, B4GALT2, BCDIN3D, BOD1L1, BRAP, BRCA1, BRCA2, BRCC3, BTBD1, BTBD6, C1QTNF1, CAB39L, CAMK2N2, CARD16, CARD9, CARM1, CCL20, CCL26, CCN2, CCND3, CCNE1, CCNE2, CCNI2, CCNK, CCNL2, CDC14C, CDC27, CDC34, CDC42, CDC42BPB,…
5	cellular macromolecule metabolic process	GO:0044260	GO_BiologicalProcess-EBI-UniProt-GOA-ACAP-ARAP_08.05.2020_00h00	611	7.13702	5.88943e-09	[AATK, ABCF1, ABHD12, ABHD17C, ADCK2, ADM, AFP, AGA, AKT1, ALB, ALG11, ALG2, ALKBH8, ALYREF, AMFR, AMH, ANGPT1, ANKRD1, ANKRD9, ANOS1, APLN, APOBEC3A, APOBEC3B, APOE, ARHGEF10L, ARNTL, ATAD5, ATOH8, ATP13A2, ATPSCKMT, AVPR2, B3GALT6, B3GNT9, B4GALT2, BAMBI, BASP1, BCDIN3D, BCL3, BCL7A, BCLAF1, BCLAF3, BOD1L1, BRAP, BRCA1, BRCA2, BRCC3, BST2, BTBD1, BTBD6, BTG1, C1QTNF1, CAB39L, CALY, CAMK2N2, CAR…
5	cellular protein metabolic process	GO:0044267	GO_BiologicalProcess-EBI-UniProt-GOA-ACAP-ARAP_08.05.2020_00h00	394	7.20424	1.50127e-05	[AATK, ABCF1, ABHD12, ABHD17C, ADCK2, AFP, AGA, AKT1, ALB, ALG11, ALG2, AMFR, AMH, ANGPT1, ANKRD9, ANOS1, APOE, ARNTL, ATP13A2, ATPSCKMT, AVPR2, B3GALT6, B3GNT9, B4GALT2, BCL3, BOD1L1, BRAP, BRCA1, BRCA2, BRCC3, BST2, BTBD1, BTBD6, C1QTNF1, CAB39L, CAMK2N2, CARD16, CARD9, CARM1, CASP1, CASP8AP2, CCL20, CCL26, CCN2, CCND3, CCNE1, CCNE2, CCNI2, CCNK, CCNL2, CDC14C, CDC27, CDC34, CDC42, CDC42BPB, CD…
6	Regulation of Insulin-like Growth Factor (IGF) transport and uptake by Insulin-like Growth Factor Binding Proteins (IGFBPs)	R-HSA:381426	REACTOME_Pathways_08.05.2020	21	16.8	1.6115e-05	[AFP, ALB, APOE, CP, CSF1, CST3, FSTL3, GAS6, IGFBP1, IGFBP2, IGFBP3, IGFBP4, IGFBP7, MFGE8, MMP1, MXRA8, PNPLA2, TMEM132A, VCAN, VGF, VWA1]
6	FAM20C phosphorylates FAM20C substrates	R-HSA:8952289	REACTOME_Reactions_08.05.2020	19	17.5926	2.06431e-05	[AFP, ALB, APOE, CP, CSF1, CST3, FSTL3, GAS6, IGFBP1, IGFBP3, IGFBP4, IGFBP7, MFGE8, MXRA8, PNPLA2, TMEM132A, VCAN, VGF, VWA1]
6	Post-translational protein phosphorylation	R-HSA:8957275	REACTOME_Pathways_08.05.2020	19	17.5926	2.06431e-05	[AFP, ALB, APOE, CP, CSF1, CST3, FSTL3, GAS6, IGFBP1, IGFBP3, IGFBP4, IGFBP7, MFGE8, MXRA8, PNPLA2, TMEM132A, VCAN, VGF, VWA1]
7	negative regulation of signaling	GO:0023057	GO_BiologicalProcess-EBI-UniProt-GOA-ACAP-ARAP_08.05.2020_00h00	131	8.62978	1.82063e-05	[ADM, AKT1, AMFR, AMH, ANGPT1, APCDD1, APLN, APOE, ARNTL, ATAD5, BAMBI, BCL2L2, BCL3, BRAP, BRCA1, CARD16, CASTOR2, CASTOR3, CBFA2T2, CCDC3, CCN3, CDC34, CDC42, CELF4, CHST11, CREB3L1, CSF2, CTNNBIP1, DGKI, DLL1, DUSP1, DUSP2, DUSP8, DYNLL1, EID2, EMILIN1, ENY2, FADD, FAIM, FAM89B, FIGNL1, FST, FSTL3, FYN, GAS6, GDF15, GNAI2, GPNMB, GPRASP1, GRB10, GRK2, H2BC11, HIC1, HOMER3, HTRA1, HTRA3, IGFBP1…
7	negative regulation of cell communication	GO:0010648	GO_BiologicalProcess-EBI-UniProt-GOA-ACAP-ARAP_08.05.2020_00h00	131	8.64686	1.76819e-05	[ADM, AKT1, AMFR, AMH, ANGPT1, APCDD1, APLN, APOE, ARNTL, ATAD5, BAMBI, BCL2L2, BCL3, BRAP, BRCA1, CARD16, CASTOR2, CASTOR3, CBFA2T2, CCDC3, CCN3, CDC34, CDC42, CELF4, CHST11, CREB3L1, CSF2, CTNNBIP1, DGKI, DLL1, DUSP1, DUSP2, DUSP8, DYNLL1, EID2, EMILIN1, ENY2, FADD, FAIM, FAM89B, FIGNL1, FST, FSTL3, FYN, GAS6, GDF15, GNAI2, GPNMB, GPRASP1, GRB10, GRK2, H2BC11, HIC1, HOMER3, HTRA1, HTRA3, IGFBP1…
7	negative regulation of cellular process	GO:0048523	GO_BiologicalProcess-EBI-UniProt-GOA-ACAP-ARAP_08.05.2020_00h00	384	7.42316	8.77317e-07	[ABHD17C, ADM, AGR2, AKT1, ALB, AMFR, AMH, ANGPT1, ANKRD1, ANOS1, APCDD1, APLN, APOBEC3A, APOBEC3B, APOC1, APOE, ARF6, ARNTL, ATAD3A, ATAD5, ATOH8, ATP13A2, AVEN, AVPR2, BAMBI, BASP1, BCDIN3D, BCL2L2, BCL3, BCL7A, BCLAF1, BOD1L1, BRAP, BRCA1, BRCA2, BRCC3, BST2, BTG1, C1QTNF1, CAB39L, CAMK2N2, CAMSAP3, CARD16, CARM1, CASP8AP2, CASTOR2, CASTOR3, CBARP, CBFA2T2, CCAR1, CCDC3, CCDC85B, CCN2, CCN3, C…
7	negative regulation of response to stimulus	GO:0048585	GO_BiologicalProcess-EBI-UniProt-GOA-ACAP-ARAP_08.05.2020_00h00	148	8.45231	1.48281e-05	[ADM, AKT1, AMFR, AMH, ANGPT1, APCDD1, APLN, APOE, ARNTL, ATAD5, BAMBI, BCL2L2, BCL3, BRAP, BRCA1, BST2, C1QTNF1, C4BPB, CARD16, CASTOR2, CASTOR3, CBFA2T2, CCDC3, CCN3, CDC34, CDC42, CELF4, CHST11, CREB3L1, CSF2, CTNNBIP1, DLL1, DUSP1, DUSP2, DUSP8, DYNLL1, EID2, EMILIN1, ENY2, EPHA4, EPPK1, ERCC4, FADD, FAIM, FAM89B, FANCB, FBH1, FIGNL1, FNDC4, FOXA2, FST, FSTL3, FYN, GAS6, GDF15, GNAI2, GPR17, …
7	negative regulation of cellular metabolic process	GO:0031324	GO_BiologicalProcess-EBI-UniProt-GOA-ACAP-ARAP_08.05.2020_00h00	219	7.83542	2.09393e-05	[AKT1, AMH, ANGPT1, ANKRD1, ANOS1, APOC1, APOE, ARNTL, ATOH8, ATP13A2, BASP1, BCDIN3D, BCL3, BCL7A, BCLAF1, BOD1L1, BRCA1, BRCA2, BST2, CAMK2N2, CAMSAP3, CARD16, CASP8AP2, CBFA2T2, CCAR1, CCDC85B, CCND3, CCNE1, CDA, CDKN1C, CEBPB, CEBPD, CELF4, CENPF, CENPV, CITED2, CREB3L1, CREG1, CRTAP, CRYM, CSF2, CST1, CST3, CST4, CST6, CTBP1, CTDSPL, CTNNBIP1, DBI, DEAF1, DNAJC1, DUSP1, DUSP2, DUSP8, DYNLL1,…
7	negative regulation of biological process	GO:0048519	GO_BiologicalProcess-EBI-UniProt-GOA-ACAP-ARAP_08.05.2020_00h00	420	7.30308	1.22294e-06	[ABHD17C, ADGRB3, ADM, AGR2, AKT1, ALB, AMFR, AMH, ANGPT1, ANKRD1, ANOS1, APCDD1, APLN, APOBEC3A, APOBEC3B, APOC1, APOE, ARF6, ARNTL, ATAD3A, ATAD5, ATOH8, ATP13A2, AVEN, AVPR2, BAMBI, BASP1, BCDIN3D, BCL2L2, BCL3, BCL7A, BCLAF1, BOD1L1, BRAP, BRCA1, BRCA2, BRCC3, BST2, BTG1, C1QTNF1, C4BPB, CAB39L, CAMK2N2, CAMSAP3, CARD16, CARM1, CASP8AP2, CASTOR2, CASTOR3, CBARP, CBFA2T2, CCAR1, CCDC3, CCDC85B…
7	negative regulation of nitrogen compound metabolic process	GO:0051172	GO_BiologicalProcess-EBI-UniProt-GOA-ACAP-ARAP_08.05.2020_00h00	208	8.106	3.53506e-06	[AKT1, AMH, ANGPT1, ANKRD1, ANOS1, APOC1, APOE, ARNTL, ATOH8, ATP13A2, BASP1, BCDIN3D, BCL3, BCL7A, BCLAF1, BOD1L1, BRCA1, BST2, CAMK2N2, CARD16, CASP8AP2, CBFA2T2, CCAR1, CCDC85B, CCND3, CCNE1, CDA, CDKN1C, CEBPB, CEBPD, CELF4, CENPF, CENPV, CITED2, CREB3L1, CREG1, CRTAP, CRYM, CSF2, CST1, CST3, CST4, CST6, CTBP1, CTDSPL, CTNNBIP1, DBI, DEAF1, DNAJC1, DUSP1, DUSP2, DUSP8, E2F1, E2F5, EDNRB, EID2…
8	transforming growth factor beta receptor signaling pathway	GO:0007179	GO_BiologicalProcess-EBI-UniProt-GOA-ACAP-ARAP_08.05.2020_00h00	29	14.5729	1.24121e-05	[BAMBI, CDKN1C, CHST11, CITED2, EID2, EMILIN1, FAM89B, FOLR1, FURIN, GDF15, GIPC1, HTRA1, HTRA3, ID1, ITGB5, LEFTY1, LEFTY2, LOX, LTBP3, LTBP4, PEG10, SMAD6, SPRY2, STK11, STUB1, TGFB1, TGFBR3L, VASN, WFIKKN1]
8	regulation of transforming growth factor beta receptor signaling pathway	GO:0017015	GO_BiologicalProcess-EBI-UniProt-GOA-ACAP-ARAP_08.05.2020_00h00	22	17.3228	6.1361e-06	[BAMBI, CDKN1C, CHST11, CITED2, EID2, EMILIN1, FAM89B, FOLR1, GIPC1, HTRA1, HTRA3, LOX, LTBP4, PEG10, SMAD6, SPRY2, STK11, STUB1, TGFB1, TGFBR3L, VASN, WFIKKN1]
8	response to transforming growth factor beta	GO:0071559	GO_BiologicalProcess-EBI-UniProt-GOA-ACAP-ARAP_08.05.2020_00h00	34	13.2812	1.32007e-05	[ANKRD1, BAMBI, CDKN1C, CHST11, CITED2, EID2, EMILIN1, FAM89B, FNDC4, FOLR1, FURIN, FYN, GDF15, GIPC1, HTRA1, HTRA3, ID1, ITGB5, LEFTY1, LEFTY2, LOX, LTBP3, LTBP4, PEG10, SMAD6, SPRY2, STK11, STUB1, TGFB1, TGFBR3L, VASN, WFIKKN1, WNT10A, ZFP36L2]
8	cellular response to transforming growth factor beta stimulus	GO:0071560	GO_BiologicalProcess-EBI-UniProt-GOA-ACAP-ARAP_08.05.2020_00h00	33	13.2	1.9882e-05	[ANKRD1, BAMBI, CDKN1C, CHST11, CITED2, EID2, EMILIN1, FAM89B, FOLR1, FURIN, FYN, GDF15, GIPC1, HTRA1, HTRA3, ID1, ITGB5, LEFTY1, LEFTY2, LOX, LTBP3, LTBP4, PEG10, SMAD6, SPRY2, STK11, STUB1, TGFB1, TGFBR3L, VASN, WFIKKN1, WNT10A, ZFP36L2]
8	regulation of cellular response to transforming growth factor beta stimulus	GO:1903844	GO_BiologicalProcess-EBI-UniProt-GOA-ACAP-ARAP_08.05.2020_00h00	22	17.0543	7.96543e-06	[BAMBI, CDKN1C, CHST11, CITED2, EID2, EMILIN1, FAM89B, FOLR1, GIPC1, HTRA1, HTRA3, LOX, LTBP4, PEG10, SMAD6, SPRY2, STK11, STUB1, TGFB1, TGFBR3L, VASN, WFIKKN1]
