# Supplementary material for: Analysis of the effects of aryl hydrocarbon receptor expression on cancer cell invasionviathree-dimensional microfluidic invasion assays
Source: Royal Society of Chemistry journal article supplement (doi:10.1039/d1lc00854d), 2021-12-14
Supplement: d1lc00854d6.xlsx [file d1lc00854d6.xlsx]

## Sheet: Fig4D_input_i_Clusters_paths_fr
KEGG Pathway ID	Term Description	Group	WT 1	WT 2	WT 3	WT 4	WT 5	AHRko 1	AHRko 2	AHRko 3	AHRko 4	AHRko 5
hsa03050	Proteasome	1	-1.05169	-1.0288	-1.02093	0.0902615	-1.0999	0.688503	0.646175	0.614837	1.28806	0.873499
hsa05012	Parkinson disease	1	-0.593159	-0.532605	-0.0521757	-0.0765595	-0.571816	0.357117	0.276196	0.206913	0.601877	0.38421
hsa05017	Spinocerebellar ataxia	1	-0.332138	-0.570591	0.164947	-0.131451	-0.692249	0.280678	0.132929	0.238033	0.532932	0.37691
hsa05020	Prion disease	1	-0.533786	-0.529058	0.101451	-0.11736	-0.537456	0.265251	0.200478	0.145958	0.526964	0.477557
hsa04110	Cell cycle	2	-0.486343	-0.297881	0.613953	-0.315333	-0.256737	0.0699506	-0.0319385	0.217748	0.236724	0.249856
hsa04114	Oocyte meiosis	2	-0.777989	-0.70449	-0.0898174	-0.133732	-0.75542	0.430152	0.154012	0.575716	0.646902	0.654667
hsa04115	p53 signaling pathway	2	-0.548823	0.353142	1.61911	-0.644172	0.131674	-0.391449	-0.322198	-0.0157055	-0.191564	0.00998799
hsa04218	Cellular senescence	2	0.089098	0.063875	1.72265	-0.56863	0.127333	-0.36681	-0.341116	-0.278725	-0.319825	-0.127845
hsa05161	Hepatitis B	2	0.146453	-0.0411867	1.43069	-0.589523	0.126991	-0.322392	-0.195331	-0.175097	-0.310752	-0.0698502
hsa05166	Human T-cell leukemia virus 1 infection	2	0.0711643	-0.0618408	1.10161	-0.469587	-0.0217447	-0.345362	-0.352089	-0.244234	0.225823	0.096257
hsa03030	DNA replication	3	-0.991263	-1.01647	-0.983214	0.0267111	-1.03734	1.15328	0.683628	1.43647	0.211569	0.516624
hsa03410	Base excision repair	3	-0.981769	-1.01661	-0.99309	0.0407901	-1.04709	1.06994	0.903507	1.40118	0.182533	0.440601
hsa03420	Nucleotide excision repair	3	-1.03576	-1.04413	-1.02986	0.0513836	-1.0854	1.06975	0.698015	1.27394	0.409997	0.692052
hsa03430	Mismatch repair	3	-1.00612	-1.02817	-0.976009	-0.0446116	-1.05135	1.11576	0.592894	1.4101	0.327737	0.659775
hsa03440	Homologous recombination	3	-0.80886	-0.963877	-0.940386	-0.289141	-1.00278	1.0695	0.512417	1.37437	0.160702	0.888048
hsa04010	MAPK signaling pathway	4	0.106036	-0.0382783	1.57389	-0.532659	0.209786	-0.337742	-0.299795	-0.339158	-0.186758	-0.155322
hsa04014	Ras signaling pathway	4	0.324585	-0.00920342	1.60615	-0.486049	0.0593969	-0.30402	-0.316584	-0.319789	-0.244526	-0.309965
hsa04015	Rap1 signaling pathway	4	0.01954	0.0263147	1.2494	-0.519967	0.0915841	-0.190114	-0.144396	-0.235453	-0.151617	-0.145293
hsa05135	Yersinia infection	4	0.379603	-0.0515928	1.20573	-0.56893	-0.010345	-0.382637	-0.34019	-0.419028	0.0610309	0.126361
hsa04935	Growth hormone synthesis, secretion and action	5	0.207195	-0.0157105	1.63492	-0.564723	0.312945	-0.367962	-0.34715	-0.39565	-0.295826	-0.168037
hsa05169	Epstein-Barr virus infection	5	0.102241	0.0859565	1.07502	-0.598502	0.0119008	-0.396314	-0.281997	-0.318826	0.0879918	0.232527
hsa05215	Prostate cancer	5	-0.134283	-0.0799793	1.76231	-0.628126	0.213834	-0.387045	-0.42429	-0.236487	-0.0654506	-0.0204841
hsa05220	Chronic myeloid leukemia	5	0.547532	0.038348	2.39511	-0.599762	0.486655	-0.589745	-0.526068	-0.581967	-0.599808	-0.570293
hsa05226	Gastric cancer	5	0.569985	-0.141275	1.33412	-0.42119	0.0897557	-0.188807	-0.250432	-0.0384933	-0.525833	-0.427831
hsa04520	Adherens junction	6	0.0710754	-0.126966	1.19971	-0.460107	-0.243955	-0.282888	-0.407399	-0.414116	0.324852	0.339794
hsa04660	T cell receptor signaling pathway	6	0.0676186	-0.145773	1.14948	-0.474676	-0.194686	-0.361743	-0.430343	-0.449721	0.438837	0.401002
hsa05130	Pathogenic Escherichia coli infection	6	0.0454252	0.197166	1.08978	-0.596556	0.212087	-0.473778	-0.524937	-0.533087	0.386735	0.197161
hsa05131	Shigellosis	6	0.129235	-0.202549	1.02072	-0.409238	-0.166388	-0.295881	-0.373232	-0.348896	0.373151	0.273076
hsa05132	Salmonella infection	6	0.142565	-0.0555592	0.752431	-0.572211	0.0179514	-0.273449	-0.258784	-0.394307	0.373764	0.267598
hsa05162	Measles	7	0.211856	0.293481	1.27913	-0.704601	0.251122	-0.520941	-0.40506	-0.316283	-0.195686	0.106985
hsa05222	Small cell lung cancer	7	-0.153048	-0.259539	0.911266	-0.445045	-0.315516	0.0807076	-0.147774	0.222618	-0.147895	0.254225
hsa04012	ErbB signaling pathway	8	1.48681	0.221408	1.70007	-0.601416	0.130665	-0.559328	-0.57651	-0.616892	-0.614323	-0.57049
hsa04370	VEGF signaling pathway	8	0.285136	-0.095166	1.59027	-0.441334	-0.0533202	-0.359139	-0.378304	-0.410477	-0.143604	0.00594277
hsa04620	Toll-like receptor signaling pathway	8	0.304139	-0.149449	0.746085	-0.555941	-0.0563608	-0.34751	-0.131963	-0.33517	0.00721904	0.51895
hsa04650	Natural killer cell mediated cytotoxicity	8	-0.152353	-0.134148	0.519139	-0.522866	-0.0840697	-0.354366	-0.344747	-0.404173	1.03559	0.441993
hsa04662	B cell receptor signaling pathway	8	0.150903	-0.0611207	1.41107	-0.600513	-0.118424	-0.457319	-0.519521	-0.540542	0.430708	0.304762
hsa04664	Fc epsilon RI signaling pathway	8	0.406777	-0.105014	1.23239	-0.610086	-0.100733	-0.432876	-0.291545	-0.451184	0.0975766	0.254697
hsa04666	Fc gamma R-mediated phagocytosis	8	0.490886	-0.0130524	1.52275	-0.514651	-0.151903	-0.478575	-0.476552	-0.498934	0.0102986	0.10973
hsa04722	Neurotrophin signaling pathway	8	0.612432	0.0201856	1.8439	-0.497288	0.0740713	-0.49085	-0.474169	-0.50848	-0.332512	-0.247288
hsa05205	Proteoglycans in cancer	8	0.445486	-0.0512989	1.28905	-0.422419	0.0680745	-0.39144	-0.504637	-0.453173	0.0127962	0.0075643
hsa05211	Renal cell carcinoma	8	0.0303201	-0.285309	1.19611	-0.326026	0.0607271	-0.186552	-0.181179	-0.294166	-0.0366497	0.0227221
hsa05212	Pancreatic cancer	9	0.0718994	-0.209481	1.45453	-0.450273	0.0355766	-0.163897	-0.352482	-0.11765	-0.192779	-0.075445
hsa04657	IL-17 signaling pathway	10	0.259125	-0.0234408	0.737992	-0.499122	0.23468	-0.51236	-0.477296	-0.536887	0.240446	0.576864
hsa04668	TNF signaling pathway	10	0.219637	0.141116	1.11161	-0.614715	0.356721	-0.4854	-0.421008	-0.525037	-0.0102231	0.227301
hsa05167	Kaposi sarcoma-associated herpesvirus infection	10	0.225275	0.0438162	0.929616	-0.549156	0.16167	-0.386326	-0.349282	-0.372856	0.222541	0.0747007
hsa04210	Apoptosis	11	0.164767	-0.178007	0.952793	-0.484339	0.0859639	-0.255112	-0.306949	-0.250314	0.235598	0.035598
hsa04371	Apelin signaling pathway	11	0.390194	0.103857	2.16388	-0.518497	0.0704976	-0.462741	-0.530576	-0.469814	-0.403977	-0.342822
hsa04725	Cholinergic synapse	11	0.276971	-0.114315	2.03519	-0.482884	0.115855	-0.403709	-0.5015	-0.407804	-0.279213	-0.238587
hsa04730	Long-term depression	11	0.0761531	-0.1057	1.87224	-0.464804	0.112733	-0.336059	-0.50331	-0.350558	-0.170643	-0.130054
hsa05163	Human cytomegalovirus infection	11	0.230973	0.00196666	1.68879	-0.604769	0.175608	-0.389492	-0.357547	-0.381309	-0.146587	-0.217636
hsa05170	Human immunodeficiency virus 1 infection	11	-0.00185439	-0.179458	1.00353	-0.445664	-0.0703575	-0.145089	-0.0595928	-0.131561	0.0356088	-0.00555889
hsa05418	Fluid shear stress and atherosclerosis	12	0.38568	-0.0738711	1.37531	-0.580424	-0.090491	-0.424532	-0.30654	-0.426742	-0.0822857	0.223893
hsa05100	Bacterial invasion of epithelial cells	13	-0.331827	-0.22592	0.775914	-0.293665	-0.349553	-0.0993629	-0.224179	-0.219622	0.333849	0.634365
hsa04150	mTOR signaling pathway	14	0.947941	0.0363747	1.55149	-0.339798	0.239411	-0.542613	-0.526221	-0.498944	-0.464025	-0.403615
hsa04330	Notch signaling pathway	14	0.503311	0.410783	1.95872	-0.48376	0.241515	-0.559821	-0.529097	-0.612508	-0.482751	-0.446387
hsa05224	Breast cancer	14	0.681717	-0.0102852	1.24276	-0.380107	-0.0312471	-0.176557	-0.334933	-0.169043	-0.445654	-0.376645
hsa05225	Hepatocellular carcinoma	14	1.01086	0.0232773	1.98846	-0.493646	0.3734	-0.585863	-0.555585	-0.603602	-0.575991	-0.581312
hsa04720	Long-term potentiation	15	-0.0532449	-0.310423	1.39871	-0.343856	-0.0424605	-0.191067	-0.477456	-0.202759	0.101816	0.120741
hsa04912	GnRH signaling pathway	15	0.0328284	-0.337686	0.646608	-0.478223	-0.274298	0.193064	-0.119973	-0.169111	0.0398552	0.466935
hsa04915	Estrogen signaling pathway	15	0.388606	0.0974558	1.41252	-0.475707	0.498555	-0.417452	-0.496232	-0.420277	-0.298525	-0.28894
hsa04062	Chemokine signaling pathway	16	0.173967	-0.119507	0.820931	-0.456486	-0.0477999	-0.462413	-0.317204	-0.384984	0.316629	0.476866
hsa04728	Dopaminergic synapse	17	0.403351	-0.00837745	2.0365	-0.516741	0.171583	-0.454802	-0.531711	-0.469436	-0.365058	-0.265306
hsa04261	Adrenergic signaling in cardiomyocytes	18	0.486849	0.0837967	2.47443	-0.60765	0.394169	-0.603377	-0.574117	-0.611867	-0.50991	-0.532321
hsa05142	Chagas disease	18	0.9304	0.347159	1.84076	-0.675882	0.753103	-0.681529	-0.625761	-0.676671	-0.619725	-0.591851
hsa05145	Toxoplasmosis	18	-0.0387746	-0.186879	0.847881	-0.539196	0.207434	-0.197322	-0.214287	-0.342077	0.184495	0.278724
hsa05160	Hepatitis C	19	0.293322	0.219291	1.18508	-0.59673	0.299714	-0.551511	-0.442397	-0.496623	-0.24935	0.339201
hsa05164	Influenza A	19	0.0296981	0.00937853	0.582376	-0.594031	0.0767906	-0.550413	-0.521143	-0.551884	0.81544	0.703788
hsa04810	Regulation of actin cytoskeleton	20	-0.0330705	-0.0955773	1.20905	-0.368373	-0.109906	-0.129615	-0.231707	-0.181973	-0.0236908	-0.0351422
hsa04611	Platelet activation	21	0.131354	-0.329282	1.39462	-0.383749	-0.102672	-0.297881	-0.451653	-0.272315	0.182565	0.129008
hsa04914	Progesterone-mediated oocyte maturation	21	0.297562	-0.259446	1.61288	-0.454751	-0.104664	-0.212786	-0.379881	-0.211885	-0.138907	-0.148124
hsa04071	Sphingolipid signaling pathway	22	0.760452	0.10802	2.08134	-0.611957	0.205241	-0.587851	-0.567885	-0.60073	-0.403574	-0.383055
hsa04152	AMPK signaling pathway	22	0.646658	-0.0908464	1.81726	-0.525663	0.0454147	-0.43893	-0.462509	-0.370569	-0.365685	-0.255127
hsa04622	RIG-I-like receptor signaling pathway	23	0.698737	0.265324	1.27147	-0.646173	0.460783	-0.633361	-0.56688	-0.66954	-0.354259	0.173904
hsa04934	Cushing syndrome	24	0.410113	-0.055339	1.54871	-0.461168	0.173475	-0.385626	-0.436961	-0.295586	-0.292444	-0.205173
hsa05140	Leishmaniasis	25	-0.338362	-0.171647	0.354682	-0.583031	0.107762	-0.366933	-0.295032	-0.210305	0.762421	0.740443
hsa05152	Tuberculosis	25	0.284929	-0.0926901	0.837695	-0.62015	0.308915	-0.358946	-0.253569	-0.210601	0.0642486	0.0401682
hsa03460	Fanconi anemia pathway	26	-0.464721	-0.645141	-0.105503	-0.430301	-0.641898	0.611898	0.315094	0.907673	-0.0440855	0.496985
hsa03040	Spliceosome	27	-0.643684	-0.733703	-0.439527	-0.0806023	-0.833356	0.902536	0.33228	0.431637	0.382358	0.682062
hsa04710	Circadian rhythm	28	0.731747	-0.400359	0.656596	-0.34975	-0.532188	0.292459	-0.0855299	-0.22022	-0.0352451	-0.0575087
hsa04141	Protein processing in endoplasmic reticulum	29	-0.0192383	0.11532	1.18436	-0.352583	0.148963	-0.23785	-0.252047	-0.384417	-0.0202758	-0.182236
hsa04217	Necroptosis	30	0.669294	0.34291	1.46485	-0.660456	0.364325	-0.643887	-0.615024	-0.646091	-0.00913626	-0.266783
hsa04670	Leukocyte transendothelial migration	31	-0.371058	0.158673	0.604208	-0.567095	0.0586476	-0.21527	-0.330731	-0.26398	0.281433	0.645173
hsa04310	Wnt signaling pathway	32	0.633634	0.0360502	1.30542	-0.402176	0.134544	-0.355931	-0.288449	-0.410116	-0.312867	-0.34011
hsa04380	Osteoclast differentiation	33	0.163588	0.0176648	1.19655	-0.592285	0.319071	-0.380879	-0.252572	-0.292934	-0.242157	0.0639485
hsa04120	Ubiquitin mediated proteolysis	34	-0.194582	0.0021876	0.681333	-0.40231	0.180529	-0.0339454	-0.216109	-0.078464	0.0617284	-0.000367799
hsa04137	Mitophagy	35	0.0507948	0.286607	1.9672	-0.52784	0.125418	-0.448368	-0.458185	-0.464114	-0.255309	-0.276203
hsa04625	C-type lectin receptor signaling pathway	36	0.236136	0.0497444	1.66846	-0.514307	0.224063	-0.463361	-0.552059	-0.440063	-0.0499333	-0.158679
hsa05323	Rheumatoid arthritis	37	-0.214961	-0.220344	0.0823457	-0.459012	0.0787606	-0.314361	-0.354497	-0.242342	0.841173	0.803238
hsa04621	NOD-like receptor signaling pathway	38	-0.0966284	-0.145473	0.637157	-0.471015	-0.0163182	-0.311631	-0.285736	-0.218508	0.447522	0.46063
hsa04072	Phospholipase D signaling pathway	39	0.304269	-0.141804	1.49074	-0.446292	-0.0662707	-0.230218	-0.0320943	-0.0878526	-0.499446	-0.291035
hsa05203	Viral carcinogenesis	40	-0.267406	0.0736879	1.1263	-0.583411	0.0608317	-0.344343	-0.328578	-0.108872	0.247841	0.123955
hsa04068	FoxO signaling pathway	41	0.550554	-0.149886	1.78968	-0.536948	0.286426	-0.518224	-0.496812	-0.462072	-0.258042	-0.204674
hsa04140	Autophagy	42	0.540829	0.187507	2.10127	-0.561528	0.111833	-0.533074	-0.582368	-0.522867	-0.37542	-0.366177
hsa03010	Ribosome	43	-1.07969	-1.08398	-1.05054	0.372351	-1.10931	1.18764	1.00955	0.597801	0.633881	0.522293
hsa00270	Cysteine and methionine metabolism	44	-0.0941599	-0.116659	1.23327	-0.601721	-0.00714378	-0.586452	-0.580978	-0.599747	0.630451	0.723144
hsa04390	Hippo signaling pathway	45	0.632564	0.138385	1.1833	-0.474123	0.281264	-0.300979	-0.370834	-0.329793	-0.378313	-0.381476
