# Supplementary material for: Analysis of the effects of aryl hydrocarbon receptor expression on cancer cell invasionviathree-dimensional microfluidic invasion assays
Source: Royal Society of Chemistry journal article supplement (doi:10.1039/d1lc00854d), 2021-12-14
Supplement: d1lc00854d7.xlsx [file d1lc00854d7.xlsx]

## Sheet: Fig4D_input_ii_Specific_paths_G
KEGG Pathway ID	Genes	WT 1	WT 2	WT 3	WT 4	WT 5	AHRko 1	AHRko 2	AHRko 3	AHRko 4	AHRko 5	Term Description
hsa03050	PSME2	53.7571	59.7999	56.2776	28.3495	396.097	724.656	667.071	669.22	590.952	596.149	Proteasome
hsa03050	PSMB6	113.028	64.1332	51.847	19.29	1308.56	1400.42	1092.21	1892.45	1799.69	1859.64	Proteasome
hsa03050	PSMA2	1.22523	1.51666	2.78089	0.801182	16.9147	26.8449	28.9502	20.0153	23.8278	19.7794	Proteasome
hsa03050	PSMB7	78.1086	95.3332	67.2126	29.1507	536.342	1003.88	867.325	815.703	792.112	821.277	Proteasome
hsa03050	PSMB9	1.83785	6.06666	5.6089	7.51878	19.5784	108.532	68.9641	27.9245	18.577	16.4348	Proteasome
hsa03050	PSMD7	17.1533	14.95	16.5439	8.62811	120.534	236.247	195.46	177.595	203.333	229.654	Proteasome
hsa03050	PSMB3	39.8201	68.4665	72.6329	26.8704	565.111	1230.85	949.602	866.145	864.248	778.719	Proteasome
hsa03050	PSMB4	10.4145	14.5166	7.77705	4.56057	108.414	192.212	161.826	136.072	170.851	138.744	Proteasome
hsa05012	ITPR1	0.306308	0.866665	0.282802	0.554664	4.26197	8.3462	8.81412	3.14756	6.30098	6.22791	Parkinson disease
hsa05012	PSMB3	39.8201	68.4665	72.6329	26.8704	565.111	1230.85	949.602	866.145	864.248	778.719	Parkinson disease
hsa05012	NDUFB3	11.3334	18.2	12.9146	5.48501	326.44	403.327	355.958	420.482	447.623	344.323	Parkinson disease
hsa05012	PSMB4	10.4145	14.5166	7.77705	4.56057	108.414	192.212	161.826	136.072	170.851	138.744	Parkinson disease
hsa05012	PINK1	104.757	389.783	171.614	155.799	7.99119	26.1909	21.8694	8.95845	7.74948	8.24621	Parkinson disease
hsa05012	MCU	121.451	195.65	61.8865	56.0211	23.1745	7.41193	19.8779	16.6256	14.9196	17.4151	Parkinson disease
hsa05012	DUSP1	427.606	895.048	168.738	241.834	39.956	43.911	31.4948	27.2789	22.488	22.8357	Parkinson disease
hsa05012	PSMA2	1.22523	1.51666	2.78089	0.801182	16.9147	26.8449	28.9502	20.0153	23.8278	19.7794	Parkinson disease
hsa05012	GNAI2	2026.54	5470.17	1547.07	1659.25	308.593	286.823	379.708	358.782	267.9	283.745	Parkinson disease
hsa05012	PSMB6	113.028	64.1332	51.847	19.29	1308.56	1400.42	1092.21	1892.45	1799.69	1859.64	Parkinson disease
hsa05012	PSMD7	17.1533	14.95	16.5439	8.62811	120.534	236.247	195.46	177.595	203.333	229.654	Parkinson disease
hsa05012	NDUFB2	26.1894	15.3833	25.5936	24.282	133.586	314.54	234.22	257.535	202.5	125.481	Parkinson disease
hsa05012	KLC3	0.306308	3.03333	11.9719	11.1549	0	2.24226	1.62268	0	0.072425	0.0576658	Parkinson disease
hsa05012	NDUFA6	8.42348	8.88332	5.3261	3.38962	194.452	283.833	215.706	305.394	286.405	218.38	Parkinson disease
hsa05012	PSMB7	78.1086	95.3332	67.2126	29.1507	536.342	1003.88	867.325	815.703	792.112	821.277	Parkinson disease
hsa05017	PSMA2	1.22523	1.51666	2.78089	0.801182	16.9147	26.8449	28.9502	20.0153	23.8278	19.7794	Spinocerebellar ataxia
hsa05017	WIPI2	370.633	699.182	198.668	192.962	38.0914	67.5482	41.7472	37.3672	32.6275	29.3231	Spinocerebellar ataxia
hsa05017	ITPR1	0.306308	0.866665	0.282802	0.554664	4.26197	8.3462	8.81412	3.14756	6.30098	6.22791	Spinocerebellar ataxia
hsa05017	AKT1	524.4	783.465	187.215	224.886	65.9273	39.8002	50.4138	88.0914	55.2603	68.853	Spinocerebellar ataxia
hsa05017	PSMB6	113.028	64.1332	51.847	19.29	1308.56	1400.42	1092.21	1892.45	1799.69	1859.64	Spinocerebellar ataxia
hsa05017	PSMB4	10.4145	14.5166	7.77705	4.56057	108.414	192.212	161.826	136.072	170.851	138.744	Spinocerebellar ataxia
hsa05017	PSMB3	39.8201	68.4665	72.6329	26.8704	565.111	1230.85	949.602	866.145	864.248	778.719	Spinocerebellar ataxia
hsa05017	PSMB7	78.1086	95.3332	67.2126	29.1507	536.342	1003.88	867.325	815.703	792.112	821.277	Spinocerebellar ataxia
hsa05017	PSMD7	17.1533	14.95	16.5439	8.62811	120.534	236.247	195.46	177.595	203.333	229.654	Spinocerebellar ataxia
hsa05017	ULK2	12.2523	23.1833	15.6484	8.62811	1.06549	4.3911	4.27799	0.807067	0.796675	0.922653	Spinocerebellar ataxia
hsa05017	MCU	121.451	195.65	61.8865	56.0211	23.1745	7.41193	19.8779	16.6256	14.9196	17.4151	Spinocerebellar ataxia
hsa05020	KLC3	0.306308	3.03333	11.9719	11.1549	0	2.24226	1.62268	0	0.072425	0.0576658	Prion disease
hsa05020	ITPR1	0.306308	0.866665	0.282802	0.554664	4.26197	8.3462	8.81412	3.14756	6.30098	6.22791	Prion disease
hsa05020	NDUFB2	26.1894	15.3833	25.5936	24.282	133.586	314.54	234.22	257.535	202.5	125.481	Prion disease
hsa05020	NDUFB3	11.3334	18.2	12.9146	5.48501	326.44	403.327	355.958	420.482	447.623	344.323	Prion disease
hsa05020	MCU	121.451	195.65	61.8865	56.0211	23.1745	7.41193	19.8779	16.6256	14.9196	17.4151	Prion disease
hsa05020	PSMD7	17.1533	14.95	16.5439	8.62811	120.534	236.247	195.46	177.595	203.333	229.654	Prion disease
hsa05020	NCF2	0.153154	1.73333	0.377069	0.369776	0.799119	3.92396	12.4652	1.2106	1.01395	1.81647	Prion disease
hsa05020	NDUFA6	8.42348	8.88332	5.3261	3.38962	194.452	283.833	215.706	305.394	286.405	218.38	Prion disease
hsa05020	RAC1	4218.48	12520.7	4869.9	4111.17	508.24	807.931	776.639	712.035	632.126	534.504	Prion disease
hsa05020	PSMB3	39.8201	68.4665	72.6329	26.8704	565.111	1230.85	949.602	866.145	864.248	778.719	Prion disease
hsa05020	PSMB4	10.4145	14.5166	7.77705	4.56057	108.414	192.212	161.826	136.072	170.851	138.744	Prion disease
hsa05020	PSMA2	1.22523	1.51666	2.78089	0.801182	16.9147	26.8449	28.9502	20.0153	23.8278	19.7794	Prion disease
hsa05020	FYN	96.1808	182.65	42.5617	46.7767	15.9824	10.4639	13.9035	15.5764	11.6604	13.3496	Prion disease
hsa05020	CREB3L1	23.5857	204.966	21.87	73.9552	3.59604	17.471	15.6737	5.20558	5.17839	4.35377	Prion disease
hsa05020	PSMB7	78.1086	95.3332	67.2126	29.1507	536.342	1003.88	867.325	815.703	792.112	821.277	Prion disease
hsa05020	PSMB6	113.028	64.1332	51.847	19.29	1308.56	1400.42	1092.21	1892.45	1799.69	1859.64	Prion disease
hsa05020	PRKCD	137.073	278.416	75.5081	70.2575	27.0369	17.0661	23.1232	20.5399	16.3681	19.0297	Prion disease
hsa04110	CCNE1	35.2254	226.633	103.694	76.6053	5.59384	15.6958	24.6353	9.68481	8.4013	11.3025	Cell cycle
hsa04110	SMC3	26.0362	14.5166	22.9541	2.34192	147.97	303.297	264.571	200.395	280.864	302.198	Cell cycle
hsa04110	RBX1	11.4866	26.65	13.8102	6.03968	357.872	476.232	402.315	483.11	468.047	367.043	Cell cycle
hsa04110	CDKN1C	2.45047	65.4332	21.8229	36.1764	1.33187	13.8896	6.93329	0.968481	0.8691	0.807321	Cell cycle
hsa04110	TGFB1	39.6669	107.9	24.321	102.181	6.39295	6.35308	10.3262	7.94961	6.3734	7.41006	Cell cycle
hsa04110	E2F1	88.2168	379.383	116.09	85.9113	11.8536	17.6578	22.6807	28.3281	21.7275	21.74	Cell cycle
hsa04110	E2F5	86.9915	97.7165	33.0407	26.5006	12.7859	7.22507	7.11768	6.61795	7.45978	8.15971	Cell cycle
hsa04110	CCNE2	1.53154	5.84999	3.53502	1.35585	5.86021	16.1318	22.6069	16.7063	14.3764	27.9391	Cell cycle
hsa04110	CDC27	14.5496	9.31665	4.6191	1.72562	52.2091	115.134	110.306	65.5339	108.746	105.528	Cell cycle
hsa04110	PCNA	11.3334	24.05	24.3681	17.6876	139.979	230.175	263.539	206.851	206.375	265.465	Cell cycle
hsa04110	CCND3	181.947	1384.93	1168.68	834.955	34.2289	218.652	257.896	68.52	67.2466	70.3811	Cell cycle
hsa04110	PTTG1	43.9552	55.4666	41.9489	16.8248	594.678	832.347	787.444	683.546	732.145	750.002	Cell cycle
hsa04114	CCNE1	35.2254	226.633	103.694	76.6053	5.59384	15.6958	24.6353	9.68481	8.4013	11.3025	Oocyte meiosis
hsa04114	CDC27	14.5496	9.31665	4.6191	1.72562	52.2091	115.134	110.306	65.5339	108.746	105.528	Oocyte meiosis
hsa04114	RPS6KA2	71.6761	221	46.0967	76.9751	11.3209	17.0038	14.5304	4.96346	2.6073	2.99862	Oocyte meiosis
hsa04114	RBX1	11.4866	26.65	13.8102	6.03968	357.872	476.232	402.315	483.11	468.047	367.043	Oocyte meiosis
hsa04114	PTTG1	43.9552	55.4666	41.9489	16.8248	594.678	832.347	787.444	683.546	732.145	750.002	Oocyte meiosis
hsa04114	CCNE2	1.53154	5.84999	3.53502	1.35585	5.86021	16.1318	22.6069	16.7063	14.3764	27.9391	Oocyte meiosis
hsa04114	SMC3	26.0362	14.5166	22.9541	2.34192	147.97	303.297	264.571	200.395	280.864	302.198	Oocyte meiosis
hsa04114	ITPR1	0.306308	0.866665	0.282802	0.554664	4.26197	8.3462	8.81412	3.14756	6.30098	6.22791	Oocyte meiosis
hsa04114	SGO1	4.44147	2.6	3.11082	1.17096	44.6175	56.15	46.6153	51.733	68.3692	93.7934	Oocyte meiosis
hsa03030	POLA1	0	0	0.0471336	0.123259	4.12878	3.89282	4.79429	4.35816	7.85812	7.43889	DNA replication
hsa03030	RFC4	3.98201	13.8666	5.37324	4.06754	67.9251	81.6246	88.3256	94.4269	103.93	131.939	DNA replication
hsa03030	POLD3	6.58563	4.33333	2.07388	2.5268	33.6962	34.9731	42.0423	58.6334	78.4001	73.9852	DNA replication
hsa03030	FEN1	39.8201	23.1833	18.2407	8.68974	167.149	113.982	114.289	436.987	382.549	455.127	DNA replication
hsa03030	RPA4	0	0	0	0	0	0.0622851	0.221275	0.24212	0.362125	0.461327	DNA replication
hsa03030	PCNA	11.3334	24.05	24.3681	17.6876	139.979	230.175	263.539	206.851	206.375	265.465	DNA replication
hsa03030	POLE2	1.991	2.16666	2.35668	1.72562	37.6918	37.4022	50.8933	51.4102	59.8955	74.5619	DNA replication
hsa03030	RFC1	3.52254	1.51666	1.27261	0.369776	32.7639	40.1116	41.4522	28.3684	50.8786	49.3619	DNA replication
hsa03410	POLD3	6.58563	4.33333	2.07388	2.5268	33.6962	34.9731	42.0423	58.6334	78.4001	73.9852	Base excision repair
hsa03410	FEN1	39.8201	23.1833	18.2407	8.68974	167.149	113.982	114.289	436.987	382.549	455.127	Base excision repair
hsa03410	POLE2	1.991	2.16666	2.35668	1.72562	37.6918	37.4022	50.8933	51.4102	59.8955	74.5619	Base excision repair
hsa03410	PCNA	11.3334	24.05	24.3681	17.6876	139.979	230.175	263.539	206.851	206.375	265.465	Base excision repair
hsa03420	RFC1	3.52254	1.51666	1.27261	0.369776	32.7639	40.1116	41.4522	28.3684	50.8786	49.3619	Nucleotide excision repair
hsa03420	POLD3	6.58563	4.33333	2.07388	2.5268	33.6962	34.9731	42.0423	58.6334	78.4001	73.9852	Nucleotide excision repair
hsa03420	RPA4	0	0	0	0	0	0.0622851	0.221275	0.24212	0.362125	0.461327	Nucleotide excision repair
hsa03420	PCNA	11.3334	24.05	24.3681	17.6876	139.979	230.175	263.539	206.851	206.375	265.465	Nucleotide excision repair
hsa03420	ERCC4	0.765771	0	0.848406	0.184888	5.06109	7.06936	8.99852	8.95845	9.48768	9.91852	Nucleotide excision repair
hsa03420	RFC4	3.98201	13.8666	5.37324	4.06754	67.9251	81.6246	88.3256	94.4269	103.93	131.939	Nucleotide excision repair
hsa03420	POLE2	1.991	2.16666	2.35668	1.72562	37.6918	37.4022	50.8933	51.4102	59.8955	74.5619	Nucleotide excision repair
hsa03420	RBX1	11.4866	26.65	13.8102	6.03968	357.872	476.232	402.315	483.11	468.047	367.043	Nucleotide excision repair
hsa03430	RFC1	3.52254	1.51666	1.27261	0.369776	32.7639	40.1116	41.4522	28.3684	50.8786	49.3619	Mismatch repair
hsa03430	PCNA	11.3334	24.05	24.3681	17.6876	139.979	230.175	263.539	206.851	206.375	265.465	Mismatch repair
hsa03430	RFC4	3.98201	13.8666	5.37324	4.06754	67.9251	81.6246	88.3256	94.4269	103.93	131.939	Mismatch repair
hsa03430	POLD3	6.58563	4.33333	2.07388	2.5268	33.6962	34.9731	42.0423	58.6334	78.4001	73.9852	Mismatch repair
hsa03430	RPA4	0	0	0	0	0	0.0622851	0.221275	0.24212	0.362125	0.461327	Mismatch repair
hsa03440	POLD3	6.58563	4.33333	2.07388	2.5268	33.6962	34.9731	42.0423	58.6334	78.4001	73.9852	Homologous recombination
hsa03440	BRCA1	5.6667	1.3	1.60254	0.369776	12.6527	20.5852	26.258	18.9257	27.5939	30.2169	Homologous recombination
hsa03440	BRCA2	7.81086	2.16666	2.16815	0.369776	14.251	23.0143	24.4509	19.0871	41.3547	49.6503	Homologous recombination
hsa03440	RPA4	0	0	0	0	0	0.0622851	0.221275	0.24212	0.362125	0.461327	Homologous recombination
hsa03440	TOP3B	0	0	0	0	0	0.0311425	0.405671	0.201767	0.14485	0.20183	Homologous recombination
hsa03440	BRCC3	3.98201	3.89999	2.26241	1.60236	26.1046	41.9179	40.5671	31.3546	37.4075	42.442	Homologous recombination
hsa03460	FANCB	0.612616	0	0	0	4.79472	9.31162	7.9659	12.1464	13.7608	17.3286	Fanconi anemia pathway
hsa03460	HES1	37.3696	100.966	36.6228	41.3533	9.05669	9.09362	9.51483	13.8009	5.75779	5.07459	Fanconi anemia pathway
hsa03460	RPA4	0	0	0	0	0	0.0622851	0.221275	0.24212	0.362125	0.461327	Fanconi anemia pathway
hsa03460	RMI2	270.164	569.399	154.928	195.858	24.9059	48.7692	26.0736	38.0129	26.0368	32.3505	Fanconi anemia pathway
hsa03460	BRCA2	7.81086	2.16666	2.16815	0.369776	14.251	23.0143	24.4509	19.0871	41.3547	49.6503	Fanconi anemia pathway
hsa03460	ERCC4	0.765771	0	0.848406	0.184888	5.06109	7.06936	8.99852	8.95845	9.48768	9.91852	Fanconi anemia pathway
hsa03460	BRCA1	5.6667	1.3	1.60254	0.369776	12.6527	20.5852	26.258	18.9257	27.5939	30.2169	Fanconi anemia pathway
hsa03460	TOP3B	0	0	0	0	0	0.0311425	0.405671	0.201767	0.14485	0.20183	Fanconi anemia pathway
hsa03040	RNU1-1	0	0	0	0	0	0.155713	0.331913	0.0807067	0.398338	0.0864987	Spliceosome
hsa03040	BCAS2	9.80186	11.05	6.36304	3.32799	178.204	180.658	170.861	189.701	228.682	294.413	Spliceosome
hsa03040	SRSF9	3472.31	3739.01	2055.64	1871.87	263.843	331.076	282.642	433.355	349.306	386.534	Spliceosome
hsa03040	PQBP1	2.60362	10.8333	5.56177	4.99198	48.8795	90.2511	76.1555	67.5919	74.7064	58.848	Spliceosome
hsa03040	MAGOHB	6.12616	4.33333	0.848406	1.35585	127.593	60.728	74.3116	203.098	217.384	180.148	Spliceosome
hsa03040	CDC5L	4.28832	10.1833	6.55158	3.63613	45.8162	99.2824	107.65	46.2046	67.5363	72.8608	Spliceosome
hsa03040	ALYREF	454.255	986.048	399.175	205.411	49.8118	33.9765	101.233	65.3724	81.2247	75.1962	Spliceosome
hsa03040	RBM25	6.58563	2.6	2.40382	0.369776	80.1783	89.1922	100.791	85.2667	132.864	121.733	Spliceosome
hsa03040	SNRPC	24.5047	53.9499	47.1336	18.6737	373.588	759.068	758.273	511.277	463.412	413.608	Spliceosome
hsa03040	DDX46	7.3514	8.01665	8.01272	2.83495	55.4056	70.0707	81.9087	93.297	133.407	96.2731	Spliceosome
hsa03040	SNRPD3	9.80186	18.2	18.4293	10.9084	206.04	253.158	238.793	290.02	298.101	266.762	Spliceosome
hsa03040	RNVU1-18	0	0	0	0	0	0.0622851	0.295033	0.0807067	0.2897	0.0576658	Spliceosome
hsa03010	FAU	18.0722	29.2499	19.3719	7.64204	435.653	344.25	396.267	683.949	814.238	589.373	Ribosome
hsa03010	MRPL27	3.98201	19.9333	7.54138	5.91642	131.722	281.747	214.047	230.579	218.361	177.467	Ribosome
hsa03010	RPL38	43.0363	41.5999	38.1783	20.2761	702.026	534.998	664.378	1267.58	1443.83	886.122	Ribosome
hsa03010	RPS13	17.1533	22.3166	18.1936	8.38159	666.066	543.687	791.87	756.747	949.456	745.677	Ribosome
hsa03010	MRPS18C	3.36939	3.03333	2.54522	1.97214	83.1084	92.9293	75.0491	126.79	121.746	93.6204	Ribosome
hsa03010	MRPL33	7.3514	13	6.88151	3.26636	155.562	269.539	219.136	171.219	182.837	127.413	Ribosome
hsa03010	MRPS14	6.43247	3.03333	2.92229	1.35585	156.761	163.093	129.999	196.158	203.261	172.824	Ribosome
hsa04657	FOSL1	15838	2402.18	1504.69	1318.93	2170.28	370.939	368.128	1575.84	959.052	1075.81	IL-17 signaling pathway
hsa04657	CEBPB	390.696	753.999	152.053	286.946	41.0215	33.5405	35.2565	30.8703	26.6886	17.1267	IL-17 signaling pathway
hsa04657	JUND	68.9193	710.449	143.381	218.476	14.6505	35.0976	21.9431	22.5172	14.7747	12.3981	IL-17 signaling pathway
hsa04657	CSF2	6.89193	54.5999	95.587	64.2794	44.0848	708.68	623.959	21.7505	12.0588	15.8004	IL-17 signaling pathway
hsa04657	TRAF4	18.838	62.1832	12.349	20.8924	1.46505	3.51911	3.68792	2.74403	2.96943	2.07597	IL-17 signaling pathway
hsa04657	CCL20	0	0	0.188535	0	0.799119	10.5885	15.0467	2.09837	0.688038	1.32631	IL-17 signaling pathway
hsa04657	TRADD	164.488	196.516	120.191	163.626	15.4496	42.1981	22.7176	26.1893	21.8361	16.9826	IL-17 signaling pathway
hsa04657	CXCL2	55.5949	75.3999	302.645	461.789	53.541	63.3751	71.6194	20.3381	15.2455	16.4348	IL-17 signaling pathway
hsa04657	FADD	137.992	132.166	103.647	117.034	11.5872	19.2149	15.3786	27.1578	19.0116	14.7624	IL-17 signaling pathway
hsa04657	MMP1	0.918925	0.433333	0.282802	0.369776	3.32966	8.15935	17.2226	2.50191	0.217275	0.634324	IL-17 signaling pathway
hsa04657	MMP3	0	0.866665	0	0	0	1.74398	1.5858	0.0807067	0.615613	0.403661	IL-17 signaling pathway
hsa04657	CXCL10	0	0	0	0	0.266373	2.36683	9.7361	0.24212	0	0.0576658	IL-17 signaling pathway
hsa04668	AKT1	524.4	783.465	187.215	224.886	65.9273	39.8002	50.4138	88.0914	55.2603	68.853	TNF signaling pathway
hsa04668	PGAM5	105.829	231.4	126.931	66.8062	20.3775	15.6336	20.3204	23.405	18.6857	13.4361	TNF signaling pathway
hsa04668	CXCL10	0	0	0	0	0.266373	2.36683	9.7361	0.24212	0	0.0576658	TNF signaling pathway
hsa04668	TRADD	164.488	196.516	120.191	163.626	15.4496	42.1981	22.7176	26.1893	21.8361	16.9826	TNF signaling pathway
hsa04668	BCL3	98.1718	783.032	180.098	290.151	12.9191	37.3399	25.041	14.3658	4.99733	5.47825	TNF signaling pathway
hsa04668	MAP2K6	0	0	0	0	0	0.24914	0.590067	0.645654	0.43455	0.345995	TNF signaling pathway
hsa04668	CCL20	0	0	0.188535	0	0.799119	10.5885	15.0467	2.09837	0.688038	1.32631	TNF signaling pathway
hsa04668	CREB3L1	23.5857	204.966	21.87	73.9552	3.59604	17.471	15.6737	5.20558	5.17839	4.35377	TNF signaling pathway
hsa04668	CEBPB	390.696	753.999	152.053	286.946	41.0215	33.5405	35.2565	30.8703	26.6886	17.1267	TNF signaling pathway
hsa04668	MAP2K4	294.975	192.833	120.191	107.358	30.8993	21.2392	37.9856	25.8262	24.0451	33.0425	TNF signaling pathway
hsa04668	CSF2	6.89193	54.5999	95.587	64.2794	44.0848	708.68	623.959	21.7505	12.0588	15.8004	TNF signaling pathway
hsa04668	MMP3	0	0.866665	0	0	0	1.74398	1.5858	0.0807067	0.615613	0.403661	TNF signaling pathway
hsa04668	JUNB	124.821	149.066	184.34	239.738	18.3797	41.8867	33.5601	26.7946	16.4767	14.3011	TNF signaling pathway
hsa04668	CSF1	174.136	6190.59	1810.69	1814.98	23.4408	452.999	398.516	18.4011	12.4209	10.1492	TNF signaling pathway
hsa04668	CXCL2	55.5949	75.3999	302.645	461.789	53.541	63.3751	71.6194	20.3381	15.2455	16.4348	TNF signaling pathway
hsa04668	FADD	137.992	132.166	103.647	117.034	11.5872	19.2149	15.3786	27.1578	19.0116	14.7624	TNF signaling pathway
